# Supplementary material for: Green Space and Health in Mainland China: A Systematic Review
Source: MDPI journal article supplement (doi:10.3390/ijerph18189937), 2021-09-21
Supplement: s1 [file s1]

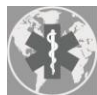

# Supplementary Materials

**Table S1.** Search strategy.

| EMBASE via Ovid (1947 to 2020) – 25 November 2020 |                                                                                                                                                                                                                                                                                                                                                                                                                                                                                                                                                                                           |
|---------------------------------------------------|-------------------------------------------------------------------------------------------------------------------------------------------------------------------------------------------------------------------------------------------------------------------------------------------------------------------------------------------------------------------------------------------------------------------------------------------------------------------------------------------------------------------------------------------------------------------------------------------|
| Health outcomes                                   | 1 exp health/                                                                                                                                                                                                                                                                                                                                                                                                                                                                                                                                                                             |
|                                                   | 2 exp disease/                                                                                                                                                                                                                                                                                                                                                                                                                                                                                                                                                                            |
|                                                   | 3 (disorder* or infection* or disabilit* or symptom* or pain* or death* or injur* or illness*).ti,ab.                                                                                                                                                                                                                                                                                                                                                                                                                                                                                     |
|                                                   | 4 exp Menopause/                                                                                                                                                                                                                                                                                                                                                                                                                                                                                                                                                                          |
|                                                   | 5 (menopaus* or perimenopaus* or peri-menopaus* or premenopaus* or pre-menopaus* or climacteric).ti,ab.                                                                                                                                                                                                                                                                                                                                                                                                                                                                                   |
|                                                   | 6 (pubertal timing or puberty timing or sexual precocity or sexual prematurity or precocious puberty or premature pubarche or premature thelarche or menarche or first spermatorrhea).ti,ab.                                                                                                                                                                                                                                                                                                                                                                                              |
|                                                   | 7 (otitis media or food-borne trematodiasis).ti,ab.                                                                                                                                                                                                                                                                                                                                                                                                                                                                                                                                       |
|                                                   | 8 (maternal adj3 complication*).ti,ab.                                                                                                                                                                                                                                                                                                                                                                                                                                                                                                                                                    |
|                                                   | 9 (pregnancy adj3 complica*).ti,ab.                                                                                                                                                                                                                                                                                                                                                                                                                                                                                                                                                       |
|                                                   | 10 (maternal adj3 problem*).ti,ab.                                                                                                                                                                                                                                                                                                                                                                                                                                                                                                                                                        |
|                                                   | 11 (obstructed labo?r or abortion or birth complication* or neonatal or birth asphyxia or birth trauma or birth sepsis or birth weight).ti,ab.                                                                                                                                                                                                                                                                                                                                                                                                                                            |
|                                                   | 12 ((pregnancy or birth) adj outcome*).ti,ab.                                                                                                                                                                                                                                                                                                                                                                                                                                                                                                                                             |
|                                                   | 13 (congenital anomal* or neural tube defect* or congenital heart or infertile* or Miscarriage).ti,ab.                                                                                                                                                                                                                                                                                                                                                                                                                                                                                    |
|                                                   | 14 (fertility or infertility).ti,ab.                                                                                                                                                                                                                                                                                                                                                                                                                                                                                                                                                      |
|                                                   | 15 (cancer* or melanoma or non-Hodgkin lymphoma or leuk*mia or neoplasm*).ti,ab.                                                                                                                                                                                                                                                                                                                                                                                                                                                                                                          |
|                                                   | 16 (cardiomyopathy or myocarditis or atrial fibrillation or atrial flutter* or aortic aneurysm or endocarditis or cardiovascular or hypertens* or blood pressure or dyslipidemia* or Hyperlipidemia* or vascular or insulin resistanc* or dyslipidaemia* or coronary or cardio* or cardiac or stroke or transient ischaemic attack* or diabet* or blood glucose).ti,ab.                                                                                                                                                                                                                   |
|                                                   | 17 (life expectancy or quality of life or psychological or Mental or Well-being or emotion or Depress* or anxi* or attention or stress* or Fear* or Restorati* or ruminat* or affect* or frustrate* or aggress* or lonely or loneliness or isolation or happy or happiness or resilient* or optimis* or hope* or empower*).ti,ab.                                                                                                                                                                                                                                                         |
|                                                   | 18 (mood* or panic or dysthymic or bipolar or cyclothymic or phobia or obsessive-compulsive or somatisation or somatoform or hypochondriasis or body dysmorphic or factitious or depersonalization or dissociative).ti,ab.                                                                                                                                                                                                                                                                                                                                                                |
|                                                   | 19 (arthritis or osteoarthritis).ti,ab.                                                                                                                                                                                                                                                                                                                                                                                                                                                                                                                                                   |
|                                                   | 20 (incident* or accident* or gout or drowning or poisoning* or exposure to mechanical forces or adverse effect* of medical treatment or animal contact or health outcome* or health stat* or mortalit* or morbidit* or chronic disease* or life expectanc* or stroke* or quality-adjusted life year* or daly* or qaly* or physiological effect* or motor development* or heart rate variability or physical function or cognitive function or thyroid or metabolic or inflammat* or degenerative or ischaemic heart or "digestive system disorder" or "bone density" or impoten*).ti,ab. |
|                                                   | 21 (autoimmun* or pneumoconiosis or respiratory or asthma or pulmonary or cirrhosis or hepati* or peptic ulcer* or gastritis or duodenitis or appendicitis or paralytic ileus or intestinal obstruction* or hernia* or pancreatitis or Alzheimer's or dementia or Parkinson's or epilepsy or multiple sclerosis or migraine* or headache* or schizophrenia or glomerulonephritis or urinary or h*emoglobinopath* or an*mia*).ti,ab.                                                                                                                                                       |
|                                                   | 22 (body mass index or adiposity or waist to hip or body fat or skinfold or waist circumference or body composition or overweight or over*weight or nutritional deficiency).ti,ab.                                                                                                                                                                                                                                                                                                                                                                                                        |
|                                                   | 23 exp body weight/                                                                                                                                                                                                                                                                                                                                                                                                                                                                                                                                                                       |
|                                                   | 24 exp obesity/                                                                                                                                                                                                                                                                                                                                                                                                                                                                                                                                                                           |
|                                                   | 25 exp neoplasm/                                                                                                                                                                                                                                                                                                                                                                                                                                                                                                                                                                          |
|                                                   | 26 sleep.ti,ab.                                                                                                                                                                                                                                                                                                                                                                                                                                                                                                                                                                           |
|                                                   | 27 insomnia.ti,ab.                                                                                                                                                                                                                                                                                                                                                                                                                                                                                                                                                                        |
|                                                   | 28 26. 1 or 2 or 3 or 4 or 5 or 6 or 7 or 8 or 9 or 10 or 11 or 12 or 13 or 14 or 15 or 16 or 17 or 18 or 19 or 20 or 21 or 22 or 23 or 24 or 25 or 26 or 27                                                                                                                                                                                                                                                                                                                                                                                                                              |
| Green space                                       | 29 (Green space* or greenspace* or green?ess or greener*).ti,ab.                                                                                                                                                                                                                                                                                                                                                                                                                                                                                                                          |
|                                                   | 30 (green infrastructure or wilderness or wild land or natural land).ti,ab.                                                                                                                                                                                                                                                                                                                                                                                                                                                                                                               |
|                                                   | 31 (municipal land or community land or public land or open land or wild space or municipal space or natural space or municipal park or botanic park or park access or wild area or natural area* or green area* or woodland or shinrin-yoku or forest bathing or tree canopy).ti,ab.                                                                                                                                                                                                                                                                                                     |
|                                                   | 33 (urban adj3 (park* or garden* or parkland* or horticultur* or forest* or botanical or arboretum or Allotment)).ti,ab.                                                                                                                                                                                                                                                                                                                                                                                                                                                                  |
|                                                   | 34 (city park or park availability or public garden).ti,ab.                                                                                                                                                                                                                                                                                                                                                                                                                                                                                                                               |
|                                                   | 35 (natural adj3 facilities).ti,ab.                                                                                                                                                                                                                                                                                                                                                                                                                                                                                                                                                       |
|                                                   | 36 (vegetation adj3 natural).ti,ab.                                                                                                                                                                                                                                                                                                                                                                                                                                                                                                                                                       |
|                                                   | 37 (belt adj3 green).ti,ab.                                                                                                                                                                                                                                                                                                                                                                                                                                                                                                                                                               |
|                                                   | 38 (trail adj3 recreation).ti,ab.                                                                                                                                                                                                                                                                                                                                                                                                                                                                                                                                                         |
|                                                   | 39 (Trail adj3 (green or cycl* or walk)).ti,ab.                                                                                                                                                                                                                                                                                                                                                                                                                                                                                                                                           |

|                       |    |                                                                                                                                               |
|-----------------------|----|-----------------------------------------------------------------------------------------------------------------------------------------------|
| Geographical settings | 40 | (open adj1 space).ti,ab.                                                                                                                      |
|                       | 41 | 29 or 30 or 31 or 32 or 33 or 34 or 35 or 36 or 37 or 38 or 39 or 40                                                                          |
|                       | 42 | exp Australia/                                                                                                                                |
|                       | 43 | ("South East* Asia*" or "West* Pacific" or Australian*).ti,ab.                                                                                |
|                       | 44 | exp Brunei/                                                                                                                                   |
|                       | 45 | Bruneian*.ti,ab.                                                                                                                              |
|                       | 46 | exp Cambodia/                                                                                                                                 |
|                       | 47 | Cambodian*.ti,ab.                                                                                                                             |
|                       | 48 | exp China/                                                                                                                                    |
|                       | 49 | Chinese.ti,ab.                                                                                                                                |
|                       | 50 | Cook Islands.ti,ab.                                                                                                                           |
|                       | 51 | Cook Islander*.ti,ab.                                                                                                                         |
|                       | 52 | exp Fiji/                                                                                                                                     |
|                       | 53 | exp Japan/                                                                                                                                    |
|                       | 54 | Japanese.ti,ab.                                                                                                                               |
|                       | 55 | ("Federated States" adj2 Micronesia).ti,ab.                                                                                                   |
|                       | 56 | Chuukese*.ti,ab.                                                                                                                              |
|                       | 57 | (Kosraean* or Pohnpeian* or Yapese* or tuvalu).ti,ab.                                                                                         |
|                       | 58 | (Kiribati or Kiribatian* or Marshall Island or Marshall Islander*).ti,ab.                                                                     |
|                       | 59 | exp Laos/                                                                                                                                     |
|                       | 60 | Lao.ti,ab.                                                                                                                                    |
|                       | 61 | exp Malaysia/                                                                                                                                 |
|                       | 62 | Malaysian*.ti,ab.                                                                                                                             |
|                       | 63 | Malay*.ti,ab.                                                                                                                                 |
|                       | 64 | exp Mongolia/                                                                                                                                 |
|                       | 65 | Mongolian*.ti,ab.                                                                                                                             |
|                       | 66 | Nauru.ti,ab.                                                                                                                                  |
|                       | 67 | Nauruan*.ti,ab.                                                                                                                               |
|                       | 68 | exp New Zealand/                                                                                                                              |
|                       | 69 | (New Zealander* or Niue or Niuean*).ti,ab.                                                                                                    |
|                       | 70 | exp Palau/                                                                                                                                    |
|                       | 71 | Palauan*.ti,ab.                                                                                                                               |
|                       | 72 | exp Papua New Guinea/                                                                                                                         |
|                       | 73 | Papuan*.ti,ab.                                                                                                                                |
|                       | 74 | exp Philippines/                                                                                                                              |
|                       | 75 | (Philippines or Philippine* or Filipino*).ti,ab.                                                                                              |
|                       | 76 | exp Republic of Korea/                                                                                                                        |
|                       | 77 | Korean*.ti,ab.                                                                                                                                |
|                       | 78 | exp Samoa/                                                                                                                                    |
|                       | 79 | Samoan*.ti,ab.                                                                                                                                |
|                       | 8  | exp Singapore/                                                                                                                                |
|                       | 81 | Singaporean*.ti,ab.                                                                                                                           |
|                       | 82 | (Solomon Islands or Solomon Islander*).ti,ab.                                                                                                 |
|                       | 83 | exp Tonga/                                                                                                                                    |
|                       | 84 | exp Vanuatu/                                                                                                                                  |
|                       | 85 | exp VietNam/                                                                                                                                  |
|                       | 86 | Vietnamese.ti,ab.                                                                                                                             |
|                       | 87 | (Indonesian* or Sri Lankan* or Thai or Timorese or Bangladeshi* or Bhutanese or Indian or Maldivian* or Burmese or Nepali* or Fijian*).ti,ab. |
|                       | 88 | exp Indonesia/                                                                                                                                |
|                       | 89 | exp Sri Lanka/                                                                                                                                |
|                       | 90 | exp Thailand/                                                                                                                                 |
|                       | 91 | exp Timor-Leste/                                                                                                                              |
|                       | 92 | exp Bangladesh/                                                                                                                               |
|                       | 93 | exp Bhutan/                                                                                                                                   |
|                       | 94 | "Democratic People's Republic of Korea"/                                                                                                      |
|                       | 95 | Korea.ti,ab.                                                                                                                                  |
|                       | 96 | exp India/                                                                                                                                    |
|                       | 97 | exp Maldives/                                                                                                                                 |
|                       | 98 | exp Myanmar/                                                                                                                                  |
|                       | 99 | exp Nepal/                                                                                                                                    |

|                                                           |                                                                                                                                                                                                                                                                                                                                                                                                                                                                                                                                                                                           |
|-----------------------------------------------------------|-------------------------------------------------------------------------------------------------------------------------------------------------------------------------------------------------------------------------------------------------------------------------------------------------------------------------------------------------------------------------------------------------------------------------------------------------------------------------------------------------------------------------------------------------------------------------------------------|
|                                                           | 42 or 43 or 44 or 45 or 46 or 47 or 48 or 49 or 50 or 51 or 52 or 53 or 54 or 55 or 56 or 57 or 58 or 59 or 60 or 61 or 62 or 63 or 64 or 65 or 66 or 67 or 68 or 69 or 70 or 71 or 72 or 73 or 74 or 75 or 76 or 77 or 78 or 79 or 80 or 81 or 82 or 83 or 84 or 85 or 86 or 87 or 88 or 89 or 90 or 91 or 92 or 93 or 94 or 95 or 96 or 97 or 98 or 99                                                                                                                                                                                                                                  |
| 100                                                       | or 66 or 67 or 68 or 69 or 70 or 71 or 72 or 73 or 74 or 75 or 76 or 77 or 78 or 79 or 80 or 81 or 82 or 83 or 84 or 85 or 86 or 87 or 88 or 89 or 90 or 91 or 92 or 93 or 94 or 95 or 96 or 97 or 98 or 99                                                                                                                                                                                                                                                                                                                                                                               |
| 101                                                       | 28 and 41 and 100                                                                                                                                                                                                                                                                                                                                                                                                                                                                                                                                                                         |
| 102                                                       | limit 101 to (human and english language)                                                                                                                                                                                                                                                                                                                                                                                                                                                                                                                                                 |
| <b>MEDLINE via Ovid (1985 to 2020) – 25 November 2020</b> |                                                                                                                                                                                                                                                                                                                                                                                                                                                                                                                                                                                           |
| <b>Health outcomes</b>                                    | 1 exp health/                                                                                                                                                                                                                                                                                                                                                                                                                                                                                                                                                                             |
|                                                           | 2 Disease*.ti,ab.                                                                                                                                                                                                                                                                                                                                                                                                                                                                                                                                                                         |
|                                                           | 3 (disorder* or infection* or disabilit* or symptom* or pain* or death* or injur* or illness*).ti,ab.                                                                                                                                                                                                                                                                                                                                                                                                                                                                                     |
|                                                           | 4 exp Menopause/                                                                                                                                                                                                                                                                                                                                                                                                                                                                                                                                                                          |
|                                                           | 5 (menopaus* or perimenopaus* or peri-menopaus* or premenopaus* or pre-menopaus* or climacteric).ti,ab.                                                                                                                                                                                                                                                                                                                                                                                                                                                                                   |
|                                                           | 6 (pubertal timing or puberty timing or sexual precocity or sexual prematurity or precocious puberty or premature pubarche or premature thelarche or menarche or first spermatorrhea).ti,ab.                                                                                                                                                                                                                                                                                                                                                                                              |
|                                                           | 7 (otitis media or food-borne trematodiasis).ti,ab.                                                                                                                                                                                                                                                                                                                                                                                                                                                                                                                                       |
|                                                           | 8 (maternal adj3 complication*).ti,ab.                                                                                                                                                                                                                                                                                                                                                                                                                                                                                                                                                    |
|                                                           | 9 (pregnancy adj3 complica*).ti,ab.                                                                                                                                                                                                                                                                                                                                                                                                                                                                                                                                                       |
|                                                           | 10 (maternal adj3 problem*).ti,ab.                                                                                                                                                                                                                                                                                                                                                                                                                                                                                                                                                        |
|                                                           | 11 (obstructed labo?r or abortion or birth complication* or neonatal or birth asphyxia or birth trauma or birth sepsis or birth weight).ti,ab.                                                                                                                                                                                                                                                                                                                                                                                                                                            |
|                                                           | 12 ((pregnancy or birth) adj outcome*).ti,ab.                                                                                                                                                                                                                                                                                                                                                                                                                                                                                                                                             |
|                                                           | 13 (congenital anomal* or neural tube defect* or congenital heart or infertile* or Miscarriage).ti,ab.                                                                                                                                                                                                                                                                                                                                                                                                                                                                                    |
|                                                           | 14 (fertility or infertility).ti,ab.                                                                                                                                                                                                                                                                                                                                                                                                                                                                                                                                                      |
|                                                           | 15 (cancer* or melanoma or non-Hodgkin lymphoma or leuk*mia or neoplasm*).ti,ab.                                                                                                                                                                                                                                                                                                                                                                                                                                                                                                          |
|                                                           | 16 (cardiomyopathy or myocarditis or atrial fibrillation or atrial flutter* or aortic aneurysm or endocarditis or cardiovascular or hypertens* or blood pressure or dyslipidemia* or Hyperlipidemia* or vascular or insulin resistanc* or dyslipidaemia* or coronary or cardio* or cardiac or stroke or transient ischaemic attack* or diabet* or blood glucose).ti,ab.                                                                                                                                                                                                                   |
|                                                           | 17 (life expectancy or quality of life or psychological or Mental or Well-being or emotion or Depress* or anxi* or attention or stress* or Fear* or Restorati* or ruminat* or affect* or rustrate* or agres* or lonely or loneliness or isolation or happy or happiness or resilien* or optimis* or hope* or empower*).ti,ab.                                                                                                                                                                                                                                                             |
|                                                           | 18 (mood* or panic or dysthymic or bipolar or cyclothymic or phobia or obsessive-compulsive or somatisation or somatoform or hypochondriasis or body dysmorphic or factitious or depersonali?ation or dissociative).ti,ab.                                                                                                                                                                                                                                                                                                                                                                |
|                                                           | 19 (arthritis or osteoarthritis).ti,ab.                                                                                                                                                                                                                                                                                                                                                                                                                                                                                                                                                   |
|                                                           | 20 (incident* or accident* or gout or drowning or poisoning* or exposure to mechanical forces or adverse effect* of medical treatment or animal contact or health outcome* or health stat* or mortalit* or morbidit* or chronic disease* or life expectanc* or stroke* or quality?adjusted life year* or daly* or qaly* or physiological effect* or motor development* or heart rate variability or physical function or cognitive function or thyroid or metabolic or inflammat* or degenerative or ischaemic heart or "digestive system disorder" or "bone density" or impoten*).ti,ab. |
|                                                           | 21 (autoimmun* or pneumoconiosis or respiratory or asthma or pulmonary or cirrhosis or hepati* or peptic ulcer* or gastritis or duodenitis or appendicitis or paralytic ileus or intestinal obstruction* or hernia* or pancreatitis or Alzheimer's or dementia or Parkinson's or epilepsy or multiple sclerosis or migraine* or headache* or schizophrenia or glomerulonephritis or urinary or h*moglobinopath* or an*mia*).ti,ab.                                                                                                                                                        |
|                                                           | 22 (body mass index or adiposity or waist to hip or body fat or skinfold or waist circumference or body composition or overweight or over*weight or nutritional deficiency).ti,ab.                                                                                                                                                                                                                                                                                                                                                                                                        |
|                                                           | 23 exp body weight/                                                                                                                                                                                                                                                                                                                                                                                                                                                                                                                                                                       |
|                                                           | 24 exp obesity/                                                                                                                                                                                                                                                                                                                                                                                                                                                                                                                                                                           |
|                                                           | 25 exp neoplasm/                                                                                                                                                                                                                                                                                                                                                                                                                                                                                                                                                                          |
|                                                           | 26 sleep.ti,ab.                                                                                                                                                                                                                                                                                                                                                                                                                                                                                                                                                                           |
|                                                           | 27 insomnia.ti,ab.                                                                                                                                                                                                                                                                                                                                                                                                                                                                                                                                                                        |
|                                                           | 28 26. 1 or 2 or 3 or 4 or 5 or 6 or 7 or 8 or 9 or 10 or 11 or 12 or 13 or 14 or 15 or 16 or 17 or 18 or 19 or 20 or 21 or 22 or 23 or 24 or 25 or 26 or 27                                                                                                                                                                                                                                                                                                                                                                                                                              |
| <b>Green space</b>                                        | 29 (Green space* or greenspace* or green?ess or greener*).ti,ab.                                                                                                                                                                                                                                                                                                                                                                                                                                                                                                                          |
|                                                           | 30 (green infrastructure or wilderness or wild land or natural land).ti,ab.                                                                                                                                                                                                                                                                                                                                                                                                                                                                                                               |
|                                                           | 31 (municipal land or community land or public land or open land or wild space or municipal space or natural space or municipal park or botanic park or park access or wild area or natural area* or green area* or woodland or shinrin-yoku or forest bathing or tree canopy).ti,ab.                                                                                                                                                                                                                                                                                                     |
|                                                           | 33 (urban adj3 (park* or garden* or parkland* or horticultur* or forest* or botanical or arboretum or Allotment)).ti,ab.                                                                                                                                                                                                                                                                                                                                                                                                                                                                  |
|                                                           | 34 (city park or park availability or public garden).ti,ab.                                                                                                                                                                                                                                                                                                                                                                                                                                                                                                                               |
|                                                           | 35 (natural adj3 facilities).ti,ab.                                                                                                                                                                                                                                                                                                                                                                                                                                                                                                                                                       |
|                                                           | 36 (vegetation adj3 natural).ti,ab.                                                                                                                                                                                                                                                                                                                                                                                                                                                                                                                                                       |
|                                                           | 37 (belt adj3 green).ti,ab.                                                                                                                                                                                                                                                                                                                                                                                                                                                                                                                                                               |
|                                                           | 38 (trial adj3 recreation).ti,ab.                                                                                                                                                                                                                                                                                                                                                                                                                                                                                                                                                         |
|                                                           | 39 (Trail adj3 (green or cycl* or walk)).ti,ab.                                                                                                                                                                                                                                                                                                                                                                                                                                                                                                                                           |

|                       |    |                                                                                                                                               |
|-----------------------|----|-----------------------------------------------------------------------------------------------------------------------------------------------|
| Geographical settings | 40 | (open adj1 space).ti,ab.                                                                                                                      |
|                       | 41 | 29 or 30 or 31 or 32 or 33 or 34 or 35 or 36 or 37 or 38 or 39 or 40                                                                          |
|                       | 42 | exp Australia/                                                                                                                                |
|                       | 43 | ("South East* Asia*" or "West* Pacific" or Australian*).ti,ab.                                                                                |
|                       | 44 | exp Brunei/                                                                                                                                   |
|                       | 45 | Bruneian*.ti,ab.                                                                                                                              |
|                       | 46 | exp Cambodia/                                                                                                                                 |
|                       | 47 | Cambodian*.ti,ab.                                                                                                                             |
|                       | 48 | exp China/                                                                                                                                    |
|                       | 49 | Chinese.ti,ab.                                                                                                                                |
|                       | 50 | Cook Islands.ti,ab.                                                                                                                           |
|                       | 51 | Cook Islander*.ti,ab.                                                                                                                         |
|                       | 52 | exp Fiji/                                                                                                                                     |
|                       | 53 | exp Japan/                                                                                                                                    |
|                       | 54 | Japanese.ti,ab.                                                                                                                               |
|                       | 55 | ("Federated States" adj2 Micronesia).ti,ab.                                                                                                   |
|                       | 56 | Chuukese*.ti,ab.                                                                                                                              |
|                       | 57 | (Kosraean* or Pohnpeian* or Yapese* or tuvalu).ti,ab.                                                                                         |
|                       | 58 | (Kiribati or Kiribatian* or Marshall Island or Marshall Islander*).ti,ab.                                                                     |
|                       | 59 | exp Laos/                                                                                                                                     |
|                       | 60 | Lao.ti,ab.                                                                                                                                    |
|                       | 61 | exp Malaysia/                                                                                                                                 |
|                       | 62 | Malaysian*.ti,ab.                                                                                                                             |
|                       | 63 | Malay*.ti,ab.                                                                                                                                 |
|                       | 64 | exp Mongolia/                                                                                                                                 |
|                       | 65 | Mongolian*.ti,ab.                                                                                                                             |
|                       | 66 | Nauru.ti,ab.                                                                                                                                  |
|                       | 67 | Nauruan*.ti,ab.                                                                                                                               |
|                       | 68 | exp New Zealand/                                                                                                                              |
|                       | 69 | (New Zealander* or Niue or Niuean*).ti,ab.                                                                                                    |
|                       | 70 | exp Palau/                                                                                                                                    |
|                       | 71 | Palauan*.ti,ab.                                                                                                                               |
|                       | 72 | exp Papua New Guinea/                                                                                                                         |
|                       | 73 | Papuan*.ti,ab.                                                                                                                                |
|                       | 74 | exp Philippines/                                                                                                                              |
|                       | 75 | (Philippines or Philippine* or Filipino*).ti,ab.                                                                                              |
|                       | 76 | exp Republic of Korea/                                                                                                                        |
|                       | 77 | Korean*.ti,ab.                                                                                                                                |
|                       | 78 | exp Samoa/                                                                                                                                    |
|                       | 79 | Samoa*.ti,ab.                                                                                                                                 |
|                       | 8  | exp Singapore/                                                                                                                                |
|                       | 81 | Singaporean*.ti,ab.                                                                                                                           |
|                       | 82 | (Solomon Islands or Solomon Islander*).ti,ab.                                                                                                 |
|                       | 83 | exp Tonga/                                                                                                                                    |
|                       | 84 | exp Vanuatu/                                                                                                                                  |
|                       | 85 | exp VietNam/                                                                                                                                  |
|                       | 86 | Vietnamese.ti,ab.                                                                                                                             |
|                       | 87 | (Indonesian* or Sri Lankan* or Thai or Timorese or Bangladeshi* or Bhutanese or Indian or Maldivian* or Burmese or Nepali* or Fijian*).ti,ab. |
|                       | 88 | exp Indonesia/                                                                                                                                |
|                       | 89 | exp Sri Lanka/                                                                                                                                |
|                       | 90 | exp Thailand/                                                                                                                                 |
|                       | 91 | exp Timor-Leste/                                                                                                                              |
|                       | 92 | exp Bangladesh/                                                                                                                               |
|                       | 93 | exp Bhutan/                                                                                                                                   |
|                       | 94 | "Democratic People's Republic of Korea"/                                                                                                      |
|                       | 95 | Korea.ti,ab.                                                                                                                                  |
|                       | 96 | exp India/                                                                                                                                    |
|                       | 97 | exp Maldives/                                                                                                                                 |
|                       | 98 | exp Myanmar/                                                                                                                                  |
|                       | 99 | exp Nepal/                                                                                                                                    |

|                                                                                                                                                                                                                                                                                                                                                          |                                                                                                                                                                                                                                                                                                                                                                                                                                                                                                                                                                                           |
|----------------------------------------------------------------------------------------------------------------------------------------------------------------------------------------------------------------------------------------------------------------------------------------------------------------------------------------------------------|-------------------------------------------------------------------------------------------------------------------------------------------------------------------------------------------------------------------------------------------------------------------------------------------------------------------------------------------------------------------------------------------------------------------------------------------------------------------------------------------------------------------------------------------------------------------------------------------|
| 42 or 43 or 44 or 45 or 46 or 47 or 48 or 49 or 50 or 51 or 52 or 53 or 54 or 55 or 56 or 57 or 58 or 59 or 60 or 61 or 62 or 63 or 64 or 65 or 66 or 67 or 68 or 69 or 70 or 71 or 72 or 73 or 74 or 75 or 76 or 77 or 78 or 79 or 80 or 81 or 82 or 83 or 84 or 85 or 86 or 87 or 88 or 89 or 90 or 91 or 92 or 93 or 94 or 95 or 96 or 97 or 98 or 99 |                                                                                                                                                                                                                                                                                                                                                                                                                                                                                                                                                                                           |
| 100                                                                                                                                                                                                                                                                                                                                                      | 28 and 41 and 100                                                                                                                                                                                                                                                                                                                                                                                                                                                                                                                                                                         |
| 101                                                                                                                                                                                                                                                                                                                                                      | limit 101 to (human and english language)                                                                                                                                                                                                                                                                                                                                                                                                                                                                                                                                                 |
| PsycINFO via Ovid (1806 to 2020) – 25 November 2020                                                                                                                                                                                                                                                                                                      |                                                                                                                                                                                                                                                                                                                                                                                                                                                                                                                                                                                           |
| Health outcomes                                                                                                                                                                                                                                                                                                                                          | 1 exp health/                                                                                                                                                                                                                                                                                                                                                                                                                                                                                                                                                                             |
|                                                                                                                                                                                                                                                                                                                                                          | 2 exp disease/                                                                                                                                                                                                                                                                                                                                                                                                                                                                                                                                                                            |
|                                                                                                                                                                                                                                                                                                                                                          | 3 (disorder* or infection* or disabilit* or symptom* or pain* or death* or injur* or illness*).ti,ab.                                                                                                                                                                                                                                                                                                                                                                                                                                                                                     |
|                                                                                                                                                                                                                                                                                                                                                          | 4 exp Menopause/                                                                                                                                                                                                                                                                                                                                                                                                                                                                                                                                                                          |
|                                                                                                                                                                                                                                                                                                                                                          | 5 (menopaus* or perimenopaus* or peri-menopaus* or premenopaus* or pre-menopaus* or climacteric).ti,ab.                                                                                                                                                                                                                                                                                                                                                                                                                                                                                   |
|                                                                                                                                                                                                                                                                                                                                                          | 6 (pubertal timing or puberty timing or sexual precocity or sexual prematurity or precocious puberty or premature pubarche or premature thelarche or menarche or first spermatorrhea).ti,ab.                                                                                                                                                                                                                                                                                                                                                                                              |
|                                                                                                                                                                                                                                                                                                                                                          | 7 (otitis media or food-borne trematodiasis).ti,ab.                                                                                                                                                                                                                                                                                                                                                                                                                                                                                                                                       |
|                                                                                                                                                                                                                                                                                                                                                          | 8 (maternal adj3 complication*).ti,ab.                                                                                                                                                                                                                                                                                                                                                                                                                                                                                                                                                    |
|                                                                                                                                                                                                                                                                                                                                                          | 9 (pregnancy adj3 complica*).ti,ab.                                                                                                                                                                                                                                                                                                                                                                                                                                                                                                                                                       |
|                                                                                                                                                                                                                                                                                                                                                          | 10 (maternal adj3 problem*).ti,ab.                                                                                                                                                                                                                                                                                                                                                                                                                                                                                                                                                        |
|                                                                                                                                                                                                                                                                                                                                                          | 11 (obstructed labo?r or abortion or birth complication* or neonatal or birth asphyxia or birth trauma or birth sepsis or birth weight).ti,ab.                                                                                                                                                                                                                                                                                                                                                                                                                                            |
|                                                                                                                                                                                                                                                                                                                                                          | 12 ((pregnancy or birth) adj outcome*).ti,ab.                                                                                                                                                                                                                                                                                                                                                                                                                                                                                                                                             |
|                                                                                                                                                                                                                                                                                                                                                          | 13 (congenital anomal* or neural tube defect* or congenital heart or infertile* or Miscarriage).ti,ab.                                                                                                                                                                                                                                                                                                                                                                                                                                                                                    |
|                                                                                                                                                                                                                                                                                                                                                          | 14 (fertility or infertility).ti,ab.                                                                                                                                                                                                                                                                                                                                                                                                                                                                                                                                                      |
|                                                                                                                                                                                                                                                                                                                                                          | 15 (cancer* or melanoma or non-Hodgkin lymphoma or leuk*mia or neoplasm*).ti,ab.                                                                                                                                                                                                                                                                                                                                                                                                                                                                                                          |
|                                                                                                                                                                                                                                                                                                                                                          | 16 (cardiomyopathy or myocarditis or atrial fibrillation or atrial flutter* or aortic aneurysm or endocarditis or cardiovascular or hypertens* or blood pressure or dyslipidemia* or Hyperlipidemia* or vascular or insulin resistanc* or dyslipidaemia* or coronary or cardio* or cardiac or stroke or transient ischaemic attack* or diabet* or blood glucose).ti,ab.                                                                                                                                                                                                                   |
|                                                                                                                                                                                                                                                                                                                                                          | 17 (life expectancy or quality of life or psychological or Mental or Well-being or emotion or Depress* or anxi* or attention or stress* or Fear* or Restorati* or ruminat* or affect* or frustrate* or agress* or lonely or loneliness or isolation or happy or happiness or resilien* or optimis* or hope* or empower*).ti,ab.                                                                                                                                                                                                                                                           |
|                                                                                                                                                                                                                                                                                                                                                          | 18 (mood* or panic or dysthymic or bipolar or cyclothymic or phobia or obsessive-compulsive or somatisation or somatoform or hypochondriasis or body dysmorphic or factitious or depersonalization or dissociative).ti,ab.                                                                                                                                                                                                                                                                                                                                                                |
|                                                                                                                                                                                                                                                                                                                                                          | 19 (arthritis or osteoarthritis).ti,ab.                                                                                                                                                                                                                                                                                                                                                                                                                                                                                                                                                   |
|                                                                                                                                                                                                                                                                                                                                                          | 20 (incident* or accident* or gout or drowning or poisoning* or exposure to mechanical forces or adverse effect* of medical treatment or animal contact or health outcome* or health stat* or mortalit* or morbidit* or chronic disease* or life expectanc* or stroke* or quality?adjusted life year* or daly* or qaly* or physiological effect* or motor development* or heart rate variability or physical function or cognitive function or thyroid or metabolic or inflammat* or degenerative or ischaemic heart or "digestive system disorder" or "bone density" or impoten*).ti,ab. |
|                                                                                                                                                                                                                                                                                                                                                          | 21 (autoimmun* or pneumoconiosis or respiratory or asthma or pulmonary or cirrhosis or hepati* or peptic ulcer* or gastritis or duodenitis or appendicitis or paralytic ileus or intestinal obstruction* or hernia* or pancreatitis or Alzheimer's or dementia or Parkinson's or epilepsy or multiple sclerosis or migraine* or headache* or schizophrenia or glomerulonephritis or urinary or h*moglobinopath* or an*mia*).ti,ab.                                                                                                                                                        |
|                                                                                                                                                                                                                                                                                                                                                          | 22 (body mass index or adiposity or waist to hip or body fat or skinfold or waist circumference or body composition or overweight or over*weight or nutritional deficiency).ti,ab.                                                                                                                                                                                                                                                                                                                                                                                                        |
|                                                                                                                                                                                                                                                                                                                                                          | 23 exp body weight/                                                                                                                                                                                                                                                                                                                                                                                                                                                                                                                                                                       |
|                                                                                                                                                                                                                                                                                                                                                          | 24 exp obesity/                                                                                                                                                                                                                                                                                                                                                                                                                                                                                                                                                                           |
|                                                                                                                                                                                                                                                                                                                                                          | 25 exp neoplasm/                                                                                                                                                                                                                                                                                                                                                                                                                                                                                                                                                                          |
|                                                                                                                                                                                                                                                                                                                                                          | 26 sleep.ti,ab.                                                                                                                                                                                                                                                                                                                                                                                                                                                                                                                                                                           |
|                                                                                                                                                                                                                                                                                                                                                          | 27 insomnia.ti,ab.                                                                                                                                                                                                                                                                                                                                                                                                                                                                                                                                                                        |
|                                                                                                                                                                                                                                                                                                                                                          | 28 26. 1 or 2 or 3 or 4 or 5 or 6 or 7 or 8 or 9 or 10 or 11 or 12 or 13 or 14 or 15 or 16 or 17 or 18 or 19 or 20 or 21 or 22 or 23 or 24 or 25 or 26 or 27                                                                                                                                                                                                                                                                                                                                                                                                                              |
| Green space                                                                                                                                                                                                                                                                                                                                              | 29 (Green space* or greenspace* or green?ess or greener*).ti,ab.                                                                                                                                                                                                                                                                                                                                                                                                                                                                                                                          |
|                                                                                                                                                                                                                                                                                                                                                          | 30 (green infrastructure or wilderness or wild land or natural land).ti,ab.                                                                                                                                                                                                                                                                                                                                                                                                                                                                                                               |
|                                                                                                                                                                                                                                                                                                                                                          | 31 (municipal land or community land or public land or open land or wild space or municipal space or natural space or municipal park or botanic park or park access or wild area or natural area* or green area* or woodland or shinrin-yoku or forest bathing or tree canopy).ti,ab.                                                                                                                                                                                                                                                                                                     |
|                                                                                                                                                                                                                                                                                                                                                          | 33 (urban adj3 (park* or garden* or parkland* or horticultur* or forest* or botanical or arboretum or Allotment)).ti,ab.                                                                                                                                                                                                                                                                                                                                                                                                                                                                  |
|                                                                                                                                                                                                                                                                                                                                                          | 34 (city park or park availability or public garden).ti,ab.                                                                                                                                                                                                                                                                                                                                                                                                                                                                                                                               |
|                                                                                                                                                                                                                                                                                                                                                          | 35 (natural adj3 facilities).ti,ab.                                                                                                                                                                                                                                                                                                                                                                                                                                                                                                                                                       |
|                                                                                                                                                                                                                                                                                                                                                          | 36 (vegetation adj3 natural).ti,ab.                                                                                                                                                                                                                                                                                                                                                                                                                                                                                                                                                       |
|                                                                                                                                                                                                                                                                                                                                                          | 37 (belt adj3 green).ti,ab.                                                                                                                                                                                                                                                                                                                                                                                                                                                                                                                                                               |
|                                                                                                                                                                                                                                                                                                                                                          | 38 (trial adj3 recreation).ti,ab.                                                                                                                                                                                                                                                                                                                                                                                                                                                                                                                                                         |
|                                                                                                                                                                                                                                                                                                                                                          | 39 (Trail adj3 (green or cycl* or walk)).ti,ab.                                                                                                                                                                                                                                                                                                                                                                                                                                                                                                                                           |

## Geographical settings

- 40 (open adj1 space).ti,ab.
- 41 29 or 30 or 31 or 32 or 33 or 34 or 35 or 36 or 37 or 38 or 39 or 40
- 42 exp Australia/
- 43 ("South East\* Asia\*" or "West\* Pacific" or Australian\*).ti,ab.
- 44 exp Brunei/
- 45 Bruneian\*.ti,ab.
- 46 exp Cambodia/
- 47 Cambodian\*.ti,ab.
- 48 exp China/
- 49 Chinese.ti,ab.
- 50 Cook Islands.ti,ab.
- 51 Cook Islander\*.ti,ab.
- 52 exp Fiji/
- 53 exp Japan/
- 54 Japanese.ti,ab.
- 55 ("Federated States" adj2 Micronesia).ti,ab.
- 56 Chuukese\*.ti,ab.
- 57 (Kosraean\* or Pohnpeian\* or Yapese\* or tuvalu).ti,ab.
- 58 (Kiribati or Kiribatian\* or Marshall Island or Marshall Islander\*).ti,ab.
- 59 exp Laos/
- 60 Lao.ti,ab.
- 61 exp Malaysia/
- 62 Malaysian\*.ti,ab.
- 63 Malay\*.ti,ab.
- 64 exp Mongolia/
- 65 Mongolian\*.ti,ab.
- 66 Nauru.ti,ab.
- 67 Nauruan\*.ti,ab.
- 68 exp New Zealand/
- 69 (New Zealander\* or Niue or Niuean\*).ti,ab.
- 70 exp Palau/
- 71 Palauan\*.ti,ab.
- 72 exp Papua New Guinea/
- 73 Papuan\*.ti,ab.
- 74 exp Philippines/
- 75 (Philippines or Philippine\* or Filipino\*).ti,ab.
- 76 exp Republic of Korea/
- 77 Korean\*.ti,ab.
- 78 exp Samoa/
- 79 Samoan\*.ti,ab.
- 8 exp Singapore/
- 81 Singaporean\*.ti,ab.
- 82 (Solomon Islands or Solomon Islander\*).ti,ab.
- 83 exp Tonga/
- 84 exp Vanuatu/
- 85 exp VietNam/
- 86 Vietnamese.ti,ab.
- 87 (Indonesian\* or Sri Lankan\* or Thai or Timorese or Bangladeshi\* or Bhutanese or Indian or Maldivian\* or Burmese or Nepali\* or Fijian\*).ti,ab.
- 88 exp Indonesia/
- 89 exp Sri Lanka/
- 90 exp Thailand/
- 91 exp Timor-Leste/
- 92 exp Bangladesh/
- 93 exp Bhutan/
- 94 "Democratic People's Republic of Korea"/
- 95 Korea.ti,ab.
- 96 exp India/
- 97 exp Maldives/
- 98 exp Myanmar/
- 99 exp Nepal/

|                                            |                                                                                                                                                                                                                                                                                                                                                                                                                                                                                                                                        |
|--------------------------------------------|----------------------------------------------------------------------------------------------------------------------------------------------------------------------------------------------------------------------------------------------------------------------------------------------------------------------------------------------------------------------------------------------------------------------------------------------------------------------------------------------------------------------------------------|
| 100                                        | (australia or brunei or cambodia or china or fiji or japan or laos or malaysia or mongolia or "New Zealand" or "Palau" or "Papua New Guinea" or philippines or korea or samoa or singapore or tonga or tuvalu or vanuatu or vietnam or indonesia or "Sri Lanka" or thailand or "East Timor" or "Timor-Leste" or bangladesh or bhutan or india or maldives or myanmar or nepal or "Christmas Island" or khmer or kampuchea or sabah or sarawak or philippines or philippines or philipines or "Navigator Island*" or "Viet Nam").ti.ab. |
| 101                                        | 42 or 43 or 44 or 45 or 46 or 47 or 48 or 49 or 50 or 51 or 52 or 53 or 54 or 55 or 56 or 57 or 58 or 59 or 60 or 61 or 62 or 63 or 64 or 65 or 66 or 67 or 68 or 69 or 70 or 71 or 72 or 73 or 74 or 75 or 76 or 77 or 78 or 79 or 80 or 81 or 82 or 83 or 84 or 85 or 86 or 87 or 88 or 89 or 90 or 91 or 92 or 93 or 94 or 95 or 96 or 97 or 98 or 99                                                                                                                                                                               |
| 101                                        | 28 and 41 and 102                                                                                                                                                                                                                                                                                                                                                                                                                                                                                                                      |
| 102                                        | limit 102 to (human and english language)                                                                                                                                                                                                                                                                                                                                                                                                                                                                                              |
| <b>CINALH via EBSCO – 25 November 2020</b> |                                                                                                                                                                                                                                                                                                                                                                                                                                                                                                                                        |
| S1                                         | ( TI(disorder* or infection* or disabilit* or symptom* or pain* or death* or injur* or Illness*) ) OR ( AB(disorder* or infection* or disabilit* or symptom* or pain* or death* or injur* or Illness*) )                                                                                                                                                                                                                                                                                                                               |
| S2                                         | MH"health+"                                                                                                                                                                                                                                                                                                                                                                                                                                                                                                                            |
| S3                                         | (MH "disease+")                                                                                                                                                                                                                                                                                                                                                                                                                                                                                                                        |
| S4                                         | MH"Menopause+"                                                                                                                                                                                                                                                                                                                                                                                                                                                                                                                         |
| S5                                         | ( IT(menopaus* or perimenopaus* or "peri-menopaus*" or premenopaus* or "pre-menopaus*" or climacteric)) OR ( AB(menopaus* or perimenopaus* or "peri-menopaus*" or premenopaus* or "pre-menopaus*" or climacteric) )                                                                                                                                                                                                                                                                                                                    |
| S6                                         | ( IT("pubertal timing" or "puberty timing" or "sexual precocity" or "sexual prematurity" or "precocious puberty" or "premature pubarche" or "premature thelarche" or "menarche" or "first spermatorrhea" ) ) OR ( AB("pubertal timing" or "puberty timing" or "sexual precocity" or "sexual prematurity" or "precocious puberty" or "premature pubarche" or "premature thelarche" or "menarche" or "first spermatorrhea") )                                                                                                            |
| S7                                         | ( IT("otitis media" or "food-borne trematodiasis") ) ) OR ( AB("otitis media" or "food-borne trematodiasis") )                                                                                                                                                                                                                                                                                                                                                                                                                         |
| S8                                         | IT(maternal n3 complication*) OR AB(maternal n3 complication*)                                                                                                                                                                                                                                                                                                                                                                                                                                                                         |
| S9                                         | IT(pregnancy n3 complica*) OR AB(pregnancy n3 complica*) OR TI(maternal n3 problem*). OR AB(maternal n3 problem*)                                                                                                                                                                                                                                                                                                                                                                                                                      |
| S10                                        | ( IT("obstructed labo#r" or abortion or "birth complication*" or neonatal or "birth asphyxia" or "birth trauma" or "birth sepsis" or "birth weight" ) ) OR ( AB("obstructed labo#r" or abortion or "birth complication*" or neonatal or "birth asphyxia" or "birth trauma" or "birth sepsis" or "birth weight" ) )                                                                                                                                                                                                                     |
| S11                                        | ( TI((pregnancy or birth) n outcome*) ) OR ( AB((pregnancy or birth) n outcome*) )                                                                                                                                                                                                                                                                                                                                                                                                                                                     |
| S12                                        | ( TI("congenital anomal*" or "neural tube defect*" or "congenital heart" or infertile* or Miscarriage) ) OR ( AB("congenital anomal*" or "neural tube defect*" or "congenital heart" or infertile* or Miscarriage) )                                                                                                                                                                                                                                                                                                                   |
| S13                                        | ( TI(fertility or infertility) ) OR ( AB(fertility or infertility) ) OR ( TI(cancer* or "melanoma" or "non-Hodgkin lymphoma" or leuk*mia or neoplasm*) ) OR ( AB(cancer* or "melanoma" or "non-Hodgkin lymphoma" or leuk*mia or neoplasm*) ) OR ( TI(cardiomyopathy or myocarditis or "atrial fibrillation" or "atrial flutter*" or "aortic aneurysm" or endocarditis or cardiovascular or hypertens* or "blood pressure" or dyslipidemia* or Hyperlipidemia* or vascular or "insulin resistanc*" or dyslipidaemia* o ...              |
| S14                                        | ( TI("life expectancy" or "quality of life" or psychological or Mental or Well-being or emotion or Depress* or anxi* or attention or stress* or Fear* or Restorati* or ruminat* or affect* or rustrate* or agress* or lonely or loneliness or isolation or happy or happiness or resilien* or optimis* or hope* or empower*) ) OR ( AB("life expectancy" or "quality of life" or psychological or Mental or Well-being or emotion or Depress* or anxi* or attention or stress* or Fear* or Restorati* or ruminat* or ...               |
| S15                                        | TI (incident* or accident* or gout or drowning or poisoning* or "exposure to mechanical forces" or "adverse effect* of medical treatment" or "animal contact" or "health outcome*" or "health stat*" or mortalit* or morbidit* or "life expectanc*" or stroke* or "quality#adjusted life year*" or daly* or qaly* or "physiological effect*" or "motor development*" or "heart rate variability" or "physical function" or "cognitive function" or thyroid or metabolic or inflammat* or degenerative or "ischaemic ...                |
| S16                                        | ( TI (autoimmun* or pneumoconiosis or respiratory or asthma or pulmonary or cirrhosis or hepati* or "peptic ulcer*" or gastritis or duodenitis or appendicitis or "paralytic ileus" or "intestinal obstruction*" or hernia* or pancreatitis or Alzheimer's or dementia or Parkinson's or epilepsy or "multiple sclerosis" or migraine* or headache* or schizophrenia or glomerulonephritis or urinary or h*moglobinopath* or "an*mia") ) OR ( AB (autoimmun* or pneumoconiosis or respiratory or asthma or pulmonar ...                |
| S17                                        | ( TI ("body mass index" or adiposity or "waist to hip" or "body fat" or skinfold or "waist circumference" or "body composition" or overweight or "over*weight" or "nutritional deficiency") ) OR ( AB ("body mass index" or adiposity or "waist to hip" or "body fat" or skinfold or "waist circumference" or "body composition" or overweight or "over*weight" or "nutritional deficiency") )                                                                                                                                         |
| S18                                        | MH"obesity+" OR MH"body weight+" OR MH"neoplasm+"                                                                                                                                                                                                                                                                                                                                                                                                                                                                                      |
| S19                                        | TI sleep* OR TI insomnia* OR AB sleep* OR AB insomnia*                                                                                                                                                                                                                                                                                                                                                                                                                                                                                 |
| S20                                        | (S1 OR S2 OR S3 OR S4 OR S5 OR S6 OR S7 OR S8 OR S9 OR S10 OR S11 OR S12 OR S13 OR S14 OR S15 OR S16 OR S17 OR S18 OR S19)                                                                                                                                                                                                                                                                                                                                                                                                             |
| S21                                        | ( TI("Green space*" or greenspace* or green#ess or greener*) ) OR ( AB("Green space*" or greenspace* or green#ess or greener*) ) OR ( TI("green infrastructure" or wilderness or "wild land" or "natural land") ) OR ( AB("green infrastructure" or wilderness or "wild land" or "natural land") ) OR ( TI("municipal land" or "community land" or "public land" or "open land" or "wild space" or "municipal space" or "natural space" or "municipal park" or "botanic park" or "park access" or "wild area" or "na ...               |
| S22                                        | TI(urban n3 park*) OR AB(urban n3 park*)                                                                                                                                                                                                                                                                                                                                                                                                                                                                                               |

|                          |     |                                                                                                                                                                                                                                                                                                                                                                                                                                                                                                                                                                                                                                                                                                                                                                                                                                                                                                                                                                                                                                                                                                                                                                                                                                                                                                                                                                                                                                                                                                                                                                                                                                                                                                                                                                                                                                                                                                                                                                                                                                                                                                                                                                                                                                                                                                                                                                                                                                                                                                                                                                                                                                                                                                                                                                                                                                                                                                                                                                                                                                                                                                                                                                                                                                                                                                                                                                                                                                                                                                                                                                                                                                                             |
|--------------------------|-----|-------------------------------------------------------------------------------------------------------------------------------------------------------------------------------------------------------------------------------------------------------------------------------------------------------------------------------------------------------------------------------------------------------------------------------------------------------------------------------------------------------------------------------------------------------------------------------------------------------------------------------------------------------------------------------------------------------------------------------------------------------------------------------------------------------------------------------------------------------------------------------------------------------------------------------------------------------------------------------------------------------------------------------------------------------------------------------------------------------------------------------------------------------------------------------------------------------------------------------------------------------------------------------------------------------------------------------------------------------------------------------------------------------------------------------------------------------------------------------------------------------------------------------------------------------------------------------------------------------------------------------------------------------------------------------------------------------------------------------------------------------------------------------------------------------------------------------------------------------------------------------------------------------------------------------------------------------------------------------------------------------------------------------------------------------------------------------------------------------------------------------------------------------------------------------------------------------------------------------------------------------------------------------------------------------------------------------------------------------------------------------------------------------------------------------------------------------------------------------------------------------------------------------------------------------------------------------------------------------------------------------------------------------------------------------------------------------------------------------------------------------------------------------------------------------------------------------------------------------------------------------------------------------------------------------------------------------------------------------------------------------------------------------------------------------------------------------------------------------------------------------------------------------------------------------------------------------------------------------------------------------------------------------------------------------------------------------------------------------------------------------------------------------------------------------------------------------------------------------------------------------------------------------------------------------------------------------------------------------------------------------------------------------------|
| Geographical settings    | S23 | TI urban n3 parkland* OR AB urban n3 parkland* OR TI(urban w3 garden*) OR AB(urban n3 garden*) OR TI(urban n3 horticultur*) OR AB(urban n3 horticultur*) OR TI(Urban n3 forest*) OR AB(Urban n3 forest*) OR TI(Urban n3 botanical ) OR AB(urban n3 botanical) OR TI(Urban n3 arboretum ) OR AB(urban n3 arboretum )                                                                                                                                                                                                                                                                                                                                                                                                                                                                                                                                                                                                                                                                                                                                                                                                                                                                                                                                                                                                                                                                                                                                                                                                                                                                                                                                                                                                                                                                                                                                                                                                                                                                                                                                                                                                                                                                                                                                                                                                                                                                                                                                                                                                                                                                                                                                                                                                                                                                                                                                                                                                                                                                                                                                                                                                                                                                                                                                                                                                                                                                                                                                                                                                                                                                                                                                         |
|                          | S24 | TI (urban n3 Allotment) OR AB (urban n3 Allotment)                                                                                                                                                                                                                                                                                                                                                                                                                                                                                                                                                                                                                                                                                                                                                                                                                                                                                                                                                                                                                                                                                                                                                                                                                                                                                                                                                                                                                                                                                                                                                                                                                                                                                                                                                                                                                                                                                                                                                                                                                                                                                                                                                                                                                                                                                                                                                                                                                                                                                                                                                                                                                                                                                                                                                                                                                                                                                                                                                                                                                                                                                                                                                                                                                                                                                                                                                                                                                                                                                                                                                                                                          |
|                          | S25 | ( TI ("city park" or "park availability" or "public garden") ) OR ( AB ("city park" or "park availability" or "public garden") )                                                                                                                                                                                                                                                                                                                                                                                                                                                                                                                                                                                                                                                                                                                                                                                                                                                                                                                                                                                                                                                                                                                                                                                                                                                                                                                                                                                                                                                                                                                                                                                                                                                                                                                                                                                                                                                                                                                                                                                                                                                                                                                                                                                                                                                                                                                                                                                                                                                                                                                                                                                                                                                                                                                                                                                                                                                                                                                                                                                                                                                                                                                                                                                                                                                                                                                                                                                                                                                                                                                            |
|                          | S26 | TI (natural n3 facilities) OR AB (natural n3 facilities) OR TI(vegetation n3 natural) OR AB(vegetation n3 natural) OR TI(belt n3 green) OR AB(belt n3 green) OR TI(trail n3 recreation) OR AB(trail n3 recreation)                                                                                                                                                                                                                                                                                                                                                                                                                                                                                                                                                                                                                                                                                                                                                                                                                                                                                                                                                                                                                                                                                                                                                                                                                                                                                                                                                                                                                                                                                                                                                                                                                                                                                                                                                                                                                                                                                                                                                                                                                                                                                                                                                                                                                                                                                                                                                                                                                                                                                                                                                                                                                                                                                                                                                                                                                                                                                                                                                                                                                                                                                                                                                                                                                                                                                                                                                                                                                                          |
|                          | S27 | TI(Trail n3 green) OR AB(trail n3 green) OR TI(trail n3 cycl*) OR AB(trail n3 cycl*) OR TI(trail n3 walk) OR AB(trail n3 walk)                                                                                                                                                                                                                                                                                                                                                                                                                                                                                                                                                                                                                                                                                                                                                                                                                                                                                                                                                                                                                                                                                                                                                                                                                                                                                                                                                                                                                                                                                                                                                                                                                                                                                                                                                                                                                                                                                                                                                                                                                                                                                                                                                                                                                                                                                                                                                                                                                                                                                                                                                                                                                                                                                                                                                                                                                                                                                                                                                                                                                                                                                                                                                                                                                                                                                                                                                                                                                                                                                                                              |
|                          | S28 | TI(open n1 space) OR AB(open n1 space)                                                                                                                                                                                                                                                                                                                                                                                                                                                                                                                                                                                                                                                                                                                                                                                                                                                                                                                                                                                                                                                                                                                                                                                                                                                                                                                                                                                                                                                                                                                                                                                                                                                                                                                                                                                                                                                                                                                                                                                                                                                                                                                                                                                                                                                                                                                                                                                                                                                                                                                                                                                                                                                                                                                                                                                                                                                                                                                                                                                                                                                                                                                                                                                                                                                                                                                                                                                                                                                                                                                                                                                                                      |
|                          | S29 | MH"Australia+" OR MH"Brunei+" OR MH"Cambodia+" OR MH"China+" OR MH"Fiji+" OR MH"Japan+" OR MH"Laos+" OR MH"Malaysia+" OR MH"Mongolia+" OR MH"New Zealand+" OR MH"Palau+" OR MH"Papua New Guinea+" OR MH"Philippines+" OR MH"South Korea+" OR MH"North Korea+" OR MH"Korea+" OR MH"Samoa+" OR MH"Singapore+" OR MH"Tonga+" OR MH"Vanuatu+" OR MH"VietNam+" OR MH"Indonesia+" OR MH"Sri Lanka+" OR MH"Thailand+" OR MH"East Timor+" OR MH"Bangladesh+" OR MH"Bhutan+" OR MH"India+" OR ( MH"Maldives+" OR MH"Myanmar+" OR MH"Nepal+" )                                                                                                                                                                                                                                                                                                                                                                                                                                                                                                                                                                                                                                                                                                                                                                                                                                                                                                                                                                                                                                                                                                                                                                                                                                                                                                                                                                                                                                                                                                                                                                                                                                                                                                                                                                                                                                                                                                                                                                                                                                                                                                                                                                                                                                                                                                                                                                                                                                                                                                                                                                                                                                                                                                                                                                                                                                                                                                                                                                                                                                                                                                                        |
|                          | S30 | ( TI("South East* Asia*" OR "West* Pacific" OR Australian* or Bruneian* or Cambodian* or Chinese or "Cook Islands" or "Cook Islander*" or Japanese or chuukese* or Kosraean* or Pohnpeian* or Yapese* or Kiribati or Kiribatian* or "Marshall Island" or "Marshall Islander*" or Tuvalu ) OR ( AB("South East* Asia*" OR "West* Pacific" OR Australian* or Bruneian* or Cambodian* or Chinese or "Cook Islands" or "Cook Islander*" or Japanese or chuukese* or Kosraean* or Pohnpeian* or Yapese* or Kiribati ...                                                                                                                                                                                                                                                                                                                                                                                                                                                                                                                                                                                                                                                                                                                                                                                                                                                                                                                                                                                                                                                                                                                                                                                                                                                                                                                                                                                                                                                                                                                                                                                                                                                                                                                                                                                                                                                                                                                                                                                                                                                                                                                                                                                                                                                                                                                                                                                                                                                                                                                                                                                                                                                                                                                                                                                                                                                                                                                                                                                                                                                                                                                                          |
|                          | S31 | ( TI(Indonesian* or "Sri Lankan*" or Thai or Timorese or Bangladeshi* or Bhutanese or Indian or Maldivian* or Burmese or Nepali* or Fijian*) ) OR ( AB(Indonesian* or "Sri Lankan*" or Thai or Timorese or Bangladeshi* or Bhutanese or Indian or Maldivian* or Burmese or Nepali* or Fijian). )                                                                                                                                                                                                                                                                                                                                                                                                                                                                                                                                                                                                                                                                                                                                                                                                                                                                                                                                                                                                                                                                                                                                                                                                                                                                                                                                                                                                                                                                                                                                                                                                                                                                                                                                                                                                                                                                                                                                                                                                                                                                                                                                                                                                                                                                                                                                                                                                                                                                                                                                                                                                                                                                                                                                                                                                                                                                                                                                                                                                                                                                                                                                                                                                                                                                                                                                                            |
|                          | S32 | TI("Federated States" n2 Micronesia) OR AB("Federated States" n2 Micronesia)                                                                                                                                                                                                                                                                                                                                                                                                                                                                                                                                                                                                                                                                                                                                                                                                                                                                                                                                                                                                                                                                                                                                                                                                                                                                                                                                                                                                                                                                                                                                                                                                                                                                                                                                                                                                                                                                                                                                                                                                                                                                                                                                                                                                                                                                                                                                                                                                                                                                                                                                                                                                                                                                                                                                                                                                                                                                                                                                                                                                                                                                                                                                                                                                                                                                                                                                                                                                                                                                                                                                                                                |
| Health outcomes          | S33 | S21 OR S21 OR S22 OR S23 OR S24 OR S25 OR S26 OR S28                                                                                                                                                                                                                                                                                                                                                                                                                                                                                                                                                                                                                                                                                                                                                                                                                                                                                                                                                                                                                                                                                                                                                                                                                                                                                                                                                                                                                                                                                                                                                                                                                                                                                                                                                                                                                                                                                                                                                                                                                                                                                                                                                                                                                                                                                                                                                                                                                                                                                                                                                                                                                                                                                                                                                                                                                                                                                                                                                                                                                                                                                                                                                                                                                                                                                                                                                                                                                                                                                                                                                                                                        |
|                          | S34 | S29 OR S29 OR S30 OR S31 OR S33                                                                                                                                                                                                                                                                                                                                                                                                                                                                                                                                                                                                                                                                                                                                                                                                                                                                                                                                                                                                                                                                                                                                                                                                                                                                                                                                                                                                                                                                                                                                                                                                                                                                                                                                                                                                                                                                                                                                                                                                                                                                                                                                                                                                                                                                                                                                                                                                                                                                                                                                                                                                                                                                                                                                                                                                                                                                                                                                                                                                                                                                                                                                                                                                                                                                                                                                                                                                                                                                                                                                                                                                                             |
|                          | S35 | S19 AND S34 AND S35                                                                                                                                                                                                                                                                                                                                                                                                                                                                                                                                                                                                                                                                                                                                                                                                                                                                                                                                                                                                                                                                                                                                                                                                                                                                                                                                                                                                                                                                                                                                                                                                                                                                                                                                                                                                                                                                                                                                                                                                                                                                                                                                                                                                                                                                                                                                                                                                                                                                                                                                                                                                                                                                                                                                                                                                                                                                                                                                                                                                                                                                                                                                                                                                                                                                                                                                                                                                                                                                                                                                                                                                                                         |
|                          | S36 |                                                                                                                                                                                                                                                                                                                                                                                                                                                                                                                                                                                                                                                                                                                                                                                                                                                                                                                                                                                                                                                                                                                                                                                                                                                                                                                                                                                                                                                                                                                                                                                                                                                                                                                                                                                                                                                                                                                                                                                                                                                                                                                                                                                                                                                                                                                                                                                                                                                                                                                                                                                                                                                                                                                                                                                                                                                                                                                                                                                                                                                                                                                                                                                                                                                                                                                                                                                                                                                                                                                                                                                                                                                             |
| Scopus– 25 November 2020 |     |                                                                                                                                                                                                                                                                                                                                                                                                                                                                                                                                                                                                                                                                                                                                                                                                                                                                                                                                                                                                                                                                                                                                                                                                                                                                                                                                                                                                                                                                                                                                                                                                                                                                                                                                                                                                                                                                                                                                                                                                                                                                                                                                                                                                                                                                                                                                                                                                                                                                                                                                                                                                                                                                                                                                                                                                                                                                                                                                                                                                                                                                                                                                                                                                                                                                                                                                                                                                                                                                                                                                                                                                                                                             |
| Green Space Exposure     | #1  | (( INDEXTERMS (obesity ) OR INDEXTERMS ( "body weight" ) ) OR ( ( TITLE-ABS-KEY ( disorder* OR infection* OR disabilit* OR symptom* OR pain* OR death* OR injur* OR illness* ) ) OR ( INDEXTERMS ( health ) ) OR ( INDEXTERMS ( disease ) ) OR ( INDEXTERMS ( menopause ) ) OR ( TITLE-ABS ( menopaus* OR perimenopaus* OR peri-menopaus* OR premenopaus* OR pre-menopaus* OR climacteric ) ) OR ( TITLE-ABS ( "pubertal timing" OR "puberty timing" OR "sexual precocity" OR "sexual prematurity" OR "precocious puberty" OR "premature pubarche" OR "premature thelarche" OR "menarche" OR "first spermatorrhoea" OR "otitis media" OR "food-borne trematodiasis" ) ) OR ( TITLE-ABS ( maternal W/3 complication* ) ) OR ( TITLE-ABS ( ( pregnancy W/3 complica* ) OR ( maternal W/3 problem* ) ) ) OR ( TITLE-ABS ( "obstructed labo*r" OR abortion OR "birth complication*" OR neonatal OR "birth asphyxia" OR "birth trauma" OR "birth sepsis" OR "birth weight" ) ) OR ( TITLE-ABS ( ( pregnancy OR birth ) W/1 outcome* ) ) OR ( TITLE-ABS ( "congenital anomal*" OR "neural tube defect*" OR "congenital heart" OR infertile* OR miscarriage OR fertility OR infertility OR cancer* OR "melanoma" OR "non-Hodgkin lymphoma" OR leuk*mia OR neoplasm* OR cardiomyopathy OR myocarditis OR "atrial fibrillation" OR "atrial flutter*" OR "aortic aneurysm" OR endocarditis OR cardiovascular OR hypertens* OR "blood pressure" OR dyslipidemia* OR hyperlipidemia* OR vascular OR "insulin resistanc*" OR dyslipidaemia* OR coronary OR cardio* OR cardiac OR stroke OR "transient ischaemic attack*" OR diabet* OR "blood glucose" ) ) OR ( TITLE-ABS ( "life expectancy" OR "quality of life" OR psychological OR mental OR "well-being" OR emotion OR depress* OR anxi* OR attention OR stress* OR fear* OR restorati* OR ruminat* OR affect* OR rustrate* OR agre ss* OR lonely OR loneliness OR isolation OR happy OR happiness OR resilien* OR optimis* OR hope* OR empower* OR mood* OR p anic OR dysthymic OR bipolar OR cyclothymic OR phobia OR "obsessive-compulsive" OR somatisation OR somatoform OR hypochondriasis OR "body dysmorphic" OR factitious OR depersonalization OR dissociative OR arthritis OR osteoarthritis ) ) OR ( TITLE-ABS ( incident* OR accident* OR gout OR drowning OR poisoning* OR "exposure to mechanical forces" OR "adverse effect* of medical treatment" OR "animal contact" OR "health outcome*" OR "health stat*" OR mortalit* OR morbidity* OR "life expectanc*" OR stroke* OR "quality adjusted life year*" OR daly* OR qaly* OR "physiological effect*" OR "motor development*" OR "heart rate variability" OR "physical function" OR "cognitive function" OR thyroid OR metabolic OR inflammat* OR degenerative OR "ischaemic heart" OR "bone density" OR impoten* OR autoimmun* OR pneumoconiosis OR respiratory OR asthma OR pulmonary OR cirrhosis OR hepati* OR "pept ic ulcer*" OR gastritis OR duodenitis OR appendicitis OR "paralytic ileus" OR "intestinal obstruction*" OR hernia* OR pancreatitis OR epilepsy OR "multiple sclerosis" OR migraine* OR headache* OR schizophrenia OR glomerulonephritis OR urinary OR haemoglobinopath* OR "anaemia*" OR h emoglobinopath* OR "anemia*" OR alzheimer's OR dementia OR parkinson's ) ) OR ( TITLE-ABS ( "body mass index" OR adiposity OR "waist to hip" OR "body fat" OR skinfold OR "waist circumference" OR "body composition" OR overweight OR "over weight" OR "nutritional deficiency" ) ) ) OR ( TITLE-ABS ( health OR disease* OR postmenopaus* OR obesity OR obese OR "body weight" ) ) OR ( TITLE-ABS ( sleep* OR insomnia* ) ) ) |
|                          | #2  | ( TITLE-ABS ( "Green space*" OR greenspace* OR green\$ess OR greener* OR "green infrastructure" OR wilderness OR "wild land" OR "natural land" OR "municipal land" OR "community land" OR "public land" OR "open land" OR "wild space" OR "municipal space" OR "natural space" OR "municipal park" OR "botanic park" OR "park access" OR "wild area" OR "natural area*" OR "green area*" OR woodland OR shinrin-yoku OR "forest bathing" OR "tree canopy" ) ) OR ( TITLE-ABS ( urban W/3 ( park* OR garden* OR parkland* OR horticultur* OR forest* OR botanical OR arboretum OR allotment ) ) ) OR ( TITLE-ABS ( "city park" OR "park availability" OR "public garden" ) ) OR ( TITLE-ABS ( ( natural W/3 facilities ) OR ( vegetation W/3 natural ) OR ( belt W/3 green ) OR ( trial W/3 recreation ) ) ) OR ( TITLE-ABS ( ( trail W/3 green ) OR ( trail W/3 cycl* ) OR ( trail W/3 walk ) OR ( open W/1 space ) ) )                                                                                                                                                                                                                                                                                                                                                                                                                                                                                                                                                                                                                                                                                                                                                                                                                                                                                                                                                                                                                                                                                                                                                                                                                                                                                                                                                                                                                                                                                                                                                                                                                                                                                                                                                                                                                                                                                                                                                                                                                                                                                                                                                                                                                                                                                                                                                                                                                                                                                                                                                                                                                                                                                                                                     |



|                       |    |                                                                                                                                                                                                                                                                                                                                                                                                                                                                                                                                                                                                                                                                                                                                                                                                                                                                                                                                                                                                                                                                                                                                                                                                                                                                                                                                                                                                                                                                                                                                                                                                                                                                                                                                                                                                                                                                                                                                                                                                                                                                                                                                                                                                                                                                                                                                                                                                                 |
|-----------------------|----|-----------------------------------------------------------------------------------------------------------------------------------------------------------------------------------------------------------------------------------------------------------------------------------------------------------------------------------------------------------------------------------------------------------------------------------------------------------------------------------------------------------------------------------------------------------------------------------------------------------------------------------------------------------------------------------------------------------------------------------------------------------------------------------------------------------------------------------------------------------------------------------------------------------------------------------------------------------------------------------------------------------------------------------------------------------------------------------------------------------------------------------------------------------------------------------------------------------------------------------------------------------------------------------------------------------------------------------------------------------------------------------------------------------------------------------------------------------------------------------------------------------------------------------------------------------------------------------------------------------------------------------------------------------------------------------------------------------------------------------------------------------------------------------------------------------------------------------------------------------------------------------------------------------------------------------------------------------------------------------------------------------------------------------------------------------------------------------------------------------------------------------------------------------------------------------------------------------------------------------------------------------------------------------------------------------------------------------------------------------------------------------------------------------------|
| Geographical settings | #3 | <p>( TITLE-ABS ( australia OR brunei OR cambodia OR china OR fiji OR japan OR laos OR malaysia OR mongolia OR "New Zealand" OR "Palau" OR "Papua New Guinea" OR philippines OR korea OR samoa OR singapore OR tonga OR tuvalu OR vanuatu OR vietnam OR indonesia OR "Sri Lanka" OR thailand OR "East Timor" OR "Timor-Leste" OR bangladesh OR bhutan OR india OR maldives OR myanmar OR nepal OR "Christmas Island" OR khmer OR kampuchea OR sabah OR sarawak OR philippines OR philippines OR philippines OR "Navigator Island*" OR "Viet Nam" ) ) OR ( TITLE-ABS ( "South east* Asia*" OR "West* Pacific" ) ) OR ( ( TITLE-ABS ( "Federated States" W/2 micronesia ) ) OR ( TITLE-ABS ( australian* OR bruneian* OR cambodian* OR chinese OR "Cook Islands" OR "Cook Islander*" OR japanese OR chuukese* OR kosraean* OR pohnpeian* OR yapese* OR kiribati OR kiribatian* OR "Marshall Island" OR "Marshall Islander*" OR "Lao" OR malaysian* OR malay* OR mongolian* OR nauru OR nauruan* OR "New Zealander*" OR niue OR niuean* OR palauan* OR papuan* OR philippines OR philippine* OR filipino* OR korean* OR samoa* OR singaporean* OR "Solomon Islands" OR "Solomon Islander*" OR indonesian* OR "Sri Lankan*" OR thai OR timorese OR bangladeshi* OR bhutanese OR indian OR maldivian* OR burmese OR nepali* OR fijian* ) ) OR ( ( INDEXTERMS ( "South Korea" ) OR INDEXTERMS ( korea ) OR INDEXTERMS ( samoa ) OR INDEXTERMS ( "Republic of Korea" ) OR INDEXTERMS ( "Sri Lanka" ) OR INDEXTERMS ( vietnam ) OR INDEXTERMS ( "Viet Nam" ) OR INDEXTERMS ( "East Timor" ) OR INDEXTERMS ( timor-leste ) ) OR ( ( ( INDEXTERMS ( "north korea" ) ) OR ( INDEXTERMS ( "democratic people's republic of korea" ) ) ) OR ( INDEXTERMS ( australia ) OR INDEXTERMS ( brunei ) OR INDEXTERMS ( cambodia ) OR INDEXTERMS ( china ) OR INDEXTERMS ( fiji ) OR INDEXTERMS ( japan ) OR INDEXTERMS ( laos ) OR INDEXTERMS ( malaysia ) OR INDEXTERMS ( mongolia ) OR INDEXTERMS ( "New Zealand" ) ) OR ( INDEXTERMS ( palau ) OR INDEXTERMS ( "Papua New Guinea" ) OR INDEXTERMS ( singapore ) OR INDEXTERMS ( tonga ) OR INDEXTERMS ( vanuatu ) OR INDEXTERMS ( indonesia ) OR INDEXTERMS ( thailand ) OR INDEXTERMS ( bangladesh ) OR INDEXTERMS ( bhutan ) OR INDEXTERMS ( india ) OR INDEXTERMS ( maldives ) OR INDEXTERMS ( myanmar ) OR INDEXTERMS ( nepal ) OR ( INDEXTERMS ( philippines ) ) ) ) ) )</p> |
|                       | #4 | #1 AND #2 AND #3                                                                                                                                                                                                                                                                                                                                                                                                                                                                                                                                                                                                                                                                                                                                                                                                                                                                                                                                                                                                                                                                                                                                                                                                                                                                                                                                                                                                                                                                                                                                                                                                                                                                                                                                                                                                                                                                                                                                                                                                                                                                                                                                                                                                                                                                                                                                                                                                |
|                       | #5 | #4 LIMIT-TO ( LANGUAGE , "English" )                                                                                                                                                                                                                                                                                                                                                                                                                                                                                                                                                                                                                                                                                                                                                                                                                                                                                                                                                                                                                                                                                                                                                                                                                                                                                                                                                                                                                                                                                                                                                                                                                                                                                                                                                                                                                                                                                                                                                                                                                                                                                                                                                                                                                                                                                                                                                                            |

**Table S2. Quality assessment of included publications (n=83).** For the list of questions assessed for each type of studies, see <https://www.nhlbi.nih.gov/health-topics/study-quality-assessment-tools>.

| a. Observational cohort and cross-sectional studies |    |    |    |    |    |    |    |    |    |     |     |     |     |     |             |                  |       |                              |
|-----------------------------------------------------|----|----|----|----|----|----|----|----|----|-----|-----|-----|-----|-----|-------------|------------------|-------|------------------------------|
| Study (Author year)                                 | Q1 | Q2 | Q3 | Q4 | Q5 | Q6 | Q7 | Q8 | Q9 | Q10 | Q11 | Q12 | Q13 | Q14 | Total score | Total applicable | Ratio | Ranking (low, fair, or high) |
| Bao 2021 <sup>(1)</sup>                             | Y  | Y  | Y  | Y  | N  | N  | N  | Y  | Y  | NA  | Y   | Y   | Y   | Y   | 10          | 13               | 0.77  | High                         |
| Chang 2019 <sup>(2)</sup>                           | Y  | Y  | NR | Y  | N  | N  | N  | N  | N  | N   | Y   | N   | Y   | N   | 5           | 14               | 0.36  | Low                          |
| Chen 2017 <sup>(3)</sup>                            | Y  | Y  | NA | Y  | N  | N  | N  | N  | N  | N   | N   | N   | NR  | Y   | 4           | 13               | 0.31  | Low                          |
| Chen 2019 <sup>(4)</sup>                            | Y  | Y  | NR | Y  | N  | N  | N  | N  | Y  | N   | N   | Y   | N   | Y   | 6           | 14               | 0.43  | Low                          |
| Chen 2020 <sup>(5)</sup>                            | Y  | Y  | NA | Y  | NA | N  | NA | N  | Y  | NA  | Y   | Y   | NA  | Y   | 7           | 9                | 0.78  | High                         |
| Dong 2017 <sup>(6)</sup>                            | Y  | Y  | NR | Y  | N  | N  | N  | N  | N  | N   | Y   | N   | Y   | Y   | 6           | 14               | 0.43  | low                          |
| Fan 2019 <sup>(7)</sup>                             | Y  | Y  | Y  | Y  | N  | N  | N  | Y  | Y  | N   | Y   | NR  | y   | N   | 8           | 14               | 0.57  | Fair                         |
| Fan 2020a <sup>(8)</sup>                            | Y  | Y  | Y  | Y  | N  | N  | N  | Y  | Y  | N   | Y   | NR  | Y   | N   | 8           | 14               | 0.57  | Fair                         |
| Fan 2020b <sup>(9)</sup>                            | Y  | Y  | Y  | Y  | N  | Y  | N  | Y  | Y  | Y   | Y   | NR  | Y   | Y   | 11          | 14               | 0.79  | High                         |
| Helbich 2019 <sup>(10)</sup>                        | Y  | Y  | NR | Y  | N  | N  | N  | Y  | Y  | N   | Y   | Y   | Y   | Y   | 9           | 14               | 0.64  | Fair                         |
| Huang 2019 <sup>(11)</sup>                          | Y  | Y  | Y  | Y  | N  | N  | N  | Y  | Y  | N   | N   | Y   | Y   | Y   | 9           | 14               | 0.64  | Fair                         |
| Huang 2020a <sup>(12)</sup>                         | Y  | Y  | NR | Y  | N  | N  | N  | Y  | Y  | N   | N   | Y   | NR  | Y   | 7           | 14               | 0.50  | Fair                         |
| Huang 2020b <sup>(13)</sup>                         | Y  | Y  | Y  | Y  | N  | N  | N  | N  | Y  | Y   | Y   | Y   | Y   | Y   | 10          | 14               | 0.71  | Fair                         |
| Huang 2020c <sup>(14)</sup>                         | Y  | Y  | Y  | Y  | N  | N  | N  | N  | Y  | N   | Y   | Y   | Y   | Y   | 9           | 14               | 0.64  | Fair                         |
| Hundessa 2018 <sup>(15)</sup>                       | Y  | Y  | NA | NA | N  | N  | N  | N  | Y  | N   | Y   | Y   | NA  | N   | 5           | 11               | 0.45  | Low                          |
| Ji 2019 <sup>(16)</sup>                             | Y  | Y  | NR | Y  | N  | Y  | Y  | Y  | N  | Y   | N   | Y   | N   | Y   | 9           | 14               | 0.64  | Fair                         |
| Ji 2020b <sup>(17)</sup>                            | Y  | Y  | NR | Y  | N  | Y  | Y  | N  | Y  | y   | N   | Y   | Y   | Y   | 10          | 14               | 0.71  | Fair                         |
| Jia 2018 <sup>(18)</sup>                            | Y  | Y  | Y  | Y  | N  | n  | n  | N  | Y  | N   |     | NR  | Y   | Y   | 7           | 14               | 0.50  | Fair                         |
| Leng 2020 <sup>(19)</sup>                           | Y  | Y  | NA | Y  | N  | n  | n  | N  | Y  | N   | Y   | CD  | N   | Y   | 6           | 13               | 0.46  | Low                          |
| Li 2019a <sup>(20)</sup>                            | Y  | Y  | Y  | Y  | N  | n  | n  | Y  | Y  | Y   | Y   | Y   | Y   | Y   | 11          | 14               | 0.79  | High                         |
| Li 2020 <sup>(21)</sup>                             | Y  | Y  | NA | Y  | N  | N  | N  | N  | N  | N   | Y   | Y   | NA  | N   | 5           | 12               | 0.42  | Low                          |
| Liao 2019 <sup>(22)</sup>                           | Y  | Y  | NR | Y  | N  | N  | N  | N  | Y  | N   | Y   | NR  | Y   | Y   | 7           | 14               | 0.50  | Fair                         |
| Liao 2020 <sup>(23)</sup>                           | Y  | Y  | NR | y  | N  | n  | n  | N  | Y  | n   | Y   | Y   | NR  | n   | 6           | 14               | 0.43  | Low                          |
| Lin 2020 <sup>(24)</sup>                            | Y  | Y  | NA | Y  | N  | Y  | y  | N  | Y  | Y   | Y   | Y   | Y   | Y   | 11          | 13               | 0.85  | High                         |
| Liu 2016 <sup>(25)</sup>                            | Y  | Y  | Y  | Y  | N  | N  | N  | Y  | N  | N   | Y   | N   | Y   | Y   | 8           | 14               | 0.57  | Fair                         |
| Liu 2017 <sup>(26)</sup>                            | Y  | Y  | NR | Y  | N  | N  | N  | N  | N  | N   | N   | N   | Y   | Y   | 5           | 14               | 0.36  | Low                          |
| Liu 2019a <sup>(27)</sup>                           | Y  | Y  | Y  | N  | NA | NA | Y  | N  | Y  | Y   | Y   | Y   | Y   | Y   | 10          | 12               | 0.83  | High                         |
| Liu 2019b <sup>(28)</sup>                           | Y  | Y  | Y  | Y  | N  | N  | N  | N  | Y  | N   | Y   | Y   | Y   | Y   | 9           | 14               | 0.64  | Fair                         |
| Liu 2019c <sup>(29)</sup>                           | Y  | Y  | NR | Y  | N  | N  | N  | N  | Y  | N   | Y   | Y   | NR  | Y   | 7           | 14               | 0.50  | Fair                         |
| Liu 2020 <sup>(30)</sup>                            | Y  | Y  | NR | Y  | N  | N  | N  | N  | Y  | N   | Y   | Y   | NR  | Y   | 7           | 14               | 0.50  | Fair                         |
| Lu 2020 <sup>(31)</sup>                             | Y  | Y  | Y  | Y  | N  | N  | N  | N  | Y  | N   | N   | N   | Y   | Y   | 7           | 14               | 0.50  | Fair                         |
| Madaniyazi 2016 <sup>(32)</sup>                     | Y  | Y  | NA | Y  | N  | N  | N  | N  | Y  | N   | Y   | Y   | NA  | N   | 6           | 12               | 0.50  | Fair                         |
| Nie 2020 <sup>(33)</sup>                            | Y  | Y  | Y  | Y  | Y  | Y  | Y  | Y  | Y  | N   | N   | Y   | Y   | Y   | 12          | 14               | 0.86  | High                         |
| Peng 2020 <sup>(34)</sup>                           | Y  | Y  | Y  | Y  | NA | N  | N  | Y  | Y  | N   | Y   | Y   | Y   | Y   | 10          | 13               | 0.77  | High                         |
| Qiu 2019 <sup>(35)</sup>                            | Y  | Y  | y  | Y  | N  | N  | N  | N  | Y  | N   | Y   | Y   | Y   | Y   | 9           | 14               | 0.64  | Fair                         |
| Qu 2020 <sup>(36)</sup>                             | Y  | Y  | Y  | y  | N  | N  | N  | N  | Y  | N   | Y   | Y   | Y   | Y   | 9           | 14               | 0.64  | Fair                         |
| Sun 2020 <sup>(37)</sup>                            | Y  | Y  | NR | Y  | N  | N  | N  | Y  | Y  | y   | Y   | Y   | Y   | Y   | 10          | 14               | 0.71  | Fair                         |
| Takano 2002 <sup>(38)</sup>                         | Y  | Y  | NA | Y  | NA | N  | N  | N  | Y  | Y   | Y   | Y   | NA  | N   | 7           | 11               | 0.64  | Fair                         |
| Tang 2020 <sup>(39)</sup>                           | Y  | Y  | NR | Y  | N  | N  | N  | N  | Y  | N   | N   | Y   | NR  | Y   | 6           | 14               | 0.43  | Low                          |
| Wang 2016 <sup>(40)</sup>                           | Y  | Y  | NR | Y  | N  | N  | N  | Y  | Y  | N   | Y   | Y   | Y   | Y   | 9           | 14               | 0.64  | Fair                         |
| Wang L. 2019 <sup>(41)</sup>                        | Y  | Y  | Y  | Y  | NA | N  | N  | N  | Y  | N   | Y   | Y   | Y   | N   | 8           | 13               | 0.62  | Fair                         |
| Wang R. 2019a <sup>(42)</sup>                       | Y  | Y  | Y  | Y  | N  | N  | N  | N  | Y  | N   | N   | Y   | Y   | Y   | 8           | 14               | 0.57  | Fair                         |
| Wang R. 2019b <sup>(43)</sup>                       | Y  | Y  | Y  | Y  | N  | N  | N  | N  | Y  | N   | Y   | Y   | Y   | Y   | 10          | 14               | 0.71  | Fair                         |
| Wang R. 2020 <sup>(44)</sup>                        | Y  | Y  | Y  | Y  | N  | N  | N  | N  | Y  | N   | Y   | Y   | Y   | Y   | 9           | 14               | 0.64  | Fair                         |
| Wang Z. 2020 <sup>(45)</sup>                        | Y  | Y  | NR | Y  | N  | N  | N  | N  | N  | N   | Y   | N   | Y   | Y   | 6           | 14               | 0.43  | Low                          |
| Xiao 2020 <sup>(46)</sup>                           | Y  | Y  | Y  | Y  | N  | N  | N  | Y  | Y  | N   | Y   | NR  | Y   | Y   | 9           | 14               | 0.64  | Fair                         |
| Xie 2018 <sup>(47)</sup>                            | Y  | Y  | N  | Y  | N  | N  | N  | N  | Y  | N   | N   | Y   | Y   | Y   | 7           | 14               | 0.50  | Fair                         |
| Xie 2020 <sup>(48)</sup>                            | Y  | Y  | Y  | Y  | N  | Y  | N  | N  | Y  | N   | Y   | NR  | Y   | Y   | 9           | 14               | 0.64  | Fair                         |
| Xue 2019 <sup>(49)</sup>                            | Y  | Y  | NR | Y  | N  | Y  | Y  | N  | N  | Y   | N   | Y   | NR  | Y   | 8           | 14               | 0.57  | Fair                         |
| Yang 2019a <sup>(50)</sup>                          | Y  | Y  | Y  | Y  | N  | N  | N  | N  | N  | N   | Y   | NR  | Y   | Y   | 7           | 14               | 0.50  | Fair                         |
| Yang 2019b <sup>(51)</sup>                          | Y  | Y  | Y  | Y  | N  | N  | N  | Y  | N  | N   | Y   | NR  | N   | Y   | 7           | 14               | 0.50  | Fair                         |
| Yang 2019c <sup>(52)</sup>                          | Y  | Y  | Y  | Y  | N  | N  | N  | Y  | N  | N   | Y   | NR  | N   | Y   | 7           | 14               | 0.50  | Fair                         |
| Yang 2019d <sup>(53)</sup>                          | Y  | Y  | Y  | Y  | N  | Y  | N  | Y  | Y  | N   | Y   | NR  | Y   | Y   | 10          | 14               | 0.71  | Fair                         |
| Yang 2020a <sup>(54)</sup>                          | Y  | Y  | N  | Y  | N  | N  | N  | N  | N  | N   | Y   | N   | Y   | Y   | 6           | 14               | 0.43  | Low                          |
| Yang 2020b <sup>(55)</sup>                          | Y  | Y  | Y  | Y  | N  | N  | N  | N  | N  | N   | Y   | NR  | N   | Y   | 6           | 14               | 0.43  | Low                          |
| Yang 2020c <sup>(56)</sup>                          | Y  | Y  | Y  | Y  | N  | N  | N  | Y  | N  | N   | Y   | Y   | N   | Y   | 8           | 14               | 0.57  | Fair                         |
| Yang T. 2019 <sup>(57)</sup>                        | Y  | Y  | N  | Y  | N  | N  | N  | Y  | Y  | N   | Y   | Y   | NR  | Y   | 8           | 14               | 0.57  | Fair                         |
| Ying 2015 <sup>(58)</sup>                           | Y  | Y  | Y  | Y  | N  | N  | N  | N  | Y  | N   | Y   | Y   | Y   | Y   | 9           | 14               | 0.64  | Fair                         |

|                                   |   |   |    |   |    |   |   |   |   |   |    |    |    |   |    |    |      |      |
|-----------------------------------|---|---|----|---|----|---|---|---|---|---|----|----|----|---|----|----|------|------|
| Zeng 2020a <sup>(59)</sup>        | Y | Y | Y  | Y | N  | N | N | Y | Y | N | Y  | NR | Y  | Y | 9  | 14 | 0.64 | Fair |
| Zhang 2017 <sup>(60)</sup>        | Y | Y | Y  | Y | NA | N | N | N | Y | N | Y  | Y  | NA | Y | 8  | 12 | 0.67 | Fair |
| Zhang 2018 <sup>(61)</sup>        | Y | Y | NR | Y | N  | N | N | N | Y | N | Y  | Y  | NR | Y | 7  | 14 | 0.5  | Fair |
| Zhang 2019 <sup>(62)</sup>        | Y | Y | NR | Y | N  | N | N | N | N | N | N  | N  | NR | N | 3  | 14 | 0.21 | Low  |
| Zhao 2019 <sup>(63)</sup>         | Y | Y | NA | Y | NA | N | N | N | Y | N | N  | Y  | Y  | N | 6  | 12 | 0.50 | Fair |
| Zhou 2017 <sup>(64)</sup>         | Y | Y | NR | Y | N  | N | N | N | Y | N | NR | Y  | NR | N | 5  | 14 | 0.36 | Low  |
| Zhou 2020 <sup>(65)</sup>         | Y | Y | NR | Y | N  | N | N | N | Y | N | N  | Y  | NR | Y | 6  | 14 | 0.43 | Low  |
| Zhu 2019a-study 1 <sup>(66)</sup> | Y | Y | NR | Y | N  | N | N | N | Y | Y | Y  | Y  | Y  | Y | 9  | 14 | 0.64 | Fair |
| Zhu 2019a-study 2 <sup>(66)</sup> | Y | Y | NR | Y | N  | Y | Y | N | Y | Y | Y  | Y  | N  | Y | 10 | 14 | 0.71 | Fair |
| Zhu 2019b-study 1 <sup>(67)</sup> | Y | Y | NR | Y | N  | N | N | Y | Y | N | Y  | Y  | N  | Y | 8  | 14 | 0.57 | Fair |
| Zhu 2019b-study 2 <sup>(67)</sup> | Y | Y | NR | Y | N  | Y | Y | Y | Y | N | Y  | Y  | N  | Y | 10 | 14 | 0.71 | Fair |
| Zhu 2020a <sup>(68)</sup>         | Y | Y | NR | Y | N  | Y | Y | Y | Y | N | Y  | Y  | N  | Y | 10 | 14 | 0.71 | Fair |
| Zhu 2020b <sup>(69)</sup>         | Y | Y | NR | Y | N  | Y | Y | Y | Y | Y | Y  | Y  | N  | Y | 11 | 14 | 0.79 | High |
| Zhu 2020c <sup>(70)</sup>         | Y | Y | NR | Y | N  | Y | Y | Y | Y | Y | Y  | Y  | N  | Y | 11 | 14 | 0.79 | High |

## b. Controlled intervention studies

| Study (Author year)                            | Q1 | Q2 | Q3 | Q4 | Q5 | Q6 | Q7 | Q8 | Q9 | Q10 | Q11 | Q12 | Q13 | Q14 | Total score | Total applicable | Ratio | Ranking (low, fair, or high) |
|------------------------------------------------|----|----|----|----|----|----|----|----|----|-----|-----|-----|-----|-----|-------------|------------------|-------|------------------------------|
| Elsadek 2019 <sup>(71)</sup>                   | Y  | NR | NR | N  | NR | NA | Y  | Y  | Y  | N   | Y   | NR  | Y   | Y   | 7           | 13               | 0.54  | Fair                         |
| Elsadek 2019 <sup>(72)</sup>                   | Y  | NR | NR | N  | N  | NA | Y  | Y  | Y  | Y   | Y   | NR  | Y   | Y   | 8           | 13               | 0.62  | Fair                         |
| Hassan 2018 <sup>(73)</sup>                    | Y  | NR | NR | N  | N  | NA | Y  | Y  | Y  | Y   | Y   | NR  | Y   | Y   | 8           | 13               | 0.62  | Fair                         |
| Jia 2016 <sup>(74)</sup>                       | Y  | NR | NR | NR | NR | Y  | Y  | Y  | Y  | Y   | Y   | N   | Y   | N   | 8           | 14               | 0.57  | Fair                         |
| Lyu 2019a <sup>(75)</sup>                      | Y  | NR | NR | NR | NR | Y  | Y  | Y  | Y  | Y   | Y   | NR  | Y   | Y   | 9           | 14               | 0.64  | Fair                         |
| Lyu 2019b <sup>(76)</sup>                      | Y  | NR | NR | NR | NR | Y  | Y  | Y  | Y  | Y   | Y   | NR  | Y   | Y   | 9           | 14               | 0.64  | Fair                         |
| Mao 2012 <sup>(77)</sup>                       | Y  | NR | NR | N  | NR | Y  | Y  | Y  | Y  | Y   | Y   | N   | Y   | Y   | 9           | 14               | 0.64  | Fair                         |
| Mao 2012 <sup>(78)</sup>                       | Y  | NR | NR | N  | NR | Y  | Y  | Y  | Y  | Y   | Y   | N   | Y   | Y   | 9           | 14               | 0.64  | Fair                         |
| Mao 2017 & Wu 2017-study 1 <sup>(79, 80)</sup> | Y  | NR | NR | N  | NR | Y  | Y  | Y  | Y  | Y   | Y   | N   | Y   | N   | 8           | 14               | 0.57  | Fair                         |
| Mao 2017 & Wu 2017-study 2 <sup>(79, 80)</sup> | Y  | NR | NR | N  | NR | N  | Y  | Y  | Y  | Y   | Y   | N   | Y   | Y   | 8           | 14               | 0.57  | Fair                         |
| Zeng 2020b <sup>(81)</sup>                     | Y  | NR | NR | NR | NR | Y  | Y  | Y  | Y  | Y   | Y   | NR  | Y   | Y   | 9           | 14               | 0.64  | Fair                         |

## c. Before-after studies

| Study (Author year)       | Q1 | Q2 | Q3 | Q4 | Q5 | Q6 | Q7 | Q8 | Q9 | Q10 | Q11 | Q12 | Total score | Total applicable | Ratio | Ranking (low, fair, or high) |
|---------------------------|----|----|----|----|----|----|----|----|----|-----|-----|-----|-------------|------------------|-------|------------------------------|
| Li 2019b <sup>(82)</sup>  | Y  | Y  | N  | Y  | NR | Y  | N  | N  | N  | Y   | N   | NA  | 6           | 11               | 0.55  | Fair                         |
| Zhou 2019 <sup>(83)</sup> | Y  | Y  | Y  | Y  | NR | Y  | Y  | N  | Y  | Y   | N   | NA  | 8           | 11               | 0.73  | Fair                         |

Table S3. Study summary and characteristics.

| Mental health outcomes     |                                                  |                                                         |                      |                                                             |                      |                                                                                                        |                                          |                                |                                |                                                                                                                                          |                                                                                                                                                                                                                                                                                                                                                                                                                                                                                                                                                                                                                                                                                                                                                                                                                                                                                                                                                                                                                                                                                                                                                                                                                                                                                                                                                                                                                                                                                                                                                                                                                                                                                                                                                                                                                                                                                                                                                                                                                                                                                                                                                                                                                                                                                                                                                                                                                                                                                                                                                                                                                                                                                                                                                                                                                                                                                                                                                                                                                                                                                                                                                                                                                                                                                                                                                                                                                                                                                                                                                                                                                                                                                                                                                                                                                                                                                                                                                                                                                                                                                                                                                                                                                                                                                                                                                                                                                                                                                                                                                                                                                                                                                                                                                                                                                                                                                                                                                                                                                                                                                                                                                                                                                                                                                                                                                                                                                                                                                                                                                                                                                                                                                                                                                                                                                                                                                                                                                                                                                                                                                                                                                                                                                                                                                                                                                                                                                                                                                                                                                                                                                                                                                                                                                                                                                                                                                                                                                                                                                                                                                                                                                                                                                                                                                                                                                                                                                                                                                                                                                                                                                                                                                                                                                                                                                                                                                                                                                                                                                                                                                                                                                                                                                                                                                                                                                                                                                                                                                                                                                                                                                                                                                                                                                                                                                                                                                                                                                                                                                                                                                                                                                                                                                                                                                                                                                            |
|----------------------------|--------------------------------------------------|---------------------------------------------------------|----------------------|-------------------------------------------------------------|----------------------|--------------------------------------------------------------------------------------------------------|------------------------------------------|--------------------------------|--------------------------------|------------------------------------------------------------------------------------------------------------------------------------------|------------------------------------------------------------------------------------------------------------------------------------------------------------------------------------------------------------------------------------------------------------------------------------------------------------------------------------------------------------------------------------------------------------------------------------------------------------------------------------------------------------------------------------------------------------------------------------------------------------------------------------------------------------------------------------------------------------------------------------------------------------------------------------------------------------------------------------------------------------------------------------------------------------------------------------------------------------------------------------------------------------------------------------------------------------------------------------------------------------------------------------------------------------------------------------------------------------------------------------------------------------------------------------------------------------------------------------------------------------------------------------------------------------------------------------------------------------------------------------------------------------------------------------------------------------------------------------------------------------------------------------------------------------------------------------------------------------------------------------------------------------------------------------------------------------------------------------------------------------------------------------------------------------------------------------------------------------------------------------------------------------------------------------------------------------------------------------------------------------------------------------------------------------------------------------------------------------------------------------------------------------------------------------------------------------------------------------------------------------------------------------------------------------------------------------------------------------------------------------------------------------------------------------------------------------------------------------------------------------------------------------------------------------------------------------------------------------------------------------------------------------------------------------------------------------------------------------------------------------------------------------------------------------------------------------------------------------------------------------------------------------------------------------------------------------------------------------------------------------------------------------------------------------------------------------------------------------------------------------------------------------------------------------------------------------------------------------------------------------------------------------------------------------------------------------------------------------------------------------------------------------------------------------------------------------------------------------------------------------------------------------------------------------------------------------------------------------------------------------------------------------------------------------------------------------------------------------------------------------------------------------------------------------------------------------------------------------------------------------------------------------------------------------------------------------------------------------------------------------------------------------------------------------------------------------------------------------------------------------------------------------------------------------------------------------------------------------------------------------------------------------------------------------------------------------------------------------------------------------------------------------------------------------------------------------------------------------------------------------------------------------------------------------------------------------------------------------------------------------------------------------------------------------------------------------------------------------------------------------------------------------------------------------------------------------------------------------------------------------------------------------------------------------------------------------------------------------------------------------------------------------------------------------------------------------------------------------------------------------------------------------------------------------------------------------------------------------------------------------------------------------------------------------------------------------------------------------------------------------------------------------------------------------------------------------------------------------------------------------------------------------------------------------------------------------------------------------------------------------------------------------------------------------------------------------------------------------------------------------------------------------------------------------------------------------------------------------------------------------------------------------------------------------------------------------------------------------------------------------------------------------------------------------------------------------------------------------------------------------------------------------------------------------------------------------------------------------------------------------------------------------------------------------------------------------------------------------------------------------------------------------------------------------------------------------------------------------------------------------------------------------------------------------------------------------------------------------------------------------------------------------------------------------------------------------------------------------------------------------------------------------------------------------------------------------------------------------------------------------------------------------------------------------------------------------------------------------------------------------------------------------------------------------------------------------------------------------------------------------------------------------------------------------------------------------------------------------------------------------------------------------------------------------------------------------------------------------------------------------------------------------------------------------------------------------------------------------------------------------------------------------------------------------------------------------------------------------------------------------------------------------------------------------------------------------------------------------------------------------------------------------------------------------------------------------------------------------------------------------------------------------------------------------------------------------------------------------------------------------------------------------------------------------------------------------------------------------------------------------------------------------------------------------------------------------------------------------------------------------------------------------------------------------------------------------------------------------------------------------------------------------------------------------------------------------------------------------------------------------------------------------------------------------------------------------------------------------------------------------------------------------------------------------------------------------------------------------------------------------------------------------------------------------------------------------------------------------------------------------------------------------------------------------------------------------------------------------------------------------------------------------------------------------------------------------------------------------------------------------------------------------------------------------------------------------------------------------------------------------|
| Author<br>Year<br>province | Study<br>design<br>Sample<br>size<br>(attrition) | Population<br>(health<br>condition,<br>%female,<br>age) | Environment<br>focus | Exposure/intervention<br>measures and follow<br>up duration | Outcomes<br>measured | Outcome<br>measurement<br>  time points<br>measured                                                    | Results<br>* p<0.05                      | Summary of findings            |                                | Mediation or effect<br>modification                                                                                                      |                                                                                                                                                                                                                                                                                                                                                                                                                                                                                                                                                                                                                                                                                                                                                                                                                                                                                                                                                                                                                                                                                                                                                                                                                                                                                                                                                                                                                                                                                                                                                                                                                                                                                                                                                                                                                                                                                                                                                                                                                                                                                                                                                                                                                                                                                                                                                                                                                                                                                                                                                                                                                                                                                                                                                                                                                                                                                                                                                                                                                                                                                                                                                                                                                                                                                                                                                                                                                                                                                                                                                                                                                                                                                                                                                                                                                                                                                                                                                                                                                                                                                                                                                                                                                                                                                                                                                                                                                                                                                                                                                                                                                                                                                                                                                                                                                                                                                                                                                                                                                                                                                                                                                                                                                                                                                                                                                                                                                                                                                                                                                                                                                                                                                                                                                                                                                                                                                                                                                                                                                                                                                                                                                                                                                                                                                                                                                                                                                                                                                                                                                                                                                                                                                                                                                                                                                                                                                                                                                                                                                                                                                                                                                                                                                                                                                                                                                                                                                                                                                                                                                                                                                                                                                                                                                                                                                                                                                                                                                                                                                                                                                                                                                                                                                                                                                                                                                                                                                                                                                                                                                                                                                                                                                                                                                                                                                                                                                                                                                                                                                                                                                                                                                                                                                                                                                                                                                            |
|                            | Chang 2019<br>(2)<br>All                         |                                                         | CSS<br>663(NR)       | Urban middle-<br>aged<br>citizens<br>F:50%<br>40- 65y       | Park visit           | Subjective:<br>frequency of<br>leisure activity in<br>nature (visiting<br>park or outdoor<br>exercise) | Depression<br>(absence of<br>depression) | Subjectiv<br>e: SWBS,<br>CES-D | Absence of<br>depression: (+)* | Subjective<br>frequency of green<br>space use was<br>positively and<br>significantly<br>associated with the<br>absence of<br>depression. | Leisure satisfaction<br>partially modified the<br>association.<br><br><br><br><br><br><br><br><br><br><br><br><br><br><br><br><br><br><br><br><br><br><br><br><br><br><br><br><br><br><br><br><br><br><br><br><br><br><br><br><br><br><br><br><br><br><br><br><br><br><br><br><br><br><br><br><br><br><br><br><br><br><br><br><br><br><br><br><br><br><br><br><br><br><br><br><br><br><br><br><br><br><br><br><br><br><br><br><br><br><br><br><br><br><br><br><br><br><br><br><br><br><br><br><br><br><br><br><br><br><br><br><br><br><br><br><br><br><br><br><br><br><br><br><br><br><br><br><br><br><br><br><br><br><br><br><br><br><br><br><br><br><br><br><br><br><br><br><br><br><br><br><br><br><br><br><br><br><br><br><br><br><br><br><br><br><br><br><br><br><br><br><br><br><br><br><br><br><br><br><br><br><br><br><br><br><br><br><br><br><br><br><br><br><br><br><br><br><br><br><br><br><br><br><br><br><br><br><br><br><br><br><br><br><br><br><br><br><br><br><br><br><br><br><br><br><br><br><br><br><br><br><br><br><br><br><br><br><br><br><br><br><br><br><br><br><br><br><br><br><br><br><br><br><br><br><br><br><br><br><br><br><br><br><br><br><br><br><br><br><br><br><br><br><br><br><br><br><br><br><br><br><br><br><br><br><br><br><br><br><br><br><br><br><br><br><br><br><br><br><br><br><br><br><br><br><br><br><br><br><br><br><br><br><br><br><br><br><br><br><br><br><br><br><br><br><br><br><br><br><br><br><br><br><br><br><br><br><br><br><br><br><br><br><br><br><br><br><br><br><br><br><br><br><br><br><br><br><br><br><br><br><br><br><br><br><br><br><br><br><br><br><br><br><br><br><br><br><br><br><br><br><br><br><br><br><br><br><br><br><br><br><br><br><br><br><br><br><br><br><br><br><br><br><br><br><br><br><br><br><br><br><br><br><br><br><br><br><br><br><br><br><br><br><br><br><br><br><br><br><br><br><br><br><br><br><br><br><br><br><br><br><br><br><br><br><br><br><br><br><br><br><br><br><br><br><br><br><br><br><br><br><br><br><br><br><br><br><br><br><br><br><br><br><br><br><br><br><br><br><br><br><br><br><br><br><br><br><br><br><br><br><br><br><br><br><br><br><br><br><br><br><br><br><br><br><br><br><br><br><br><br><br><br><br><br><br><br><br><br><br><br><br><br><br><br><br><br><br><br><br><br><br><br><br><br><br><br><br><br><br><br><br><br><br><br><br><br><br><br><br><br><br><br><br><br><br><br><br><br><br><br><br><br><br><br><br><br><br><br><br><br><br><br><br><br><br><br><br><br><br><br><br><br><br><br><br><br><br><br><br><br><br><br><br><br><br><br><br><br><br><br><br><br><br><br><br><br><br><br><br><br><br><br><br><br><br><br><br><br><br><br><br><br><br><br><br><br><br><br><br><br><br><br><br><br><br><br><br><br><br><br><br><br><br><br><br><br><br><br><br><br><br><br><br><br><br><br><br><br><br><br><br><br><br><br><br><br><br><br><br><br><br><br><br><br><br><br><br><br><br><br><br><br><br><br><br><br><br><br><br><br><br><br><br><br><br><br><br><br><br><br><br><br><br><br><br><br><br><br><br><br><br><br><br><br><br><br><br><br><br><br><br><br><br><br><br><br><br><br><br><br><br><br><br><br><br><br><br><br><br><br><br><br><br><br><br><br><br><br><br><br><br><br><br><br><br><br><br><br><br><br><br><br><br><br><br><br><br><br><br><br><br><br><br><br><br><br><br><br><br><br><br><br><br><br><br><br><br><br><br><br><br><br><br><br><br><br><br><br><br><br><br><br><br><br><br><br><br><br><br><br><br><br><br><br><br><br><br><br><br><br><br><br><br><br><br><br><br><br><br><br><br><br><br><br><br><br><br><br><br><br><br><br><br><br><br><br><br><br><br><br><br><br><br><br><br><br><br><br><br><br><br><br><br><br><br><br><br><br><br><br><br><br><br><br><br><br><br><br><br><br><br><br><br><br><br><br><br><br><br><br><br><br><br><br><br><br><br><br><br><br><br><br><br><br><br><br><br><br><br><br><br><br><br><br><br><br><br><br><br><br><br><br><br><br><br><br><br><br><br><br><br><br><br><br><br><br><br><br><br><br><br><br><br><br><br><br><br><br><br><br><br><br><br><br><br><br><br><br><br><br><br><br><br><br><br><br><br><br><br><br><br><br><br><br><br><br><br><br><br><br><br><br><br><br><br><br><br><br><br><br><br><br><br><br><br><br><br><br><br><br><br><br><br><br><br><br><br><br><br><br><br><br><br><br><br><br><br><br><br><br><br><br><br><br><br><br><br><br><br><br><br><br><br><br><br><br><br><br><br><br><br><br><br><br><br><br><br><br><br><br><br><br><br><br><br><br><br><br><br><br><br><br><br><br><br><br><br><br><br><br><br><br><br><br><br><br><br><br><br><br><br><br><br><br><br><br><br><br><br><br><br><br><br><br><br><br><br><br><br><br><br><br><br><br><br><br><br><br><br><br><br><br><br><br><br><br><br><br><br><br><br><br><br><br><br><br><br><br><br><br><br><br><br><br><br><br><br><br><br><br><br><br><br><br><br><br><br><br><br><br><br><br><br><br><br><br><br><br><br><br><br><br><br><br><br><br><br><br><br><br><br><br><br><br><br><br><br><br><br><br><br><br><br><br><br><br><br><br><br><br><br><br><br><br><br><br><br><br><br><br><br><br><br><br><br><br><br><br><br><br><br><br><br><br><br><br><br><br><br><br><br><br><br><br><br><br><br><br><br><br><br><br><br><br><br><br><br><br><br><br><br><br><br><br><br><br><br><br><br><br><br><br><br><br><br><br><br><br><br><br><br><br><br><br><br><br><br><br><br><br><br><br><br><br><br><br><br><br><br><br><br><br><br><br><br><br><br><br><br><br><br><br><br><br><br><br><br><br><br><br><br><br><br><br><br><br><br><br><br><br><br><br><br><br><br><br><br><br><br><br><br><br><br><br><br><br><br><br><br><br><br><br><br><br><br><br><br><br><br><br><br><br><br><br><br><br><br><br><br><br><br><br><br><br><br><br><br><br><br><br><br><br><br><br><br><br><br><br><br><br><br><br><br><br><br><br><br><br><br><br><br><br><br><br><br><br><br><br><br><br><br><br><br><br><br><br><br><br><br><br><br><br><br><br><br><br><br><br><br><br><br><br><br><br><br><br><br><br><br><br><br><br><br><br><br><br><br><br><br><br><br><br><br><br><br><br><br><br><br><br><br><br><br><br><br><br><br><br><br><br><br><br><br><br><br><br><br><br><br><br><br><br><br><br><br><br><br><br><br><br><br><br><br><br><br><br><br><br><br><br><br><br><br><br><br><br><br><br><br><br><br><br><br><br><br><br><br><br><br><br><br><br><br><br><br><br><br><br><br><br><br><br><br><br><br><br><br><br><br><br><br><br><br><br><br><br><br><br><br><br><br><br><br><br><br><br><br><br><br><br><br><br><br><br><br><br><br><br><br><br><br><br><br><br><br><br><br><br><br><br><br><br><br><br><br><br><br><br><br><br><br><br><br><br><br><br><br><br><br><br><br><br><br><br><br><br><br><br><br><br><br><br><br><br><br><br><br><br><br><br><br><br><br><br><br><br><br><br><br><br><br><br><br><br><br><br><br><br><br><br><br><br><br><br><br><br><br><br><br><br><br><br><br><br><br><br><br><br><br><br><br><br><br><br><br><br><br><br><br><br><br><br><br><br><br><br><br><br><br><br><br><br><br><br><br><br><br><br><br><br><br><br><br><br><br><br><br><br><br><br><br><br><br><br><br><br><br><br><br><br><br><br><br><br><br><br><br><br><br><br><br><br><br><br><br><br><br><br><br><br><br><br><br><br><br><br><br><br><br><br><br><br><br><br><br><br><br><br><br><br><br><br><br><br><br><br><br><br><br><br><br><br><br><br><br><br><br><br><br><br><br><br><br><br><br><br><br><br><br><br><br><br><br><br><br><br><br><br><br><br><br><br><br><br><br><br><br><br><br><br><br><br><br><br><br><br><br><br><br><br><br><br><br><br><br><br><br><br><br><br><br><br><br><br><br><br><br><br><br><br><br><br><br><br><br><br><br><br><br><br><br><br><br><br><br><br><br><br><br><br><br><br><br><br><br><br><br><br><br><br><br><br><br><br><br><br><br><br><br><br><br><br><br><br><br><br><br><br><br><br><br><br><br><br><br><br><br><br><br><br><br><br><br><br><br><br><br><br><br><br><br><br><br><br><br><br><br><br><br><br><br><br><br><br><br><br><br><br><br><br><br><br><br><br><br><br><br><br><br><br><br><br><br><br><br><br><br><br><br><br><br><br><br><br><br><br><br><br><br><br><br><br><br><br><br><br><br><br><br><br><br><br><br><br><br><br><br><br><br><br><br><br><br><br><br><br><br><br><br><br><br><br><br><br><br><br><br><br><br><br><br><br><br><br><br><br><br><br><br><br><br><br><br><br><br><br><br><br><br><br><br><br><br><br><br><br><br><br><br><br><br><br><br><br><br><br><br><br><br><br><br><br><br><br><br><br><br><br><br><br><br><br><br><br><br><br><br><br><br><br><br><br><br><br><br><br><br><br><br><br><br><br><br><br><br><br><br><br><br><br><br><br><br><br><br><br><br><br><br><br><br><br><br><br><br><br><br><br><br><br><br><br><br><br><br><br><br><br><br><br><br><br><br><br><br><br><br><br><br><br><br><br><br><br><br><br><br><br><br><br><br><br><br><br><br><br><br><br><br><br><br><br><br><br><br><br><br><br><br><br><br><br><br><br><br><br><br><br><br><br><br><br><br><br><br><br><br><br><br><br><br><br><br><br><br><br><br><br><br><br><br><br><br><br><br><br><br><br><br><br><br><br><br><br><br><br><br><br><br><br><br><br><br><br><br><br><br><br><br><br><br><br><br><br><br><br><br><br><br><br><br><br><br><br><br><br><br><br><br><br><br><br><br><br><br><br><br><br><br><br><br><br><br><br><br><br><br><br><br><br><br><br><br><br><br><br><br><br><br> |

|                                  |                   |                                                                                             |                                        |                                                                                          |                                                                                                                                                                                                |                                                                                                                                                                  |                                                                                                                                                                                                                             |                                                                                                                                                                                                                              |                                                                                                                                           |
|----------------------------------|-------------------|---------------------------------------------------------------------------------------------|----------------------------------------|------------------------------------------------------------------------------------------|------------------------------------------------------------------------------------------------------------------------------------------------------------------------------------------------|------------------------------------------------------------------------------------------------------------------------------------------------------------------|-----------------------------------------------------------------------------------------------------------------------------------------------------------------------------------------------------------------------------|------------------------------------------------------------------------------------------------------------------------------------------------------------------------------------------------------------------------------|-------------------------------------------------------------------------------------------------------------------------------------------|
| Elsadek 2019<br>(71)<br>Shanghai | RCT, CO<br>25(0)  | Healthy university<br>students<br>F:100%<br>Mean 23 ± 1.5 (SE) y                            | IG: green façade<br>CG: building-wall  | Wall view                                                                                | Alpha relative power,<br>HRV, skin conductance<br><br>Feelings (relaxation), mood<br>and its subcomponents<br>(tension-anxiety,<br>depression, anger-hostility,<br>fatigue, confusion, vigour) | Objective:<br>EEG, multi-<br>sensor device<br><br>Subjective: 5-<br>point rating<br>scale, PoMS<br>  after the test                                              | Alpha relative power, high<br>frequency power, feelings<br>(relaxation), mood<br>(positive scales): ↑*;<br>mood (negative subscale),<br>low frequency/high<br>frequency power ratio,<br>skin conductance:<br>↓*(favourable) | Viewing a green façade<br>significantly improved<br>emotion control (alpha<br>relative power),<br>parasympathetic activity<br>(high frequency power),<br>HRV, skin conductance,<br>relaxation, and mood.                     | Not measured                                                                                                                              |
| Elsadek 2019<br>(72)<br>Shanghai | RCT, CO<br>364(0) | Healthy university<br>students and visitors<br>F: 45%<br>Mean 23 ± 4.6 y                    | IG: roadside trees<br>CG: urban road   | A 15-minute walk at 4<br>roadsides with various<br>levels of trees, 5<br>minutes washout | Mood subcomponents<br>(tension-anxiety,<br>depression, anger-hostility,<br>fatigue, confusion, vigour)                                                                                         | Subjective:<br>PoMs<br>subscales,<br>STAI, ROS,<br>SVS  before<br>and after the<br>test                                                                          | <b>Follow up</b><br>PoMs negative subscales,<br>anxiety: ↓*<br>Poms positive subscales,<br>restoration, vitality: ↑*                                                                                                        | Walking on the roadside<br>with trees significantly<br>decreased mood<br>disturbance, anxiety. It<br>improved the positive<br>subscale of the mood,<br>restoration and vitality<br>compared to walking on<br>the urban road. | Thermal comfort<br>and sky view factors<br>were strongly (rs><br>0.79) correlated<br>(inverse) with mood<br>disorders, STAI,<br>ROS, SVS. |
| Hassan 2018<br>(73)<br>Sichuan   | RCT, CO<br>60(0)  | Healthy university<br>student<br>F: 50%<br>19 and 24 y,<br>mean 19.6 ± 1.4 y                | IG: Forest<br>CG: Urban<br>environment | A 15-minute walk in<br>a bamboo forest and a<br>city area                                | EEG (high alpha and high<br>beta relaxation), relaxation,<br>attention                                                                                                                         | Objective:<br>EEG<br>Subjective:<br>STAI-<br>relaxation and<br>SATI-<br>attention SDM<br>(comfortable,<br>relaxed,<br>natural)<br>  before and<br>after the test | <b>Follow up</b><br>High alpha, high beta<br>STAI relaxation, STAI<br>attention, SDM: ↑*                                                                                                                                    | Walking in a forest<br>significantly increased<br>relaxation, attention and<br>comfort compared to<br>walking in the urban<br>environment.                                                                                   | Not measured                                                                                                                              |
| Helbich 2019<br>(10)<br>Beijing  | CSS<br>1, 250(60) | Older population<br>living in the area for<br>+10y<br>F: 60%<br>60+ y, mean 70.7 ± 7.0<br>y | Residential street<br>view green space | Images via Tencent<br>Map at the<br>neighbourhood level<br>(~0.8 km buffer)              | Depression                                                                                                                                                                                     | Subjective:<br>GDS-15                                                                                                                                            | 1st QR=reference<br>2nd QR (-)*<br>3rd QR: (-)*<br>4th QR: (-)*                                                                                                                                                             | Street view green space<br>was negatively and<br>significantly associated<br>with depression. The<br>association was stronger<br>in the third quartile of<br>green space.                                                    | Not measured                                                                                                                              |

|                                      |                                                   |                                                                                                                               |            |                                                                                                                      |                                                                                               |                                               |                                                          |                                                                                                                                                                                                                                        |              |
|--------------------------------------|---------------------------------------------------|-------------------------------------------------------------------------------------------------------------------------------|------------|----------------------------------------------------------------------------------------------------------------------|-----------------------------------------------------------------------------------------------|-----------------------------------------------|----------------------------------------------------------|----------------------------------------------------------------------------------------------------------------------------------------------------------------------------------------------------------------------------------------|--------------|
| Jia 2016 <sup>(74)</sup><br>Zhejiang | RCT, P,2-arm (1IG, 1CG)<br>20, n=10 at each group | COPD patients without the acute exacerbation F: NR<br>NR y                                                                    | Forest     | Walking in the site for 1.5h twice a day with a 20-min rest during the walk                                          | Mood subcomponents (tension-anxiety, depression, anger-hostility, fatigue, confusion, vigour) | Subjective: PoMs subscales   before and after | null                                                     | Walking in a forest did not change the mood in COPD patients compared to walking in the urban environment.<br>Visiting the park significantly enhanced all subcomponents of affective state compared to baseline for all participants. | Not measured |
| Li 2019b <sup>(82)</sup>             | BAS<br>257(57)                                    | Older population visiting a park for recreational purposes with no difficulty in walking<br>F: 42%<br>60+ y, mean 69.5 ±7.5 y | Park visit | Park visit for recreational purposes measured by GPS and device attached to participants before entering to the park | Affective states (stress, depression, relaxation and contention)                              | Subjective: VAS   before and after the visit  | Relaxation and contention: ↑*;<br>Stress, depression: ↓* | Participants who actively lingered in the vegetated part of the park or walked paths showed a better restoration effect than participants who were passively involved and spent less duration of park visit.                           | Not measured |

|                                     |                |                                           |                                                                                               |                                                                                   |                                                                                                                       |                                      |                                                                                                                                                                                                                                                                                        |                                                                                                                                                          |                                                   |
|-------------------------------------|----------------|-------------------------------------------|-----------------------------------------------------------------------------------------------|-----------------------------------------------------------------------------------|-----------------------------------------------------------------------------------------------------------------------|--------------------------------------|----------------------------------------------------------------------------------------------------------------------------------------------------------------------------------------------------------------------------------------------------------------------------------------|----------------------------------------------------------------------------------------------------------------------------------------------------------|---------------------------------------------------|
| Liao 2020 <sup>(23)</sup><br>Hubei  | CSS<br>6,039   | Children<br>F: 48%<br>5–6 y               | Residential green space, Kindergarten Greenspace, residence–kindergarten-weighted green space | Mean NDVIs within 0.1 km radius around the residential, kindergarten or both area | Behavioural development and its subcomponents (such as social withdrawal, anxiety and depression, Immature behaviour) | Subjective: CBCL total and subscales | Residence-kindergarten-weighted NDVI: total problem development score, anxiety and depression, aggressive behaviour, social problems, somatic complaints, obsessive behaviour, split behaviour, cruel behaviour: (-)*<br><br>Kindergarten NDVI: all above and immature behaviour: (-)* | Kindergarten NDVI and residence-kindergarten-weighted NDVI were negatively and significantly associated with behaviour problems and their subcomponents. | Associations were stronger in boys than in girls. |
|                                     |                |                                           |                                                                                               |                                                                                   |                                                                                                                       |                                      | Residential NDVI: split behaviour, cruel behaviour: (-)*<br><br>Social withdrawal, immature behaviour, delinquent behaviour: null                                                                                                                                                      |                                                                                                                                                          |                                                   |
| Liu 2016 <sup>(25)</sup><br>Jiangsu | CSS<br>775(12) | General population<br>F: 51%<br>Any age   | Proximity to green space                                                                      | Subjective: categorical                                                           | Well-being                                                                                                            | Subjective: WHO-5, EQLS              | null                                                                                                                                                                                                                                                                                   | Subjective proximity to green space was not associated with well-being.                                                                                  | Not measured                                      |
| Liu 2017 <sup>(26)</sup><br>Beijing | CSS<br>50(0)   | General population<br>F: 51.5%<br>10–60 y | Park visit                                                                                    | Subjective: time spent at the last visit to the park                              | Mood, relaxation                                                                                                      | Subjective: rating scale             | Mood, relaxation: null                                                                                                                                                                                                                                                                 | The time spent in the last visit to the park was not associated with any change in mood and relaxation after the visit.                                  | Not measured                                      |

|                                                                          |                    |                                                                                             |                                                                       |                                                                                                 |               |                       |                                                                     |                                                                                                                              |                                                                                                                                                                                                                                                                                                                                                                                                                                                                                                                                                                                                                                                                                                        |
|--------------------------------------------------------------------------|--------------------|---------------------------------------------------------------------------------------------|-----------------------------------------------------------------------|-------------------------------------------------------------------------------------------------|---------------|-----------------------|---------------------------------------------------------------------|------------------------------------------------------------------------------------------------------------------------------|--------------------------------------------------------------------------------------------------------------------------------------------------------------------------------------------------------------------------------------------------------------------------------------------------------------------------------------------------------------------------------------------------------------------------------------------------------------------------------------------------------------------------------------------------------------------------------------------------------------------------------------------------------------------------------------------------------|
| Liu 2019b <sup>(28)</sup><br>and Wang<br>R. 2019b <sup>(43)</sup><br>All | CSS<br>21, 06(553) | General population<br>F: 53%<br>15–64 y and 64+ y<br>who are at work,<br>mean 44.8 ± 14.6 y | Residential green<br>space coverage                                   | % green space<br>coverage within the<br>neighbourhood by<br>digital map                         | Depression    | Subjective:<br>CES-D  | (-)*<br>After adding mediators:<br>null                             | Residential green space<br>was negatively and<br>significantly associated<br>with depressive<br>symptoms.                    | Stress, physical<br>activity, social<br>cohesion completely<br>mediated the<br>association.<br>The relationship was<br>strongest at the<br>higher level of<br>urbanisation, and<br>higher social capital<br>(except for security<br>components) and<br>weaker for higher<br>household income.<br>Partial mediation<br>(16.7% of the total<br>effect) was found by<br>walking behaviour,<br>satisfaction with<br>greenness, and social<br>cohesion (ps < 0.01).<br>Stress, perceived<br>pollution had no<br>mediation effect.<br>Social cohesion<br>elements of the<br>neighbourhood<br>attachment,<br>community<br>participation<br>mediated the<br>association but not<br>neighbourly<br>interaction. |
| Liu 2019c <sup>(29)</sup><br>Guangdong                                   | CSS<br>1, 029(NR)  | General population<br>F: 50%<br>Mean 41.2 ± 13.6 y                                          | Residential green<br>space                                            | Mean NDVI within a 1<br>km radius around the<br>centroid of the<br>residential<br>neighbourhood | Well-being    | Subjective:<br>WHO-5  | Direct effect: (+)*<br>Indirect effect : (+)*<br>Total effect: (+)* | Residential green space<br>has positively and<br>significantly associated<br>with well-being measured<br>by WHO-5.           |                                                                                                                                                                                                                                                                                                                                                                                                                                                                                                                                                                                                                                                                                                        |
| Liu 2020 <sup>(30)</sup>                                                 | CSS<br>1, 150(NR)  | General population<br>F: 48<br>Mean 39.6 ± 11.1 y                                           | Residential green<br>space coverage and<br>street view green<br>space | Green space coverage<br>within the 1.5 km<br>radius around the<br>neighbourhood                 | Mental health | Subjective:<br>GHQ-12 | Green space: (-)*<br>Street view green space:<br>(-)*               | Residential green space<br>negatively and<br>significantly has<br>associated with mental<br>disorders measured by<br>GHQ-12. |                                                                                                                                                                                                                                                                                                                                                                                                                                                                                                                                                                                                                                                                                                        |



| Study                                                              | Study design                                               | Participants                                                                        | Intervention                                                                                       | Comparison                                                                         | Outcomes                                                                                              | Subjective: PoMs                                       | Forest IGs (YA, YB) vs CG: tension-anxiety, depression ↓* | YA vs YB: All outcomes: null | YB and YA vs DJY: PoMs total score and tension-anxiety, depression, fatigue↓*; vigour ↑* | Forest exposure showed a higher decrease in mood disturbance and the subscales of fatigue, tension-anxiety and depression and a higher increase in vigour compared to park exposure. tension-anxiety, depression, anger-hostility, fatigue, confusion ↓*; vigour ↑*                                                                                                    | Baseline all outcomes: null | Follow up All mood subcomponents: null | Not measured |
|--------------------------------------------------------------------|------------------------------------------------------------|-------------------------------------------------------------------------------------|----------------------------------------------------------------------------------------------------|------------------------------------------------------------------------------------|-------------------------------------------------------------------------------------------------------|--------------------------------------------------------|-----------------------------------------------------------|------------------------------|------------------------------------------------------------------------------------------|------------------------------------------------------------------------------------------------------------------------------------------------------------------------------------------------------------------------------------------------------------------------------------------------------------------------------------------------------------------------|-----------------------------|----------------------------------------|--------------|
| Lyu 2019a <sup>(75)</sup> and Lyu 2019b <sup>(76)</sup><br>Sichuan | RCT, P, 4-arm (3IG, 1CG)<br>120(NR),<br>n=30 at each group | Healthy university students F: 50%<br>19-24 y mean 21.7 ± 0.4 (SE) y                | IGs: bamboo forests (YA), bamboo forests (YB), and bamboo park (DJY)<br>CG: urban environment (CS) | Viewing the site in the morning and then walking in the afternoon each for 15 mins | Mood and its subcomponents (tension-anxiety, depression, anger-hostility, fatigue, confusion, vigour) | Subjective: PoMs↓ after test                           |                                                           |                              |                                                                                          | All types of exposure to bamboo forest or park significantly decreased mood disturbance, anger-hostility, fatigue, confusion, and increased vigour compared to the control group. Two bamboo forests exposure significantly decreased tension-anxiety and depression but not the bamboo park. The change in mood outcomes was not different in the two bamboo forests. |                             |                                        | Not measured |
| Mao 2012a <sup>(77)</sup><br>Zhejiang                              | RCT, p, 2-arm<br>24(0), IG: 12, CG: 12                     | Elderly patients with essential hypertension and CHF class I-III<br>F: NR<br>60-75y | IG: Forest<br>CG: Urban environment                                                                | Walking in the site for 1.5h twice a day with a 20-min rest during the walk        | Mood subcomponents (tension-anxiety, depression, anger-hostility, fatigue, confusion, vigour)         | Subjective: PoMs subscales ↓ before and after the test |                                                           |                              |                                                                                          | No significant difference between groups at baseline and follow up.                                                                                                                                                                                                                                                                                                    |                             |                                        | Not measured |

|                                                                  |                                                |                                                                         |                                     |                                                                                                                                               |                                                                                               |                                                        |                                                                                                                                                      |                                                                                                                                                                                                                                                                                                                                        |              |
|------------------------------------------------------------------|------------------------------------------------|-------------------------------------------------------------------------|-------------------------------------|-----------------------------------------------------------------------------------------------------------------------------------------------|-----------------------------------------------------------------------------------------------|--------------------------------------------------------|------------------------------------------------------------------------------------------------------------------------------------------------------|----------------------------------------------------------------------------------------------------------------------------------------------------------------------------------------------------------------------------------------------------------------------------------------------------------------------------------------|--------------|
| Mao 2012b <sup>(78)</sup><br>Zhejiang                            | RCT, P, 2-arm<br>20, n=10 at each group        | Healthy university students<br>F: 0%<br>Mean 20.8±0.5 y                 | IG: Forest<br>CG: Urban environment | Walking in the site for 1.5h twice a day with a 20-min rest during the walk                                                                   | Mood subcomponents (tension-anxiety, depression, anger-hostility, fatigue, confusion, vigour) | Subjective: PoMs subscales   before and after the test | <b>Baseline</b> all outcomes: null<br><br><b>Follow up</b><br>Tension-anxiety, depression, anger-hostility, fatigue: ↓*; vigour: ↑*; confusion: null | No significant difference between groups at baseline.<br>Walking in a forest significantly decreased PoMs subcomponents of tension-anxiety, depression, anger-hostility, fatigue and increased PoMs of vigour compared to walking in the urban environment.<br>No significant difference between groups at baseline.                   | Not measured |
| Mao 2017 <sup>(79)</sup> and Wu 2017 <sup>(80)</sup><br>Zhejiang | RCT, P 2-arm<br>36 (3), IG: 24 (1), CG: 12 (2) | Elderly patients with CHF class I-III<br>F: 39%<br>65-80, mean 71 ± 4 y | IG: Forest<br>CG: Urban environment | Walking in the site for 1.5h twice a day with a 20-min rest during the walk                                                                   | Mood subcomponents (tension-anxiety, depression, anger-hostility, fatigue, confusion, vigour) | Subjective: PoMs subscales   before and after the test | <b>Baseline</b> all outcomes: null<br><br><b>Follow up</b><br>Tension-anxiety, depression: ↓*; anger-hostility, fatigue, confusion, vigour: null     | Forest bathing significantly decreased the tension-anxiety and depression subscale of mood compared to the control group.<br>Residential green space measured within road network buffer was negatively and significantly associated with mental disorders.<br>The association was weaker when the circular buffer measures were used. | Not measured |
| Qiu 2019 <sup>(35)</sup><br>Guangdong                            | CSS<br>1, 150(0)                               | General population aged 18+ y<br>F: 48%<br>Mean 40.6 ± 11.1 y           | Residential green space per capita  | GIS spatial within Road Network Buffer (based on the street network and walk time), and within 0.5 km, 1 km radii around the residential area | Mental health                                                                                 | Subjective: GHQ-12                                     | GIS road network buffer: (-)*<br>GIS 0.5km: (-)<br>GIS 1km: null                                                                                     |                                                                                                                                                                                                                                                                                                                                        | Not measured |

|                                                                             |                                                 |                                                                                                                                                   |                                                                                         |                                                                                                      |                               |                                                |                                                                                                                                                                              |                                                                                                                                                                                        |                                                                                                                                                                                                                                                                                                                                                                                       |
|-----------------------------------------------------------------------------|-------------------------------------------------|---------------------------------------------------------------------------------------------------------------------------------------------------|-----------------------------------------------------------------------------------------|------------------------------------------------------------------------------------------------------|-------------------------------|------------------------------------------------|------------------------------------------------------------------------------------------------------------------------------------------------------------------------------|----------------------------------------------------------------------------------------------------------------------------------------------------------------------------------------|---------------------------------------------------------------------------------------------------------------------------------------------------------------------------------------------------------------------------------------------------------------------------------------------------------------------------------------------------------------------------------------|
| Tang 2020 <sup>(39)</sup><br>Jiangsu                                        | CSS<br>Total: 591<br>Local: 412<br>Laopiao: 179 | Local older population (no migrants)<br>F: 37%<br>60+ y<br>Laopiao migrants: older migrants due to being dependent on children<br>F: 54%<br>60+ y | Proximity to park                                                                       | Distance between the entrance of the surveyed community and the nearest public park.                 | Mental health                 | Subjective: one item on a 5-point Likert scale | Local: (-)*<br>Laopiao: null                                                                                                                                                 | Proximity to park was positively and significantly associated with self-rated mental health in local elderly but not in elderly who migrated due to being dependent on their children. | Social capital has a mediating effect, and when interred into the regression model, the association was no longer significant.                                                                                                                                                                                                                                                        |
| Wang Z. 2020 <sup>(45)</sup><br>Anhui                                       | CSS<br>150(28)                                  | Residents living around the Tangxi River Park within 1.5 km radius and appeared in the park<br>F: 33%<br>NR y                                     | Time spent in the park (min)                                                            | Subjective: departure time minus arrival time                                                        | Mental Health                 | Subjective: SF-12                              | (+)*                                                                                                                                                                         | Self-reported time spent in a park was positively and significantly associated with mental health.                                                                                     | Not measured                                                                                                                                                                                                                                                                                                                                                                          |
| Wang R. 2020 <sup>(44)</sup> and Wang R. 2019a <sup>(42)</sup><br>Guangdong | CSS<br>1,029(0)                                 | Adult population<br>F: 50%<br>Mean 41.2 ±13.6 y                                                                                                   | Residential green space, street view green space(tree), street view green space (grass) | NDVI, street view green space tree and grass within 1 km radius around the residential neighbourhood | Well-being, stress (mediator) | Subjective: WHO-5, one question on stress      | NDVI: well-being: (+)*, stress: null<br><br><b>Street view green space-Grass:</b> well-being (+)*, stress (-)*<br><br><b>Street view green space - Tree:</b> well-being (+)* | Residential green space and street view green space were positively and significantly associated with well-being. Street view green space was negatively associated with stress        | NDVI: Physical activity and social cohesion partially mediated the association accounting for 22% of the association, but there was no mediation effect for stress, air quality and noise.<br>Street view greenspace: Physical activity, stress, air quality and noise, and social cohesion explained 62% of the association. Leisure satisfaction partially modified the association |

|                                         |                                  |                                                                                           |                                          |                                                                                                                                                |                                 |                                               |                                                                                                                                                                                                                                         |                                                                                                                                                                                                                                    |                                                                                                                                  |
|-----------------------------------------|----------------------------------|-------------------------------------------------------------------------------------------|------------------------------------------|------------------------------------------------------------------------------------------------------------------------------------------------|---------------------------------|-----------------------------------------------|-----------------------------------------------------------------------------------------------------------------------------------------------------------------------------------------------------------------------------------------|------------------------------------------------------------------------------------------------------------------------------------------------------------------------------------------------------------------------------------|----------------------------------------------------------------------------------------------------------------------------------|
| Xue 2019 <sup>(49)</sup><br>All         | Quasi-experimental<br>21,543(NR) | General population<br>F: 52%<br>18+ y                                                     | County level green space                 | Mean annual NDVI at the county level                                                                                                           | Mental health                   | Subjective: MHSs                              | OR: (+)*<br>β: (+)<br>per 0.05 increase in the NDVI                                                                                                                                                                                     | County level green space has been positively associated with mental health; the strength of the association varied based on the types of analysis.                                                                                 | Association was stronger for people with a high level of physical activity.                                                      |
| Yang 2019d <sup>(53)</sup><br>Liaoning  | CSS<br>59,754(0)                 | School or kindergarten children living in the area for 2+y<br>F: 49%<br>Mean 10.3 ± 3.6 y | Green space around the school            | NDVI and SAVI within 0.1 km, 0.5 km, 1 km radii around the school or kindergarten                                                              | ADHD                            | Subjective: ADHD DSM-IV questionnaire         | NDVI and SAVI 0.1km, 0.5km and 1km: (-)*<br>per 0.1 unit increase in NDVI                                                                                                                                                               | Green space around the school was negatively and significantly associated with ADHD.                                                                                                                                               | Age, sex and household income, type of home district, and dog ownership did not show any effect modification of the association. |
| Yang 2020a <sup>(54)</sup><br>Guangdong | CSS<br>591(0)                    | Migrants to Shenzhen<br>F: 44<br>18 -68 y, mean 31.4y                                     | Perceived residential green space        | Subjective: level of greenness on 5-point Likert scale                                                                                         | Mental health                   | Subjective: GHQ-12                            | (-)*                                                                                                                                                                                                                                    | Perceived residential green space was negatively and significantly associated with mental disorders measured by GHQ-12.                                                                                                            | Social cohesion and perceived air pollution and noise mediated the association.                                                  |
| Yang T. 2019 <sup>(57)</sup><br>All     | CSS<br>11,954                    | University medical students<br>F: 56%<br>Mean ~22                                         | City green space per capita and coverage | Per capita public green space in a city and public green land as a proportion of the total area of a city by the National Bureau of Statistics | Uncertainty Stress, life stress | Subjective: An author-developed questionnaire | <b>Uncertainty Stress</b><br>Green space < 30 ha/1000 person vs 30–39 and vs 40 and over (-)*;<br>Green space coverage < 35 ha/km2: reference vs 40 and over: (-)*<br><br><b>Life stress</b><br>Greenspace and green space coverage (-) | Green space per capita higher than 30 ha per 1000 persons and coverage higher than 35 ha/km2 were negatively and significantly associated with uncertainty stress. The association for life stress was weaker and not significant. | Not measured                                                                                                                     |

|                                 |                     |                                                                         |                                                                                |                                                                                                                                                                                                                                  |                                                                                                                |                                                                                                                  |                                                   |                                                                                                                                                                                             |                                                             |
|---------------------------------|---------------------|-------------------------------------------------------------------------|--------------------------------------------------------------------------------|----------------------------------------------------------------------------------------------------------------------------------------------------------------------------------------------------------------------------------|----------------------------------------------------------------------------------------------------------------|------------------------------------------------------------------------------------------------------------------|---------------------------------------------------|---------------------------------------------------------------------------------------------------------------------------------------------------------------------------------------------|-------------------------------------------------------------|
| Zhang 2018<br>(61)<br>Guangdong | CSS<br>1, 003(NR)   | General population<br>F:51%<br>19-59 y                                  | Green space<br>coverage around<br>individuals' activity<br>space and proximity | Green space coverage<br>within 1km radius<br>around the<br>individual's activity<br>space (locations where<br>an individual<br>undertakes daily<br>activities) and<br>proximity to the<br>greenspace combined<br>as one variable | Mental health and well-<br>being                                                                               | Subjective: SF-<br>36, WHO-5,<br>Social<br>Cohesion and<br>Trust Scale,<br>Social Well-<br>being Scale,<br>SSL-I | Mental health, social<br>health: (+) *            | Green space around the<br>individuals' activity area<br>was positively associated<br>with mental health.                                                                                    | Physical activity<br>partially mediated<br>the association. |
| Zhang 2019<br>(62)<br>Jiangsu   | CSS<br>455(0)       | Adult population<br>F:50%<br>60+ y                                      | Perceived residential<br>green space                                           | Subjective                                                                                                                                                                                                                       | QoL mental health<br>subcomponents (and social<br>relationship)                                                | Subjective:<br>WHOQOL-<br>BREF                                                                                   | Mental health: (+)*;<br>Social relationship: null | Perceived residential<br>green space was positively<br>and significantly<br>associated with mental<br>health subcomponents of<br>QoL but not with overall<br>QoL or other<br>subcomponents. | Not measured                                                |
| Zhao 2019<br>(63)<br>All        | CSS<br>~159 million | Weibo website active<br>users (both men and<br>women)<br>F: NR%<br>NR y | Residential green<br>space coverage                                            | % green space around<br>the residential area<br>from National Bureau<br>of Statistics                                                                                                                                            | Well-being and its five<br>domains (positive emotion,<br>engagement, relationship,<br>meaning, accomplishment) | Subjective:<br>Lexica<br>analysis of<br>social media<br>posts based<br>on the<br>PERMA<br>theory                 | Total well-being and its<br>five domains: (+)*    | Residential green space<br>was positively and<br>significantly associated<br>with well-being and its<br>five domains presented in<br>social medial posts.                                   | Not measured                                                |

|                                |                |                                                                                          |                                                  |                                                                                                                                                     |                                               |                                                                                           |                                                                                                                                                                                                                                                                                                                                                                                                                                                                                                                                                             |                                                                                                                                                                                                                                                                                                                                                                                                                                                                    |                                                                                                                                                                                                                      |
|--------------------------------|----------------|------------------------------------------------------------------------------------------|--------------------------------------------------|-----------------------------------------------------------------------------------------------------------------------------------------------------|-----------------------------------------------|-------------------------------------------------------------------------------------------|-------------------------------------------------------------------------------------------------------------------------------------------------------------------------------------------------------------------------------------------------------------------------------------------------------------------------------------------------------------------------------------------------------------------------------------------------------------------------------------------------------------------------------------------------------------|--------------------------------------------------------------------------------------------------------------------------------------------------------------------------------------------------------------------------------------------------------------------------------------------------------------------------------------------------------------------------------------------------------------------------------------------------------------------|----------------------------------------------------------------------------------------------------------------------------------------------------------------------------------------------------------------------|
| Zhou 2019<br>(83)<br>Guizhou   | BAS<br>43(NR)  | Healthy university students with no major disease<br>F: 81%<br>Mean 20.74 ± SE, 0.92 y   | Urban park or rural park                         | One day walk in the park with 4 activities of freely walk (1), play a group game (2), have lunch and do shopping (3), and enjoy the nature view (4) | Stress for university or life related factors | Subjective: validated stress questionnaire for Chinese students before and after the test | <p><b>Urban Park:</b> stress for financial state, exam pressure, love-affair relationship (-)*; stress for campus life, employment worry, graduate uncertainty, lesson satisfaction, teacher satisfaction, study interest, inter-communication, room-mate contact: null</p> <p><b>Rural park:</b> stress for campus life and financial state: (-)*; stress for exam pressure, love-affair relationship, employment worry, graduate uncertainty, lesson satisfaction, teacher satisfaction, study interest, inter-communication, room-mate contact: null</p> | <p>One day walk in the urban park decreased stress scores of financial state, exam pressure and love-affair relationship compared to the baseline values and one day walk in the rural park decreased stress of campus life and financial state.</p> <p>Other scores such as Employment worry, Graduate uncertainty, Lesson satisfaction, Teacher satisfaction, Study interest, Inter-communication, Room-mate contact did show any change after intervention.</p> | Participants tended to perceive more decline of anxiety from social contact in the urban forest than rural.                                                                                                          |
| Zhou 2020<br>(65)<br>Guangdong | CSS<br>972(NR) | Older population living in Guangzhou at least 6+ months<br>F: 67%<br>60+ y, mostly 60-74 | Residential green space, street view green space | NDVI within 1 km radius around the district Community, digital photographs                                                                          | mental health                                 | Subjective: Self-report                                                                   | <p>NDVI: (+)*</p> <p>Street view green space: null</p>                                                                                                                                                                                                                                                                                                                                                                                                                                                                                                      | NDVI was associated with better mental health.                                                                                                                                                                                                                                                                                                                                                                                                                     | <p>Social integration mediated the effect of green space on mental health. Air pollution did not have a mediating effect.</p> <p>Income, sex, residence status and marital status regulate the mediation effect.</p> |

## General health outcomes

| Author Year<br>province | Study design<br>Sample size<br>(attrition) | Population (health condition, %female, age) | Environment focus | Exposure/intervention measures and follow ups | Outcomes measured | Method of [outcomes] measurement/ time points measured | Results<br>* p<0.05 | Summary of findings | Mediation of effect moderation |
|-------------------------|--------------------------------------------|---------------------------------------------|-------------------|-----------------------------------------------|-------------------|--------------------------------------------------------|---------------------|---------------------|--------------------------------|
|-------------------------|--------------------------------------------|---------------------------------------------|-------------------|-----------------------------------------------|-------------------|--------------------------------------------------------|---------------------|---------------------|--------------------------------|

|                                |                                                                          |                                                                            |                                                                     |                                                                                                                                                                                                                                                                                                                                         |                                                                        |                      |                                                                                                               |                                                                                                                                                                                                                                                                                      |                                                                |
|--------------------------------|--------------------------------------------------------------------------|----------------------------------------------------------------------------|---------------------------------------------------------------------|-----------------------------------------------------------------------------------------------------------------------------------------------------------------------------------------------------------------------------------------------------------------------------------------------------------------------------------------|------------------------------------------------------------------------|----------------------|---------------------------------------------------------------------------------------------------------------|--------------------------------------------------------------------------------------------------------------------------------------------------------------------------------------------------------------------------------------------------------------------------------------|----------------------------------------------------------------|
| Chang 2019<br>(2)<br>All       | CSS<br>663(NR)                                                           | Urban middle-aged<br>citizens<br>F:50%<br>40–65 y                          | Park visit                                                          | Subjective: frequency<br>of leisure activity in<br>nature (visiting park<br>or outdoor exercise)                                                                                                                                                                                                                                        | Health                                                                 | Subjective:<br>SWBS, | (+)*                                                                                                          | Subjective frequency of<br>green space use was<br>positively and<br>significantly associated<br>with overall health.                                                                                                                                                                 | Leisure satisfaction<br>partially modified<br>the association. |
| Chen 2017 (3)<br>Sichuan       | CSS<br>Total: 6571(NR)<br>Urban: 3402<br>Rural: 2439                     | Urban or rural<br>residents or a<br>combination of both<br>F: 47%<br>~47 y | Residential green<br>space                                          | Subjective: binary<br>question on the<br>shortage of greens<br>pace                                                                                                                                                                                                                                                                     | Physical health                                                        | Subjective-<br>1item | Urban and rural residents<br>combined, urban residents:<br>↑*<br>Rural resident: null                         | Residential green space<br>was significantly<br>associated with physical<br>health in the urban<br>residents but not in rural<br>residents.                                                                                                                                          | Not measured                                                   |
| Chen 2019 (4)<br>Beijing       | CSS<br>7000(3709)                                                        | General population<br>F: 51%<br>16+ y, mostly 20–39 y                      | Proximity to park                                                   | straight-line distance<br>in metres from each<br>residential location to<br>the nearest park, and<br>within <0.5 km, 1<br>km, 2 km, 3 km, 4 km<br>buffer<br>% of green space<br>within 1 km radius<br>around the residential<br>neighbourhood,<br>The shortest line from<br>a residential<br>neighbourhood to the<br>nearest greenspace | Self-rated health                                                      | Subjective           | Proximity to park: (+)*<br>Proximity to park <0.5km:<br>(+)*<br>proximity to park 1km,<br>2km, 3km, 4km: null | Proximity to park in<br><0.5km buffer was<br>positively and<br>significantly associated<br>with self-rated health but<br>not in buffers higher than<br>0.5km.                                                                                                                        | Not measured                                                   |
| Huang 2019<br>(11)<br>Shanghai | CSS<br>8, 423(461)                                                       | Older population<br>F: 49%<br>65+ y                                        | Residential green<br>space coverage,<br>proximity to green<br>space |                                                                                                                                                                                                                                                                                                                                         | Self-rated health (good,<br>fair, poor)                                | Subjective           | % green space: (+)*<br>Proximity to park: (+)*                                                                | Residential green space<br>and proximity to the park<br>were positively and<br>significantly associated<br>with better self-rated<br>health.                                                                                                                                         | Not measured                                                   |
| Huang<br>2020a (12)            | CSS<br>Total: 368,<br>399(NR)<br>Urban: 96,<br>442<br>Rural: 271,<br>957 | Older population<br>F: 51%<br>60+ y                                        | Township-level<br>green space                                       | NDVI within 1km<br>radius around the<br>centroid of their<br>township-level<br>division (sensitivity<br>analysis with radii of<br>1.5 km, 3 km or 8 km)                                                                                                                                                                                 | Self-rated health (good,<br>fair, poor, can't take care of<br>oneself) | Subjective           | All: (+)*<br>Urban: (+)*<br>Rural: (+)*<br>per IQR increase in NDVI                                           | Residential green space<br>was positively and<br>significantly associated<br>with self-rated health in<br>both urban and rural<br>areas. The association was<br>stronger in the urban area<br>compared to the rural.<br>*Sensitivity analyses<br>support the study main<br>findings. | Not measured                                                   |

|                                          |                  |                                                                                                                           |                                 |                                                                                             |                                      |                                  |                                                                                  |                                                                                                                                                                                |                                                                                                                                                                                                                                                                                                                                                                                                                   |
|------------------------------------------|------------------|---------------------------------------------------------------------------------------------------------------------------|---------------------------------|---------------------------------------------------------------------------------------------|--------------------------------------|----------------------------------|----------------------------------------------------------------------------------|--------------------------------------------------------------------------------------------------------------------------------------------------------------------------------|-------------------------------------------------------------------------------------------------------------------------------------------------------------------------------------------------------------------------------------------------------------------------------------------------------------------------------------------------------------------------------------------------------------------|
| Liu 2017 <sup>(26)</sup><br>Beijing      | CSS<br>50(0)     | General population<br>F: 51.5%<br>10–60 y                                                                                 | Park visit                      | Subjective: time spent<br>at the last visit to the<br>park                                  | Self-rated health                    | Subjective                       | (+)*                                                                             | Time spent in the last visit<br>to the park was positively<br>and significantly<br>associated with an<br>immediate change in self-<br>report health status after<br>the visit. | Not measured                                                                                                                                                                                                                                                                                                                                                                                                      |
| Peng 2020 <sup>(34)</sup><br>All         | CSS<br>1, 067(0) | Older population<br>with long-term care<br>insurance<br>F: 59%<br>60+ y, mean 82.40<br>±7.68 y                            | Residential green<br>space      | Mean NDVI within<br>0.25 km, 0.5 km and 1<br>km radii around the<br>residential addresses   | Frailty                              | Objective:<br>Basic ADL,<br>IDAL | BADL: 3rd tertile vs 1st<br>tertile (-)* in all NDVIs<br>IADL: Null in all NDVIs | Being in the highest tertile<br>of residential green space<br>protected BADL<br>development compared to<br>being in the lowest tertile<br>but not for IADL.                    | Stronger protective<br>effects on BADL<br>were found among<br>participants who<br>were male, older<br>(≥75 years), had<br>lower education,<br>were married, had<br>no diseases, and<br>lived in a non-central<br>and somewhat<br>walkable area.<br>The association for<br>IADL was significant<br>in participants with<br>lower education and<br>who lived in a non-<br>central and<br>somewhat walkable<br>area. |
| Wang Z.<br>2020 <sup>(45)</sup><br>Anhui | CSS<br>150(28)   | Residents living<br>around the Tangxi<br>River Park within 1.5<br>km radius and<br>appeared in the park<br>F: 33%<br>NR y | Time spent in the<br>park (min) | Subjective: departure<br>time minus arrival<br>time                                         | Physical Health                      | Subjective: SF-<br>12            | (+)*                                                                             | Self-reported time spent in<br>a park was positively and<br>significantly associated<br>with physical health.                                                                  | Not measured                                                                                                                                                                                                                                                                                                                                                                                                      |
| Xie 2018 <sup>(47)</sup><br>Hubei        | CSS<br>731(31)   | Older population<br>appeared in public<br>space spaces<br>F: 57%<br>60+ y                                                 | Accessibility to park           | Nearest distance from<br>the residence to the<br>nearest parks based on<br>the road network | Overall chronic health<br>conditions | subjective                       | null                                                                             | Accessibility to the park<br>did not show any<br>association with subjective<br>chronic health conditions.                                                                     | Not measured                                                                                                                                                                                                                                                                                                                                                                                                      |



|                                              |                                                                           |                                                                                             |                                                                                |                                                                                                                                                                                                                                  |                                         |                                |                                                                                                                                                                                      |                                                                                                                                                       |                                                                                                                                                 |
|----------------------------------------------|---------------------------------------------------------------------------|---------------------------------------------------------------------------------------------|--------------------------------------------------------------------------------|----------------------------------------------------------------------------------------------------------------------------------------------------------------------------------------------------------------------------------|-----------------------------------------|--------------------------------|--------------------------------------------------------------------------------------------------------------------------------------------------------------------------------------|-------------------------------------------------------------------------------------------------------------------------------------------------------|-------------------------------------------------------------------------------------------------------------------------------------------------|
| Ying 2015 <sup>(58)</sup><br>Shanghai        | CSS<br>1, 100(0)                                                          | Adults<br>independently<br>ambulatory with<br>intact cognition<br>F: NR<br>46-80 y          | Residential green<br>space per capita,<br>proximity to park                    | Green space coverage<br>within 0.5 km radius<br>of residential area per<br>capita, from a national<br>database                                                                                                                   | Self-rated health                       | Subjective                     | Green space/person: (+)*<br>Proximity to park: null                                                                                                                                  | Residential green space<br>was significantly<br>associated with self-rated<br>health. No association was<br>found for proximity to the<br>park.       | Not measured                                                                                                                                    |
| Zhang 2018 <sup>(61)</sup><br>Guangdong      | CSS<br>1, 003                                                             | General population<br>F: 51%<br>19-59 y                                                     | Green space<br>coverage around<br>individual's activity<br>space and proximity | Green space coverage<br>within 1km radius<br>around the<br>individual's activity<br>space (locations where<br>an individual<br>undertakes daily<br>activities) and<br>proximity to the<br>greenspace combined<br>as one variable | Physical health                         | Subjective: SF-<br>36          | Total effect: (+)*<br>Direct effect: null                                                                                                                                            | Green space around<br>individuals' activity areas<br>was positively associated<br>with physical health.                                               | Physical activity<br>fully mediated the<br>association between<br>green space and<br>physical health.                                           |
| Zhang 2019 <sup>(62)</sup><br>Jiangsu        | CSS<br>455(0)                                                             | Adult population<br>F:50%<br>60+ y                                                          | Perceived residential<br>green space                                           | Subjective                                                                                                                                                                                                                       | QoL and physical health<br>subcomponent | Subjective:<br>WHOQOL-<br>BREF | QoL total, physical health:<br>null                                                                                                                                                  | Perceived residential<br>green space was not<br>associated with the overall<br>QoL or physical health.                                                | Not measured                                                                                                                                    |
| Zhou 2020 <sup>(65)</sup><br>Guangdong       | CSS<br>972(NR)                                                            | Older population<br>living in Guangzhou<br>for 6+ months<br>F: 67%<br>60+ y, mostly 60-74 y | Residential green<br>space, street view<br>green space                         | NDVI within 1 km<br>radius around the<br>district Community,<br>digital photographs                                                                                                                                              | Physical health                         | Subjective:<br>Self-report     | NDVI: (+)<br>Street view green space:<br>(+)*                                                                                                                                        | NDVI was associated with<br>better physical health (ns).<br>Street view green space<br>was significantly<br>associated with better<br>physical health | Physical activity<br>mediated the effect<br>of the streetscape on<br>physical health. No<br>mediating effect for<br>air pollution was<br>found. |
| Zhu 2019a-<br>study 2 <sup>(66)</sup><br>All | CS, pros<br>19,076 for<br>ADL<br>outcome<br>15,656 for<br>IADL<br>outcome | Older population<br>from CLHLS cohort<br>F: 59%<br>65+ y                                    | Residential green<br>space                                                     | Mean NDVI within 0.5<br>km radius around the<br>residential address<br>Follow up: 14 y                                                                                                                                           | Frailty                                 | Subjective:<br>ADL, IADL       | 1st QR=ref<br>2nd and 3rd QR: ADL,<br>IADL: null<br>4th QR: ADL, IADL (-)*<br>0.1-unit of NDVI: ADL,<br>IADL: (-)*<br>Developing disabilities<br>among healthy<br>participants: (-)* | Baseline green space was<br>negatively related to<br>disabilities in follow-ups<br>and developing<br>disabilities in healthy<br>participants.         | Not measured                                                                                                                                    |

| Zhu 2019a-study 1 <sup>(66)</sup><br>All                         | CSS<br>38,679(1,876) for ADL outcome<br>33,797 (1,481) for IADL outcome | Older population from CLHLS cohort<br>F: 59%<br>65+ y, mean 88±11.5 y                       | Residential green space | Mean NDVI within 0.5 km radius around the residential address                               | Frailty                                                                                                                                                       | Subjective: ADL, IADL                                  | 1st QR=reference<br>2nd to 4th QR: ADL, IADL: (-)*<br>0.1-unit of NDVI: ADL, IADL: (-)*                                                                                                                                                                                        | Participants living in the higher quartile of residential greenness had lower ADL and IADL disabilities.                                                                                                                                                                                    | not measured                                                                                                                                                                                                                                                           |
|------------------------------------------------------------------|-------------------------------------------------------------------------|---------------------------------------------------------------------------------------------|-------------------------|---------------------------------------------------------------------------------------------|---------------------------------------------------------------------------------------------------------------------------------------------------------------|--------------------------------------------------------|--------------------------------------------------------------------------------------------------------------------------------------------------------------------------------------------------------------------------------------------------------------------------------|---------------------------------------------------------------------------------------------------------------------------------------------------------------------------------------------------------------------------------------------------------------------------------------------|------------------------------------------------------------------------------------------------------------------------------------------------------------------------------------------------------------------------------------------------------------------------|
| Zhu 2020b <sup>(69)</sup><br>All                                 | CS, pros<br>Total: 34,342 (18, 104)<br>Urban: 3, 266<br>Rural: 12, 972  | Older population (rural and urban) from CLHLS cohort<br>F: 56%<br>65+ y, mean 83.0 ± 11.5 y | Residential green space | Baseline mean NDVI within 0.5 km radius around the residential addresses<br>Follow up: 12 y | Frailty development, frailty change over time                                                                                                                 | Subjective: FI                                         | <b>Total:</b> 4th QR vs 1st QR: FI (-)*, 0.1-unit of NDVI: FI and FI change (-)*<br><b>Urban:</b> 2nd QR vs 1st QR (-)*, 0.1-unit of NDVI (-)*<br><b>Rural:</b> null                                                                                                           | Residential green space is significantly protected from frailty development and changes when analysed for all participants and urban residents but not for rural residents.                                                                                                                 | Not measured                                                                                                                                                                                                                                                           |
| <b>Cardiometabolic and cerebrovascular</b>                       |                                                                         |                                                                                             |                         |                                                                                             |                                                                                                                                                               |                                                        |                                                                                                                                                                                                                                                                                |                                                                                                                                                                                                                                                                                             |                                                                                                                                                                                                                                                                        |
| Author Year<br>province                                          | Study design<br>Sample size<br>(attrition)                              | Population (health condition, %female, age)                                                 | Environment focus       | Exposure/intervention measures and follow ups                                               | Outcomes measured                                                                                                                                             | Method of [outcomes] measurement/ time points measured | Results * p<0.05                                                                                                                                                                                                                                                               | Summary of findings                                                                                                                                                                                                                                                                         | Mediation of effect moderation                                                                                                                                                                                                                                         |
| Fan 2019 <sup>(7)</sup> and Fan 2020a <sup>(8)</sup><br>Xinjiang | CSS<br>4, 772(37)                                                       | Healthy Uyghur adults living in the area at for +2 y<br>F: 65%<br>47.5 ± 14.2 y             | Residential green space | NDVI and SAVI within 0.1 km, 0.3 km, 0.5 km, and 1 km radii around the residential address  | Lipid profile (LDL, HDL, TC, TG, hyperlipidaemia, hypercholesterolemia, hypoaliphalipoproteinemia, hypertriglyceridemia ), fasting glucose, diabetes mellitus | Objective: blood test                                  | <b>NDVI and SAVI 0.1km:</b> hypoaliphalipoproteinemia (-)*; rest of outcomes: null<br><b>NDVI and SAVI 0.3km:</b> TG(-)*; rest of outcomes: null<br><b>NDVI and SAVI 0.5km:</b> all outcomes null<br><b>NDVI and SAVI 1km:</b> diabetes mellitus: (-)*; rest of outcomes: null | Residential green space was negatively and significantly associated with hypoaliphalipoproteinemia and TG levels at 0.1 km and 0.3 km buffers, respectively but not other buffers of 0.5km and 1km. Green space was negatively associated with diabetes mellitus at the buffer of 1km only. | Associations of greenness with blood lipids were independent of physical activity, BMI, and air pollution. The protective effects of greenness on diabetes prevalence were significant only in women. However, none of the interactions was statistically significant. |

|                                   |                                                                              |                                                                                           |                                                          |                                                                                                                                                                     |                                                                                                                                     |                                  |                                                                                                                                                                                                                                                                                        |                                                                                                                                                                                                                                                                              |                                                                                      |
|-----------------------------------|------------------------------------------------------------------------------|-------------------------------------------------------------------------------------------|----------------------------------------------------------|---------------------------------------------------------------------------------------------------------------------------------------------------------------------|-------------------------------------------------------------------------------------------------------------------------------------|----------------------------------|----------------------------------------------------------------------------------------------------------------------------------------------------------------------------------------------------------------------------------------------------------------------------------------|------------------------------------------------------------------------------------------------------------------------------------------------------------------------------------------------------------------------------------------------------------------------------|--------------------------------------------------------------------------------------|
| Hassan 2018<br>(73)<br>Sichuan    | RCT, CO<br>60(0)                                                             | Healthy university<br>student<br>F: 50%<br>19-24 y, mean 19.6 ±<br>1.4 y                  | IG: Forest<br>CG: Urban<br>environment                   | A 15-minute walk in a<br>bamboo forest and a<br>city area for 2 days (24<br>hr wash out)                                                                            | SBP, DBP                                                                                                                            | Objective<br>before and<br>after | SBP, DBP: ↓*                                                                                                                                                                                                                                                                           | Forest walking<br>significantly decreased<br>SBD and DBP compared<br>to an urban walk among<br>health university students.                                                                                                                                                   | Not measured                                                                         |
| Jia 2018 (18)<br>Anhui            | CSS<br>Total: 2, 410<br>(466)<br>Middle<br>aged: 860<br>Older age: 1,<br>084 | Middle aged or older<br>population<br>F: 58%<br>Middle aged: 40-59 y<br>Older aged: 60+ y | Residential green<br>space                               | Neighbourhood NDVI                                                                                                                                                  | Hypertension, coronary<br>heart disease, stroke                                                                                     | Objective                        | All outcomes any age<br>group: (-)*                                                                                                                                                                                                                                                    | Residential green space<br>was negatively associated<br>with hypertension,<br>coronary heart disease<br>and stroke in both age<br>groups.                                                                                                                                    | 42.9% (16.7%,<br>104.8%) of<br>associations was<br>mediated by<br>physical activity. |
| Leng 2020<br>(19)<br>Heilongjiang | CSS<br>5, 342(1187)                                                          | Adult population<br>F: 48%<br>Mean 54.6 ±10.3 y                                           | Residential green<br>space coverage,<br>green view index | The proportion of<br>green space area<br>within neighbourhood<br>divided by the total<br>land area of the<br>neighbourhood-using<br>database, images of<br>the site | Hypertension,<br>dyslipidaemia, diabetes<br>mellitus, cardiovascular<br>health score, stroke risk                                   | Objective                        | % green space:<br>hypertension, stroke risk<br>(-)*; cardiovascular health<br>score (+)*<br><br>Green view index:<br>dyslipidaemia,<br>hypertension, stroke risk<br>(-)*; cardiovascular health<br>score (+)*<br><br>% green space and Green<br>view index: diabetes<br>mellitus: null | Residential green space<br>coverage and green view<br>index were negatively and<br>significantly were<br>associated with<br>cardiovascular risk factors<br>except for diabetes<br>mellitus. Dyslipidaemia<br>was negatively associated<br>with the green view index<br>only. | Not measured                                                                         |
| Liao 2019 (23)<br>Hubei           | CSS<br>6883(76)                                                              | pregnant women<br>attended first<br>parental visit<br>F: 100%<br>Any age                  | Residential green<br>space                               | NDV within a 300-m<br>circular buffer area<br>around the residential<br>address (sensitivity<br>analysis with 1km<br>radius)                                        | Maternal fasting glucose,<br>1-h glucose levels, 2-h<br>glucose levels, gestational<br>glucose intolerance and<br>diabetes mellitus | Objective                        | All outcomes: (-)*<br>per 1-SD green space<br>increase with a dose-<br>response relationship                                                                                                                                                                                           | Residential green space<br>was negatively and<br>significantly associated<br>with maternal blood<br>glucose levels, impaired<br>glucose tolerance, and<br>gestational diabetes<br>mellitus.                                                                                  | Not measured                                                                         |

|                                                                  |                                              |                                                                            |                                     |                                                                                        |                                                                                                      |                                                 |                                                                                                                           |                                                                                                                                                                                                                        |              |
|------------------------------------------------------------------|----------------------------------------------|----------------------------------------------------------------------------|-------------------------------------|----------------------------------------------------------------------------------------|------------------------------------------------------------------------------------------------------|-------------------------------------------------|---------------------------------------------------------------------------------------------------------------------------|------------------------------------------------------------------------------------------------------------------------------------------------------------------------------------------------------------------------|--------------|
| Mao 2012 <sup>(77)</sup><br>Zhejiang                             | RCT, P, 2-arm<br>24(0), IG: 12, CG: 12       | Elderly patients with hypertension and CHF class I-III<br>F: NR<br>60-75 y | IG: Forest<br>CG: Urban environment | Walking in the site for 1.5h twice a day with a 20-min rest during the walk for 7 days | ET-1, AT1, AT2, renin, angiotensinogen, Ang II, homocysteine<br>SBP, DBP, heart rate, pulse pressure | Objective: blood test before and after the test | Baseline all outcomes: null                                                                                               | No significant difference between groups at baseline.                                                                                                                                                                  | Not measured |
|                                                                  |                                              |                                                                            |                                     |                                                                                        |                                                                                                      |                                                 | Follow up<br>ET-1, AT1, angiotensinogen, SBP, DBP (↓)*<br>AT2, PP: ↓(ns)<br>renin, Ang II, homocysteine, heart rate: null | Walking in forest decreased cardiovascular disease-related markers<br>ET-1, AT1, angiotensinogen (p<0.05), AT2 (ns) and blood pressures (p<0.05) and pulse pressure (ns) compared to walking in the urban environment. |              |
|                                                                  |                                              |                                                                            |                                     |                                                                                        |                                                                                                      |                                                 |                                                                                                                           | No significant difference between groups at baseline.                                                                                                                                                                  |              |
| Mao 2012 <sup>(78)</sup><br>Zhejiang                             | RCT, P, 2-arm<br>20, n=10 at each group      | Healthy university students<br>F: 0%<br>Mean 20.8±0.5 y                    | IG: Forest<br>CG: Urban environment | Walking in the site for 1.5h twice a day with a 20-min rest during the walk for 2 days | ET-1,                                                                                                | Objective: blood test before and after the test | Baseline: null                                                                                                            | No significant difference between groups at baseline.                                                                                                                                                                  | Not measured |
|                                                                  |                                              |                                                                            |                                     |                                                                                        |                                                                                                      |                                                 | Follow up: ↓*                                                                                                             | Walking in a forest significantly decreased ET-1.                                                                                                                                                                      |              |
|                                                                  |                                              |                                                                            |                                     |                                                                                        |                                                                                                      |                                                 | Baseline all outcomes: null                                                                                               | No significant difference between groups at baseline.                                                                                                                                                                  |              |
| Mao 2017 <sup>(79)</sup> and Wu 2017 <sup>(80)</sup><br>Zhejiang | RCT, P 2-arm<br>36 (3), IG: 24 (1), CG:12(2) | Elderly patients with CHF class I-III<br>F: 39%<br>65-80 y, mean 71 ± 4 y  | IG: Forest<br>CG: Urban environment | Walking in the site for 1.5h twice a day with a 20-min rest during the walk for 4 days | BNP, NT-ProBNP, ET-1, AT1, AT2, renin, angiotensinogen, Ang II                                       | Objective: blood test before and after the test | Follow up<br>BNP, ET-1, renin, angiotensinogen, Ang II :↓*;<br>AT2: ↑*(compared to baseline);<br>AT1, NT-ProBNP: null     | Forest bathing significantly decreased cardiovascular disease-related markers (BNP, ProBNP, ET-1, renin, angiotensinogen, Ang II) compared to walking in the urban environment (CG).                                   | Not measured |
|                                                                  |                                              |                                                                            |                                     |                                                                                        |                                                                                                      |                                                 |                                                                                                                           |                                                                                                                                                                                                                        |              |
|                                                                  |                                              |                                                                            |                                     |                                                                                        |                                                                                                      |                                                 |                                                                                                                           |                                                                                                                                                                                                                        |              |

|                                       |                                               |                                                                                           |                                        |                                                                                                                        |                                      |                                                          |                                                                                                    |                                                                                                                                                                                                      |                                                                                                                                                                                                                        |
|---------------------------------------|-----------------------------------------------|-------------------------------------------------------------------------------------------|----------------------------------------|------------------------------------------------------------------------------------------------------------------------|--------------------------------------|----------------------------------------------------------|----------------------------------------------------------------------------------------------------|------------------------------------------------------------------------------------------------------------------------------------------------------------------------------------------------------|------------------------------------------------------------------------------------------------------------------------------------------------------------------------------------------------------------------------|
| Qu 2020 <sup>(36)</sup><br>Guangdong  | CSS<br>5, 237(0)                              | Pregnant women<br>without congenital<br>malformations<br>F: 100%<br>Mean 28.0 ± 4.7 y     | Residential green<br>space             | NDVI within 0.25 km,<br>0.5 km, 1 km, 3 km<br>radii around the<br>residential address<br>during pregnancy              | Gestational diabetes<br>mellitus     | Objective                                                | NDVI 0.25km, 0.5km, 1km:<br>(-)*<br>NDVI 3km: null                                                 | Residential green space<br>was negatively and<br>significantly was<br>associated with<br>gestational diabetes<br>mellitus at 0.25km, 0.5km,<br>1km buffers but not at<br>3km buffer.                 | The protective effect<br>of greenness on<br>gestational diabetes<br>mellitus was<br>stronger among<br>participants with<br>lower socioeconomic<br>status and in<br>environments with<br>lower-level air<br>pollutants. |
| Wu 2017-<br>study 2<br>Zhejiang       | RCT, P, 2-<br>arm<br>23(0), IG: 12,<br>CG: 11 | Elderly patients with<br>CHF class I-III<br>F:46%<br>65-80 y, mean 72.9 ±<br>5.9 y        | IG: Forest<br>CG: Urban<br>environment | Walking in the site for<br>1.5h twice a day with a<br>20-min rest during the<br>walk for 4 days                        | ET-1, renin                          | Objective:<br>blood test<br>before and<br>after the test | <b>Baseline</b> ET-1: null, renin:<br>↓* in CG<br><b>Follow up:</b> ET-1, renin: ↓*                | Renin concentration was<br>lower in the intervention<br>group at baseline.<br>Walking in the forest<br>significantly decreased<br>ET-1 and renin compared<br>to walking in the urban<br>environment. | Not measured                                                                                                                                                                                                           |
| Xiao 2020 <sup>(46)</sup><br>Liaoning | CSS<br>9, 354(0)                              | School children<br>living in the area for<br>2+y<br>F: 49%<br>4-18y, mean 10.9 ±<br>2.6 y | Green space around<br>the school       | NDVI and SAVI<br>within 0.5 km radius<br>around each school<br>(sensitivity analysis<br>with radii of 0.1 km, 1<br>km) | SBP, DBP, hypertension               | Objective                                                | NDVI and SAVI: SBP,<br>hypertension: (-)*; DBP:<br>null<br>per 0.1 unit increase in<br>green space | Green space around the<br>school was negatively and<br>significantly associated<br>with SBP and<br>hypertension prevalence<br>but not DBP.                                                           | The association for<br>boys was positive<br>(the higher<br>greenspace, the<br>higher DBP, while in<br>girls was reverse.                                                                                               |
| Xie 2018 <sup>(47)</sup><br>Hubei     | CSS<br>731(31)                                | Older population<br>appeared in public<br>space spaces<br>F: 57%<br>60+ y                 | Accessibility to park                  | Nearest distance from<br>the residence to the<br>nearest parks based on<br>the road network                            | cardio-cerebral vascular<br>diseases | Subjective                                               | 1st QR=reference<br>2nd QR: null<br>3rd QR: null<br>4th QR: (-)*                                   | Accessibility to park was<br>associated with a lower<br>odds of cardio-cerebral<br>vascular diseases at<br>quartile 4 compared to the<br>quartile of 1.                                              | Not measured                                                                                                                                                                                                           |

|                                                                                                                               |                                                                      |                                                                                                 |                            |                                                                                                                                                 |                                                                                                                                                                                                                                                                                                                                                                                |                                                                                                                                                                |                                                                                                                                                                                                                                                                                                                                                                                                  |                                                                                                                                                                                                                                                                                                                                                                                                                                                                                     |                                                                                                                                                                                                                                                                                                                                                                                                                                               |                                                                                                                                  |                      |                                             |                                                                                                                                                                                                   |                                                                                                                                                                                                                                                          |              |
|-------------------------------------------------------------------------------------------------------------------------------|----------------------------------------------------------------------|-------------------------------------------------------------------------------------------------|----------------------------|-------------------------------------------------------------------------------------------------------------------------------------------------|--------------------------------------------------------------------------------------------------------------------------------------------------------------------------------------------------------------------------------------------------------------------------------------------------------------------------------------------------------------------------------|----------------------------------------------------------------------------------------------------------------------------------------------------------------|--------------------------------------------------------------------------------------------------------------------------------------------------------------------------------------------------------------------------------------------------------------------------------------------------------------------------------------------------------------------------------------------------|-------------------------------------------------------------------------------------------------------------------------------------------------------------------------------------------------------------------------------------------------------------------------------------------------------------------------------------------------------------------------------------------------------------------------------------------------------------------------------------|-----------------------------------------------------------------------------------------------------------------------------------------------------------------------------------------------------------------------------------------------------------------------------------------------------------------------------------------------------------------------------------------------------------------------------------------------|----------------------------------------------------------------------------------------------------------------------------------|----------------------|---------------------------------------------|---------------------------------------------------------------------------------------------------------------------------------------------------------------------------------------------------|----------------------------------------------------------------------------------------------------------------------------------------------------------------------------------------------------------------------------------------------------------|--------------|
|                                                                                                                               |                                                                      |                                                                                                 |                            |                                                                                                                                                 |                                                                                                                                                                                                                                                                                                                                                                                |                                                                                                                                                                |                                                                                                                                                                                                                                                                                                                                                                                                  |                                                                                                                                                                                                                                                                                                                                                                                                                                                                                     |                                                                                                                                                                                                                                                                                                                                                                                                                                               | Air pollution and BMI explained 2.1–78% of the associations for most of the outcomes. No mediating effect for physical activity. |                      |                                             |                                                                                                                                                                                                   |                                                                                                                                                                                                                                                          |              |
| Yang 2019a <sup>(50)</sup> , Yang 2019c <sup>(52)</sup> , Yang 2020b <sup>(55)</sup> , Yang 2020c <sup>(56)</sup><br>Liaoning | CSS<br>24, 845(0),<br>15, 477<br>outcomes<br>with blood<br>test      | Healthy urban<br>dwellers with 5+ y<br>residence in the<br>study community<br>F ~46%<br>18-74 y | Residential green<br>space | NDVI, SAVI (and VCF<br>for some outcomes)<br>within 0.5 km (and<br>1km for sensitivity<br>analysis) around each<br>health community<br>centroid | Metabolic syndrome, SBP,<br>DBP, hypertension<br>prevalence, diabetes<br>mellitus, fasting glucose, 2-<br>h glucose, fasting insulin,<br>2-h insulin, HOMA-IR,<br>HOMA-B<br>Lipid profile (TC, TG,<br>HDL-C),<br>hypercholesterolemia,<br>hypertriglyceridemia,<br>hypoalphalipoproteinemi,<br>Lifetime CVD status (such<br>as myocardial infarction,<br>cerebral haemorrhage) | Objective:<br>blood test and<br>based on<br>Chinese<br>guidelines<br>(sensitivity<br>analysis with<br>various US,<br>international<br>and local<br>guidelines) | NDVI and SAVI (and<br>VCF) .05km: metabolic<br>syndrome, SBP, DBP,<br>hypertension prevalence,<br>diabetes mellitus, 2-h<br>glucose, fasting insulin, 2-h<br>insulin, HOMA-IR,<br>HOMA-B, TC, TG,<br>hypercholesterolemia,<br>hypertriglyceridemia,<br>lifetime CVD status: (-)*;<br>HDL-C: (+)*;<br>fasting insulin,<br>hypoalphalipoproteinemia:<br>null<br>per IQR increase in green<br>space | Residential green space<br>measured by NDVI, SAVI<br>(and VCF) was negatively<br>and significantly<br>associated with metabolic<br>syndrome, hypertension,<br>SBP, DBP, diabetes<br>mellitus and its blood<br>markers except for fasting<br>insulin,<br>hypercholesterolemia,<br>hypertriglyceridemia,<br>blood TC, TG, LDL-C<br>levels and CVD events. It<br>was also positively<br>associated with blood<br>HDL-C levels. Sensitivity<br>analysis supported the<br>main findings. | Greater association<br>for the metabolic<br>syndrome was<br>shown in<br>participants with<br>higher<br>household income<br>and younger age.<br>Association for<br>blood pressure<br>outcomes was<br>stronger among<br>women than men.<br>Association for<br>diabetes mellitus<br>prevalence was<br>stronger in younger<br>participants.<br>Associations for lipid<br>profile outcomes<br>were stronger for<br>women and older<br>individuals. |                                                                                                                                  |                      |                                             |                                                                                                                                                                                                   |                                                                                                                                                                                                                                                          |              |
| Zeng 2020b <sup>(81)</sup> and Lyu 2019b <sup>(76)</sup><br>Sichuan                                                           | RCT, P, 4-<br>arm (3IG,<br>1CG)<br>120(NR),<br>n=30 at each<br>group | Healthy university<br>students<br>F:50%<br>19-24 y, mean 21.7 ±<br>0.4 (SE) y                   |                            |                                                                                                                                                 |                                                                                                                                                                                                                                                                                                                                                                                |                                                                                                                                                                |                                                                                                                                                                                                                                                                                                                                                                                                  |                                                                                                                                                                                                                                                                                                                                                                                                                                                                                     | IGs: bamboo forests<br>(YA),<br>bamboo forests (YB),<br>and bamboo park<br>(DJY)<br>CG: urban<br>environment (CS)                                                                                                                                                                                                                                                                                                                             | 3 days of viewing the<br>site in the morning<br>and then walking in<br>the afternoon each for<br>15 mins                         | SBP, DBP, heart rate | Objective 1<br>before and<br>after the test | IG1 vs CG: SBP, DBP after<br>walking and viewing: ↓<br><br>IG2 vs CG: SBP, DBP,<br>heart rate after walking<br>and viewing ↓<br><br>IG3 vs CG: SBP after<br>walking ↓; heart rate and<br>DBP null | Viewing a bamboo forest<br>decreased SBP, DBP, heart<br>rate decreased (ns) after<br>walking and viewing the<br>bamboo forests.<br>SBP decreased after<br>walking (ns) in the<br>bamboo park compared to<br>walking or visiting an<br>urban environment. | Not measured |

|                                        |                     | 60(NR),<br>n=15 at each<br>group                                     | Sub-analysis of male<br>participants              |                                                                                 |                                                     |                   |                                                                                                 | SBP ↓*;<br>DBP, HR: null                                                                                                         | All types of exposure to<br>the bamboo forests or a<br>park significantly<br>decreased SBP compared<br>to the control group.                                                                                                                                                                         |                                   |
|----------------------------------------|---------------------|----------------------------------------------------------------------|---------------------------------------------------|---------------------------------------------------------------------------------|-----------------------------------------------------|-------------------|-------------------------------------------------------------------------------------------------|----------------------------------------------------------------------------------------------------------------------------------|------------------------------------------------------------------------------------------------------------------------------------------------------------------------------------------------------------------------------------------------------------------------------------------------------|-----------------------------------|
| Anthropometric outcomes                |                     |                                                                      |                                                   |                                                                                 |                                                     |                   |                                                                                                 |                                                                                                                                  |                                                                                                                                                                                                                                                                                                      |                                   |
| Author                                 | Year                | Study<br>design                                                      | Population (health<br>condition, %female,<br>age) | Environment focus                                                               | Exposure/intervention<br>measures and follow<br>ups | Outcomes measured | Method of<br>[outcomes]<br>measurement/<br>time points<br>measured                              | Results<br>* p<0.05                                                                                                              | Summary of findings                                                                                                                                                                                                                                                                                  | Mediation of effect<br>moderation |
| Bao 2021 <sup>(1)</sup><br>7 provinces | CSS<br>59, 540(219) | Children and<br>adolescents<br>F: 51.3%<br>Median 11 (IQR 9-15)<br>y | Green space around<br>the school                  | NDVI and SAVI<br>within 0.1 km, 0.5 km,<br>and 1 km radius<br>around the school | Overweight, obesity, Z-<br>score BMI, WC            | Objective         | All outcomes<br>NDVI0.1km: (-)*<br>NDVI0.5km: (-)*<br>NDVI1km:(-) *<br>per IQR increase in NDVI | Green space around the<br>school was negatively and<br>significantly associated<br>with obesity/overweight<br>and anthropometry. | PM2.5 partially<br>mediated the<br>association but not<br>Nitrogen<br>dioxide and physical<br>activity<br>The association for<br>the<br>obesity/overweight<br>outcome was<br>stronger among<br>older children<br>(age≥13 years), boys,<br>city-dwellers and<br>those with lower<br>educated parents. |                                   |

|                                           |                      |                                                                                        |                                                    |                                                                                                                                                                                                  |                                                |           |                                                                                           |                                                                                                                                                                  |                                                                                                                                                                                                                                                                                                                                                                                                                                                                                                                     |
|-------------------------------------------|----------------------|----------------------------------------------------------------------------------------|----------------------------------------------------|--------------------------------------------------------------------------------------------------------------------------------------------------------------------------------------------------|------------------------------------------------|-----------|-------------------------------------------------------------------------------------------|------------------------------------------------------------------------------------------------------------------------------------------------------------------|---------------------------------------------------------------------------------------------------------------------------------------------------------------------------------------------------------------------------------------------------------------------------------------------------------------------------------------------------------------------------------------------------------------------------------------------------------------------------------------------------------------------|
| Huang 2020b <sup>(13)</sup><br>All        | CSS<br>13,367(1,255) | Middle-aged population<br>F: 53%<br>50+ y                                              | Residential green space                            | NDVI within 1 km radius around the residential area (sensitivity analysis with radii of 0.5 km, 1.5 km, 2 km, and 3 km)                                                                          | Overweight/obesity, abdominal obesity          | Objective | Overweight/obesity: (-)*<br>Abdominal obesity: (-)*                                       | Residential green space was negatively and significantly associated with overweight/obesity. Sensitivity analyses support the study main findings.               | PM2.5 suppressed the association. Physical activity and the perennial mean temperature had not mediated effect. For obesity outcome, the association was stronger in women and older participants, and for abdominal obesity, the association was stronger in female, younger participants and lower educated participants. Air pollution partially (7.2–11.1%) mediated the association but not physical activity. Association was stronger for women, older participants, and those with lower household incomes. |
| Huang 2020c <sup>(14)</sup><br>Liaoning   | CSS<br>24,845(0)     | Healthy urban dwellers with 5+ y residence in the study community<br>F: 49%<br>18–74 y | Residential green space                            | Mean NDVI (and SAVI as sensitivity analysis) in 0.5 km and 1 km radii around each study health community's centroid                                                                              | BMI, WC, peripheral obesity, abdominal obesity | Objective | All outcomes except for WC<br>NDVI0.5-km: (-)*<br>NDVI1-km: (-)* per IQR increase in NDVI | Residential green space was negatively and significantly associated with BMI and peripheral and central obesity. Sensitivity analyses support the main findings. |                                                                                                                                                                                                                                                                                                                                                                                                                                                                                                                     |
| Leng 2020 <sup>(19)</sup><br>Heilongjiang | CSS<br>5,342(1187)   | Adult population<br>F: 48%<br>Mean 54.6 ±10.3 y                                        | Residential green space coverage, green view index | The proportion of green space area within neighbourhood divided by the total land area of the neighbourhood-using database, images of the site being analysed via visual interpretation software | Overweight/obesity,                            | Objective | % green space: (-)*<br>Green view index: (-)*                                             | Residential green space coverage and green view index negatively and significantly were associated with obesity and overweight.                                  | Not measured                                                                                                                                                                                                                                                                                                                                                                                                                                                                                                        |



| Liao 2020 <sup>(23)</sup><br>Hubei    | CSS<br>6,039                                  | Children<br>F:48%<br>5–6 y                                                | Residential green space, kindergarten green space, residence–kindergarten-weighted green space | Mean NDVIs within 0.1 km radius around the residential, kindergarten or both area                    | Obesity                                                                   | Subjective: CBCL subscale                                          | null                                                                                                                          | Kindergarten NDVI residence NDVI did not show any association with self-report obesity.                                                                               | NA                                         |
|---------------------------------------|-----------------------------------------------|---------------------------------------------------------------------------|------------------------------------------------------------------------------------------------|------------------------------------------------------------------------------------------------------|---------------------------------------------------------------------------|--------------------------------------------------------------------|-------------------------------------------------------------------------------------------------------------------------------|-----------------------------------------------------------------------------------------------------------------------------------------------------------------------|--------------------------------------------|
| Lu 2020 <sup>(30)</sup><br>Shanghai   | CSS<br>427(24)                                | General population who moved to a new green city<br>F: ~54<br>18–80 y     | Proximity to green space                                                                       | Subjective: time to nearest green space                                                              | BMI                                                                       | Subjective                                                         | null                                                                                                                          | Subjectively measured proximity to the park has no association with self-reported BMI.                                                                                | Not measured                               |
| Ying 2015 <sup>(58)</sup><br>Shanghai | CSS<br>1,100(0)                               | Adults independently ambulatory with intact cognition<br>F: NR<br>46–80 y | Residential green space per capita, proximity to park                                          | Green space coverage within 0.5 km radius of residential area per capita, from the national database | BMI, Overweight/obesity                                                   | Subjective Objective                                               | <b>Green space/ person:</b> BMI (-)*, overweight/overweight: null<br><b>proximity to park:</b> BMI, overweight/ obesity: (-)* | Residential green space and proximity to the park were negatively associated with BMI. Proximity to the park was also associated with overweight/ obesity prevalence. | Physical activity mediated the association |
| Zhou 2017 <sup>(64)</sup><br>All      | ES<br>189 districts                           | General population<br>F: NR<br>35–49 y                                    | District level green space coverage                                                            | % green space using Digital Land Use Map                                                             | BMI ( man), BMI (woman), obesity (man), obesity (woman), obesity (total): | NR                                                                 | BMI( man) , BMI (woman), obesity (man), obesity (woman), obesity (total): (-)*                                                | District level green space coverage was negatively and significantly associated with BMI and obesity in both men and women.                                           | not measured                               |
| <b>Respiratory outcomes</b>           |                                               |                                                                           |                                                                                                |                                                                                                      |                                                                           |                                                                    |                                                                                                                               |                                                                                                                                                                       |                                            |
| Author Year<br>province               | Study<br>design<br>Sample size<br>(attrition) | Population (health<br>condition, %female,<br>age)                         | Environment focus                                                                              | Exposure/intervention<br>measures and follow<br>ups                                                  | Outcomes measured                                                         | Method of<br>[outcomes]<br>measurement/<br>time points<br>measured | Results<br>* p<0.05                                                                                                           | Summary of findings                                                                                                                                                   | Mediation of effect<br>moderation          |

|                                      |                                                              |                                                                                                                                                                                                                   |                                                  |                                                                                                                                                                       |                                                                                                                        |                                                  |                                                                                                                                                |                                                                                                                                                                                                                                                                                                                                                                                  |                                                                                                                                                                                                                                                                                                                                                                                           |
|--------------------------------------|--------------------------------------------------------------|-------------------------------------------------------------------------------------------------------------------------------------------------------------------------------------------------------------------|--------------------------------------------------|-----------------------------------------------------------------------------------------------------------------------------------------------------------------------|------------------------------------------------------------------------------------------------------------------------|--------------------------------------------------|------------------------------------------------------------------------------------------------------------------------------------------------|----------------------------------------------------------------------------------------------------------------------------------------------------------------------------------------------------------------------------------------------------------------------------------------------------------------------------------------------------------------------------------|-------------------------------------------------------------------------------------------------------------------------------------------------------------------------------------------------------------------------------------------------------------------------------------------------------------------------------------------------------------------------------------------|
| Fan 2020b <sup>(9)</sup><br>All      | CSS<br>Total: 75, 107<br>(8355)<br>COPD: 9,<br>134           | Adults lived in the<br>area for the last +6<br>months, no<br>individuals stayed in<br>a communal<br>residence<br>F: non-COPD: 54%<br>COPD: 37%<br>40+ y, mean non-<br>COPD: 53.3 ± 14.3 y,<br>COPD: 61.6 ± 13.6 y | Residential green<br>space                       | Mean of 5-year NDVI<br>preceding the survey<br>within 0.1 km, 0.3 km,<br>0.5 km, 1 km, 2 km<br>and 3 km radii around<br>the residential<br>community                  | COPD                                                                                                                   | Objective:<br>Spirometry                         | (+)*<br>per IQR increase in NDVI                                                                                                               | Higher levels of<br>residential<br>green space was<br>associated with an<br>increased risk of COPD<br>across all NDVI buffers.                                                                                                                                                                                                                                                   | The association was<br>significant in<br>residents from<br>Northeastern and<br>Northern China,<br>while for other areas,<br>the associations were<br>null. The association<br>was significant in the<br>younger age group<br>but not, the older<br>aged. No significant<br>differences between<br>males and females<br>among different<br>smoking statuses or<br>economic<br>development. |
| Jia 2016 <sup>(74)</sup><br>Zhejiang | RCT, P, 2-<br>arm (1IG,<br>1CG)<br>20, n-10 at<br>each group | COPD patients<br>without a current<br>exacerbation<br>F: NR<br>NR y                                                                                                                                               | IG: Forest<br>CG: urban<br>environment           | Walking in the site for<br>1.5h twice a day with<br>a 20-min rest during<br>the walk for 7 days                                                                       | Pulmonary and activation-<br>regulated chemokine,<br>surfactant protein D, tissue<br>inhibitor of<br>metalloproteinase | Objective:<br>blood test<br>before and<br>after  | All pulmonary markers: ↓*                                                                                                                      | Forest walking reduced<br>biomarkers related to<br>COPD compared to<br>walking in the urban<br>environment.<br>There was no association<br>between residential<br>greenness and respiratory<br>and allergic outcomes<br>found. Proximity to park<br>negatively associated with<br>current asthma and ever<br>asthma at 3rd (>903m, ns)<br>and 4th quartile (>1348 m,<br>P<0.05). | Not measured                                                                                                                                                                                                                                                                                                                                                                              |
| Li 2019a <sup>(20)</sup><br>Jiangsu  | CSS<br>5, 891(248)                                           | School children<br>F: 48.2<br>Mostly 12-15 y                                                                                                                                                                      | Residential green<br>space, proximity to<br>park | NDVI within a 0.1 km,<br>0.2 km, 0.5 km and<br>1km radius around the<br>residential area,<br>distance from<br>residential address to<br>the nearest park using<br>GIS | Current asthma, ever<br>eczema, ever rhinitis                                                                          | Subjective:<br>doctor-<br>diagnosis and<br>ISAAC | NDVIs: all outcomes: null<br>per IQR increase in NDVI<br><b>Proximity to park:</b> current<br>asthma, ever asthma 3rd<br>QR(-) and 4th QR (-)* |                                                                                                                                                                                                                                                                                                                                                                                  | Not measured                                                                                                                                                                                                                                                                                                                                                                              |

|                               |                                                          |                                                                                                                                                            |                                                                |                                                                                                                                          |                                                    |                                          |                                                                                                                                          |                                                                                                                                                                                                                                                                                 |                                                                                                                                                        |
|-------------------------------|----------------------------------------------------------|------------------------------------------------------------------------------------------------------------------------------------------------------------|----------------------------------------------------------------|------------------------------------------------------------------------------------------------------------------------------------------|----------------------------------------------------|------------------------------------------|------------------------------------------------------------------------------------------------------------------------------------------|---------------------------------------------------------------------------------------------------------------------------------------------------------------------------------------------------------------------------------------------------------------------------------|--------------------------------------------------------------------------------------------------------------------------------------------------------|
| Wang 2016<br>(40)<br>Shanghai | CCS<br>Case:156<br>Control:156                           | Case: Lung cancer patients living in the area for 5+ y<br>Control: Pair patients visited hospital living in the area for 5+ y<br>F: 62%<br>Mean ~61±12.3 y | Residential Green space per capita, proximity to park          | GIS within 2 km radius around the residential address, The distance of the neighbourhood to the nearest park.                            | Lung cancer incidence                              | Objective: clinical diagnosis            | Green space per capita: null<br>proximity to park: (+)                                                                                   | Proximity to park but not green space per capita was positively associated with lung cancer.                                                                                                                                                                                    | Green space with trees was associated with less incidence of lung cancer.                                                                              |
| Wang L 2019 (41)<br>Shanghai  | CSS<br>China<br>population<br>Lung cancer: 12,309 (1063) | Middle aged and older population living at street/town/township administrative unit<br>F: 33% for lung cancer cases 50–86 y                                | Green space coverage and density at street/town/township level | % of green space coverage to the total area of street/town/township level and how dispersed the green space is using Land Use Status Map | Standardized lung cancer incidence (aged-adjusted) | Objective: hospital record, cases/10,000 | Green space coverage: All space units : (-)*<br>Industrial parks excluded: null<br>Green space density: null                             | Green space at street/town/township level was negatively and significantly associated with lung cancer; however, this association was not significant when the industrial park area was excluded. No association was found between green space density and lung cancer neither. | Not measured                                                                                                                                           |
| Xie 2018 (47)<br>Hubei        | CSS<br>731(31)                                           | Older population appeared in public space spaces<br>F: 57%<br>60+ y                                                                                        | Accessibility to park                                          | Nearest distance from the residence to the nearest parks based on the road network                                                       | Respiratory diseases                               | subjective                               | null                                                                                                                                     | Accessibility to the park did not show any association with the subjectively measured respiratory disease.                                                                                                                                                                      | Not measured                                                                                                                                           |
| Zeng 2020a (59)<br>Liaoning   | CSS<br>59,754(0)                                         | School or kindergarten children living in the area for 2+y<br>F: 49%<br>Mean 10.3 ± 3.6 y                                                                  | Green space around the school                                  | NDVI within 1 km radius around the school (sensitivity analysis with radii of 0.1 km, 0.3 km to 0.5 km)                                  | Current asthma and wheeze                          | Subjective: ATS-DLD-78-A                 | Current asthma and wheeze (-)* per 0.1 unit increase in NDVI<br>A dose-response manner relationship was found when analysed in tertiles. | Green space around the school was negatively and significantly associated with current asthma and wheeze in a dose-response manner.                                                                                                                                             | Air pollution exposure and doctor-diagnosed allergy symptoms mediated the association.<br>Physical activity and BMI did not show any mediating effect. |

## Mortality

| Author Year province | Study design<br>Sample size (attrition) | Population (health condition, %female, age) | Environment focus | Exposure/intervention measures and follow ups | Outcomes measured | Method of [outcomes] measurement/ time points measured | Results * p<0.05 | Summary of findings | Mediation of effect moderation |
|----------------------|-----------------------------------------|---------------------------------------------|-------------------|-----------------------------------------------|-------------------|--------------------------------------------------------|------------------|---------------------|--------------------------------|
|----------------------|-----------------------------------------|---------------------------------------------|-------------------|-----------------------------------------------|-------------------|--------------------------------------------------------|------------------|---------------------|--------------------------------|

|                                            |                                  |                                                                                     |                                                                                    |                                                                                                                                                                                                                                                                                                                                                                                                                              |                                                            |                                                                          |                                                                                                                       |                                                                                                                                                                                           |                                                                                                                     |
|--------------------------------------------|----------------------------------|-------------------------------------------------------------------------------------|------------------------------------------------------------------------------------|------------------------------------------------------------------------------------------------------------------------------------------------------------------------------------------------------------------------------------------------------------------------------------------------------------------------------------------------------------------------------------------------------------------------------|------------------------------------------------------------|--------------------------------------------------------------------------|-----------------------------------------------------------------------------------------------------------------------|-------------------------------------------------------------------------------------------------------------------------------------------------------------------------------------------|---------------------------------------------------------------------------------------------------------------------|
| Ji 2019 <sup>(16)</sup><br>All             | CS, pros<br>31, 618(7,<br>864)   | Oldest-old<br>population from<br>CLHLS cohort<br>F: 62<br>80+ y, mean 93 ± 7.5<br>y | Contemporaneous<br>and cumulative<br>residential green<br>space, change in<br>NDVI | NDVI within the 0.25<br>km and 1.25 km<br>(0.5km as sensitivity<br>analysis) radius<br>around the residential<br>address at the time<br>closest to an event and<br>mean NDVI and<br>change over the<br>follow-up period<br>Follow up: up to 14 y<br>NDVI within the 0.5<br>km radius around the<br>residential address at<br>the time closest to an<br>event and mean NDVI<br>over the follow-up<br>period<br>Follow up: 6 y | All-cause mortality except<br>for accidental event         | Subjective:<br>from family<br>members                                    | Contemporaneous<br>NDVI0.25, NDVI1.25: (-)*;<br>Cumulative NDVIs: null<br>NDVI change: null                           | Contemporaneous NDVIs<br>was associated with<br>decreased all-cause<br>mortality. Cumulative<br>NDVIs and change in<br>NDVIs did not show any<br>association with all-cause<br>mortality. | The protective effects<br>of nearby greenness<br>were more<br>pronounced among<br>women and those<br>who exercised. |
| Ji 2020 <sup>(17)</sup><br>All             | CS, pros<br>16, 820(3,<br>947)   | Older population<br>from CLHLS cohort<br>F: 57%<br>65+ y, mean 87.0 ±<br>11.3y      | Contemporaneous<br>and cumulative<br>residential green<br>Space                    |                                                                                                                                                                                                                                                                                                                                                                                                                              | All-cause mortality                                        | Subjective:<br>from family<br>members)                                   | Contemporaneous<br>NDVI0.5 (-)*<br>Cumulative NDVIs: null                                                             | Contemporaneous NDVI<br>was associated with<br>decreased all-cause<br>mortality. Cumulative<br>NDVI did not show any<br>association.                                                      | PM2.5 mediated the<br>association with a<br>small effect size.                                                      |
| Li 2020 <sup>(21)</sup><br>All             | ES<br>158 province<br>population | General population<br>F: NA<br>NA y                                                 | County level green<br>space coverage                                               | Green space coverage<br>ratio using National<br>Database                                                                                                                                                                                                                                                                                                                                                                     | Cardiorespiratory<br>mortality (per 100,000<br>population) | Objective:<br>national<br>database                                       | (-)*                                                                                                                  | County level green space<br>coverage was negatively<br>and significantly<br>associated with<br>cardiorespiratory<br>mortality.                                                            | Not measured                                                                                                        |
| Madaniyazi<br>2016 <sup>(32)</sup><br>All  | ES<br>73 cities<br>population    | General population<br>F: NA<br>19-24 y, mean 21.7 ±<br>0.4 (SE) y                   | Green space per<br>capita (moderator) at<br>the city level                         | Annual green space<br>per capita from<br>Statistical Yearbook                                                                                                                                                                                                                                                                                                                                                                | Total, respiratory and<br>cardiovascular mortalities       | Objective:<br>national<br>database                                       | All outcomes: (-)*                                                                                                    | Annual green space was<br>modifying the negative<br>effect of air pollution on<br>total, respiratory and<br>cardiovascular mortalities.                                                   | Not measured                                                                                                        |
| Takano <sup>(38)</sup><br>2002<br>Shanghai | ES<br>20 districts               | General population<br>F: NA<br>NA y                                                 | Green space<br>coverage and urban<br>green space coverage<br>at the district level | % of green space<br>(green areas, park and<br>gardens) or urban<br>green space according<br>to the land use record<br>to the total area or<br>urban area of the<br>district                                                                                                                                                                                                                                                  | Mortality (age-adjusted)                                   | Objective:<br>national<br>database<br>(deaths per<br>1000<br>population) | Green space coverage<br>years 1995, 1996, 1997: (-)*<br>Urban green space<br>coverage years 1995, 1996,<br>1997: null | Total green space<br>coverage at the district<br>level but not urban green<br>space coverage was<br>negatively and<br>significantly associated<br>with age-adjusted<br>mortality.         | Not measured                                                                                                        |

---

**Infectious diseases**


---

| Author Year province                                    | Study design<br>Sample size (attrition) | Population (health condition, %female, age) | Environment focus                                                                                                         | Exposure/intervention measures and follow ups  | Outcomes measured                          | Method of [outcomes] measurement/ time points measured | Results * p<0.05                                                                                                                           | Summary of findings                                                                                                                                                                                                                                                                                                                                                                                                                      | Mediation of effect moderation |
|---------------------------------------------------------|-----------------------------------------|---------------------------------------------|---------------------------------------------------------------------------------------------------------------------------|------------------------------------------------|--------------------------------------------|--------------------------------------------------------|--------------------------------------------------------------------------------------------------------------------------------------------|------------------------------------------------------------------------------------------------------------------------------------------------------------------------------------------------------------------------------------------------------------------------------------------------------------------------------------------------------------------------------------------------------------------------------------------|--------------------------------|
| Chen 2020 <sup>(5)</sup><br>Guangdong                   | ES<br>Guangzhou and Foshan population   | General population<br>F: NA<br>NA y         | Green space per capita, forest coverage                                                                                   | Statistical Yearbook at a town/street level    | Dengue fever                               | Objective: national database                           | Green space per capita: (+)* top 10 influencing factors in Guangzhou<br>Forest coverage: (+)* top 8 influencing factors in Foshan          | Green space per capita was among the top 10 influencing factors of dengue fever in Guangzhou, and forest coverage was among the top 8 in Foshan.                                                                                                                                                                                                                                                                                         | Not measured                   |
| Hundessa 2018 <sup>(15)</sup><br>All                    | ES<br>China population                  | General population<br>F: NA<br>NA y         | Green space at country level                                                                                              | NDVI using US geological survey data           | Malaria presence                           | Objective: national database                           | Vivax malaria: (+)*<br>falciparum malaria: (+)*                                                                                            | Green space at the country level was significantly associated with vivax malaria and falciparum malaria presence.<br>Green space (including productive plantation and environmental protection areas) has a positive association with tuberculosis and malaria incidences and a negative association with dysentery incidence. There was no association between three epidemic diseases and public green space and green space coverage. | Not measured                   |
| Liu 2019a <sup>(27)</sup><br>All                        | CS, retro<br>China population           | General population<br>F: NA<br>NA y         | Green space (including productive plantation and environmental protection area), public green space, green space coverage | Statistics Yearbook of China<br>Follow up: 9 y | Dysentery, tuberculosis, malaria incidence | Objective: national database                           | <b>Public green space and green space coverage:</b> All outcomes: null<br><b>Green space:</b> Dysentery: (-)*; tuberculosis, malaria: (+)* |                                                                                                                                                                                                                                                                                                                                                                                                                                          | Not measured                   |
| Zhang 2017 <sup>(60)</sup><br>Sichuan, Tibet and Yunnan | ES<br>Hotspots' population              | General population<br>F: NA<br>NA y         | Forest coverage at the district level                                                                                     | Land cover map                                 | Bacillary dysentery                        | Objective: national database                           | non-forest: (+)*                                                                                                                           | The non-forest area was associated with a risk of bacillary dysentery.                                                                                                                                                                                                                                                                                                                                                                   | Not measured                   |
| <b>Birth outcomes</b>                                   |                                         |                                             |                                                                                                                           |                                                |                                            |                                                        |                                                                                                                                            |                                                                                                                                                                                                                                                                                                                                                                                                                                          |                                |
| Author Year province                                    | Study design<br>Sample size (attrition) | Population (health condition, %female, age) | Environment focus                                                                                                         | Exposure/intervention measures and follow ups  | Outcomes measured                          | Method of [outcomes] measurement/ time points measured | Results * p<0.05                                                                                                                           | Summary of findings                                                                                                                                                                                                                                                                                                                                                                                                                      | Mediation of effect moderation |

[illegible]

| Author Year<br>province               | Study<br>design<br>Sample size<br>(attrition)                | Population (health<br>condition, %female,<br>age)                                | Environment focus                      | Exposure/intervention<br>measures and follow<br>ups                                             | Outcomes measured                                                                                                                                                                                                                   | Method of<br>[outcomes]<br>measurement/<br>time points<br>measured | Results<br>* p<0.05                                                                                                                                                                                                                                                                                                                                                                                                                                                                                                                                                                                          | Summary of findings                                                                                                                                                                                                                                                                                                                                                                                                                                                                                                                                | Mediation of effect<br>moderation |
|---------------------------------------|--------------------------------------------------------------|----------------------------------------------------------------------------------|----------------------------------------|-------------------------------------------------------------------------------------------------|-------------------------------------------------------------------------------------------------------------------------------------------------------------------------------------------------------------------------------------|--------------------------------------------------------------------|--------------------------------------------------------------------------------------------------------------------------------------------------------------------------------------------------------------------------------------------------------------------------------------------------------------------------------------------------------------------------------------------------------------------------------------------------------------------------------------------------------------------------------------------------------------------------------------------------------------|----------------------------------------------------------------------------------------------------------------------------------------------------------------------------------------------------------------------------------------------------------------------------------------------------------------------------------------------------------------------------------------------------------------------------------------------------------------------------------------------------------------------------------------------------|-----------------------------------|
| Jia 2016 <sup>(74)</sup><br>Zhejiang  | RCT, P, 2-<br>arm (1IG,<br>1CG)<br>20, n=10 at<br>each group | COPD patients<br>without a current<br>exacerbation<br>F: NR<br>NR y              | Forest                                 | Walking in the site for<br>1.5h twice a day with a<br>20-min rest during the<br>walk for 7 days | pro-inflammatory<br>cytokines (IL-6, IL-8, TNF-<br>a, CRP, interleukin-1 $\beta$ ,<br>interferon- $\gamma$ )<br>NK, NKT-like, and CD8+ T<br>cells, perforin and<br>granzyme B<br>stress markers (Cortisol,<br>epiendorphine)        | Objective:<br>blood test<br>before and<br>after                    | IL-6, IL-8, interferon- $\gamma$ ,<br>interleukin-1b, CRP, CD8+<br>T-cells, NKT-like cells,<br>Cortisol, epiendorphine:<br>$\downarrow$ *;<br>TNF-a: $\downarrow$ ;<br>proportions of all<br>lymphocyte subsets,<br>proportions of lymphocyte<br>subsets expressing<br>granzyme, NK cells: (null)<br><b>Baseline:</b> all outcomes:<br>null<br><b>Follow up</b><br>TNF-a, IL-6,<br>malondialdehyde, Total B<br>cell, ET-1, cortisol ( $\downarrow$ )*;<br>Total B cell $\uparrow$ *; CD4/CD8,<br>NK cell $\uparrow$<br>T-SOD, Th lymphocyte, Ts<br>lymphocyte,<br>platelet activation,<br>testosterone: null | Walking in a forest did<br>decreased pro-<br>inflammatory cytokines,<br>proportions of<br>lymphocyte subsets<br>expressing perforin, stress<br>markers in COPD patients<br>compared to walking in<br>the urban environment.<br>No significant difference<br>between groups at<br>baseline.<br>Walking in a forest<br>significantly decreased<br>pro-inflammatory markers<br>(TNF-a, IL-6), oxidative<br>stress marker<br>(malondialdehyde),<br>cortisol levels, and<br>increased Total B cells<br>compared to walking in<br>the urban environment. | Not measured                      |
| Mao 2012 <sup>(78)</sup><br>Zhejiang  | RCT, P, 2-<br>arm<br>20, n=10 at<br>each group               | Healthy university<br>students<br>F: 0%<br>Mean 20.8 $\pm$ 0.5 y                 | IG: Forest<br>CG: Urban<br>environment | Walking in the site for<br>1.5h twice a day with a<br>20-min rest during the<br>walk for 2 days | IL-6, TNF-a, T-SOD,<br>malondialdehyde, CRP,<br>Total T cell (%), Total B<br>cell(%), Th lymphocyte<br>(%), Ts lymphocyte (%),<br>CD4/CD8, NK cell (%),<br>Platelet activation (CD42a<br>+ /CD14), cortisol,<br>testosterone levels | Objective:<br>blood test<br>before and<br>after the test           | malondialdehyde, Total B<br>cell, ET-1, cortisol ( $\downarrow$ )*;<br>Total B cell $\uparrow$ *; CD4/CD8,<br>NK cell $\uparrow$<br>T-SOD, Th lymphocyte, Ts<br>lymphocyte,<br>platelet activation,<br>testosterone: null                                                                                                                                                                                                                                                                                                                                                                                    | pro-inflammatory markers<br>(TNF-a, IL-6), oxidative<br>stress marker<br>(malondialdehyde),<br>cortisol levels, and<br>increased Total B cells<br>compared to walking in<br>the urban environment.                                                                                                                                                                                                                                                                                                                                                 | Not measured                      |
| Mao 2012a <sup>(77)</sup><br>Zhejiang | RCT, p, 2-<br>arm<br>24(0), IG: 12,<br>CG: 12                | Elderly patients with<br>hypertension and<br>CHF class I-III<br>F: NR<br>60-75 y | IG: Forest<br>CG: Urban<br>environment | Walking in the site for<br>1.5h twice a day with a<br>20-min rest during the<br>walk for 7 days | IL-6, TNF-a                                                                                                                                                                                                                         | Objective:<br>blood test<br>before and<br>after the test           | <b>Baseline:</b> null<br><b>Follow up:</b> null                                                                                                                                                                                                                                                                                                                                                                                                                                                                                                                                                              | No significant difference<br>in blood IL-6, TNF-a levels<br>between two groups at<br>baseline and follow-ups.                                                                                                                                                                                                                                                                                                                                                                                                                                      | Not measured                      |

|                                                                           |                                                                      |                                                                               |                                                                                                                    |                                                                                                                                 |                                                                                                                                          |                                             |                                                                                                                                                                                                           |                                                                                                                                                                                                                                                                                |                                                                                                                                                                                                                                                       |
|---------------------------------------------------------------------------|----------------------------------------------------------------------|-------------------------------------------------------------------------------|--------------------------------------------------------------------------------------------------------------------|---------------------------------------------------------------------------------------------------------------------------------|------------------------------------------------------------------------------------------------------------------------------------------|---------------------------------------------|-----------------------------------------------------------------------------------------------------------------------------------------------------------------------------------------------------------|--------------------------------------------------------------------------------------------------------------------------------------------------------------------------------------------------------------------------------------------------------------------------------|-------------------------------------------------------------------------------------------------------------------------------------------------------------------------------------------------------------------------------------------------------|
| Xie 2018 <sup>(47)</sup><br>Hubei                                         | CSS<br>731(31)                                                       | Older population<br>appeared in public<br>space spaces<br>F: 57%<br>60+ y     | Accessibility to park                                                                                              | Nearest distance from<br>the residence to the<br>nearest parks based on<br>the road network                                     | Joint diseases, digestive<br>diseases, endocrine<br>diseases, urological<br>disease, nervous system<br>diseases, respiratory<br>diseases | subjective                                  | Joint diseases and<br>endocrine diseases 3rd QR<br>and 4th QR vs 1st QR: (-)*;<br>digestive diseases,<br>urological diseases,<br>nervous system disease:<br>null                                          | Accessibility to park was<br>associated with a lower<br>odds of joint diseases and<br>endocrine diseases at<br>quartile 3 and 4 compared<br>to the quartile of 1; no<br>association was found for<br>digestive diseases,<br>urological diseases and<br>nervous system disease. | Not measured                                                                                                                                                                                                                                          |
| Xie 2020 <sup>(48)</sup><br>Henan                                         | CSS<br>27,654(0)                                                     | Rural population<br>F: 60%<br>18–79 y, mean 55.9<br>± 12.2 y                  | Residential green<br>space                                                                                         | NDVI and EVI within<br>1 km radius around<br>the residential area<br>(sensitivity analysis<br>with radii of 0.5 km<br>and 3 km) | Sleep quality                                                                                                                            | Subjective:<br>PSQI                         | per IQR increment in<br>NDVI and EVI: (-)*                                                                                                                                                                | Green space was<br>negatively and<br>significantly associated<br>with poor sleep quality.                                                                                                                                                                                      | Air pollution<br>mediated the<br>association. Physical<br>activity and BMI did<br>not show any<br>mediating effect.<br><br>A stronger<br>association was<br>found among males<br>and individuals with<br>higher household<br>income and<br>education. |
| Zeng 2020b <sup>(81)</sup><br>and Lyu<br>2019b <sup>(76)</sup><br>Sichuan | RCT, P, 4-<br>arm (3IG,<br>1CG)<br>120(NR),<br>n=30 at each<br>group | Healthy university<br>students<br>F:50%<br>19-24 y, mean 21.7 ±<br>0.4 (SE) y | IGs: bamboo forests<br>(YA),<br>bamboo forests ( YB),<br>and bamboo park<br>(DJY)<br>CG: urban<br>environment (CS) | 3 days of viewing the<br>site in the morning<br>and then walking in<br>the afternoon each for<br>15 mins                        | Peripheral oxygen<br>saturation                                                                                                          | Objective  <br>before and<br>after the test | IG1 vs CG: peripheral<br>oxygen saturation after<br>viewing: ↑*<br><br>IG2 vs CG: peripheral<br>oxygen saturation after<br>viewing ↑<br><br>IG3 vs CG: peripheral<br>oxygen saturation after<br>viewing ↑ | Viewing a bamboo forest<br>or a bamboo park<br>increased peripheral<br>oxygen saturation<br>compared to viewing an<br>urban environment.                                                                                                                                       | Not measured                                                                                                                                                                                                                                          |



|                                              |                                                                        |                                                                                 |                                                                                                                    |                                                                                                          |                                                                                                                                           |                                      |                                                                                                                                                       |                                                                                                                                                                                                                                        |                                                                                                                                                                                                               |
|----------------------------------------------|------------------------------------------------------------------------|---------------------------------------------------------------------------------|--------------------------------------------------------------------------------------------------------------------|----------------------------------------------------------------------------------------------------------|-------------------------------------------------------------------------------------------------------------------------------------------|--------------------------------------|-------------------------------------------------------------------------------------------------------------------------------------------------------|----------------------------------------------------------------------------------------------------------------------------------------------------------------------------------------------------------------------------------------|---------------------------------------------------------------------------------------------------------------------------------------------------------------------------------------------------------------|
|                                              | 60(NR), n=15<br>at each<br>group                                       | Sub-analysis of male<br>participants                                            | IGs: bamboo forests<br>(YA),<br>bamboo forests ( YB),<br>and bamboo park<br>(DJY)<br>CG: urban<br>environment (CS) | 3 days of viewing the<br>site in the morning<br>and then walking in<br>the afternoon each for<br>15 mins | Peripheral oxygen<br>saturation, NK activity<br>number of NK cells,<br>perforin, granulysin,<br>granzyme A, granzyme B,<br>corticosterone | Objective                            | Corticosterone ↓*<br>NK activity, number of NK<br>cells, perforin, granzyme<br>A, granzyme B ↑*;<br>peripheral oxygen<br>saturation, granulysin: null | All types of exposure to<br>bamboo forest or park<br>significantly decreased<br>SBP, mood disturbance,<br>and its negative<br>subcomponents, and<br>increased immune system-<br>related biomarkers<br>compared to the control<br>group | Not measured                                                                                                                                                                                                  |
| Zhu 2019b-<br>study 1 <sup>(67)</sup><br>All | CS, pros<br>39, 225<br>(19,400)                                        | Older population<br>from CLHLS cohort<br>F: 59%<br>65+ y, mean 88±11.5<br>y     | Residential green<br>space                                                                                         | Baseline mean NDVI<br>within 0.5km radius<br>around the<br>residential addresses<br>Follow up: 2-14 y    | Cognitive function and<br>impairment                                                                                                      | Subjective:<br>MMSE, and<br>MMSE <24 | Cognitive function and<br>impairment: null                                                                                                            | Residential green space<br>did not predict cognitive<br>function among the older<br>population.                                                                                                                                        | Not measured                                                                                                                                                                                                  |
| Zhu 2019b-<br>study 2 <sup>(67)</sup><br>All | CSS<br>39, 225(898)                                                    | Older population<br>from CLHLS cohort<br>F: 59%<br>65+ y, mean 88±11.5<br>y     | Residential green<br>space                                                                                         | Baseline mean NDVI<br>within 0.5km radius<br>around the residential<br>addresses                         | Cognitive function and<br>impairment                                                                                                      | Subjective:<br>MMSE, and<br>MMSE <25 | cognitive function and lack<br>of cognitive impairment:<br>(+)*                                                                                       | Residential green space<br>was positively and<br>significantly associated<br>with cognitive function<br>and lack of cognitive<br>impairment.                                                                                           | Not measured                                                                                                                                                                                                  |
| Zhu 2020a<br><sup>(68)</sup><br>All          | CS, pros<br>Total: 19,726<br>(12, 731)<br>65-79 y: 3470<br>80+ y: 3524 | Older population<br>from CLHLS cohort<br>F: 51%<br>65+ y, mean 80.0 ±<br>11.0 y | Residential green<br>space                                                                                         | Baseline mean NDVI<br>within 0.5 km radius<br>around the residential<br>addresses<br>Follow up: 2-14 y   | Cognitive function                                                                                                                        | Subjective:<br>MMSE                  | All age: 1st QR vs 4th QR<br>and 0.1-unit of NDVI (+)*<br>65-79 y: 1st QR vs 4th QR<br>and 0.1-unit of NDVI (+)*<br>80+: null                         | Residential green space<br>was positively and<br>significantly associated<br>with cognitive function for<br>analysis of all ages and<br>those aged 65 - 79 y but<br>not for those aged 80+ y                                           | The protective effect<br>of residential<br>greenness on<br>cognitive<br>impairment was<br>observed among the<br>non-ε4 carriers but<br>not among the ε4<br>carriers; the<br>interaction was<br>insignificant. |
| Zhu 2020c<br><sup>(70)</sup><br>All          | CS, pros<br>2, 439(1,<br>103)                                          | Older population +65<br>from CLHLS cohort<br>F: 53%<br>Mean 83 ± 11.7 y         | Residential green<br>space                                                                                         | Baseline mean NDVI<br>within 0.5 km radius<br>around the residential<br>addresses<br>Follow up: 12 y     | Vitamin D deficiency<br>Vitamin D (change)                                                                                                | Objective:<br>blood test             | 0.1-unit increase in NDVI,<br>stable vs improved: (+)*                                                                                                | Residential green space<br>was positively and<br>significantly associated<br>with vitamin D non-<br>deficiency and improved<br>the level of vitamin D                                                                                  | The association was<br>stronger in men and<br>people free from<br>disability at baseline.                                                                                                                     |

**Abbreviations:** ADHD, attention deficient hyperactivity disorder; ADL, disabilities in activities of daily living; Ang II, angiotensin II; AT1, angiotensin II type 1 receptor; AT2, angiotensin II type 2 receptor; ATS-DLD-78-A, standardization project questionnaire of the American Thoracic Society; BAS, before-after study; BMI, Body mass index; BNP, brain natriuretic peptide; CBCL; childhood behavior checklist; CCS, case-control study; CES-D, epidemiologic studies depression scale; CG, control group; CHD, congenital heart defect; CHF, chronic heart failure; CO, cross-over; COPD, chronic obstructive pulmonary disease; CS-pros; cohort study-prospective; CS-retro, cohort study-retrospective; CSS, cross-sectional study; DBP, diastolic blood pressure; DSM-IV, diagnostic and statistical manual of mental disorders-Fourth Edition; EEG, electroencephalogram; EQLS, European quality of life survey; ET-1, endothelin-1; EVI, Enhanced vegetation index; FI, frailty index; GHQ-12, general health questionnaire; GIS, geographic information system; HDL-C, high-density lipoprotein cholesterol; HOMA-IR, homeostatic model assessment-insulin resistance; HOMA-B, homeostatic model assessment- $\beta$ -cell function; HRV, heart rate variability; IADL, instrumental activities of daily living, IG, intervention group, IL-6, interleukin-6; IL-8, interleukin-8; ISAAC, asthma and allergies in childhood questionnaire; LDL-C, low-density lipoprotein cholesterol; MHSs, national mental health services survey; MMSE, mini-mental state examination; NDVI, normalized difference vegetation index; NT-ProBNP, N-terminal-pro hormone brain natriuretic peptide; P, parallel; PoMS, profile of mood states, PSQI, Pittsburgh sleep quality index; QoL, quality of life; QR, interquartile range; RAS, renin-angiotensin system; RCT, Randomised controlled trial; ROS, restorative outcome scale; SAVI, soil adjusted; vegetation index; SBP, systolic blood pressure; SDM, semantic differential method; SF, short form health survey 12-Item or 36- Item; SSL-I, social well-being scale and social support list-interactions; STAI; State-trait anxiety inventory; SVS; Subjective Vitality Scale; SWBS, subjective well being scale; TC, total cholesterol; TG, triglycerides; TNF-a, tumour necrosis factor-a; T-SOD, total super oxide dismutase; VAS, visual analogue scale; VCF, vegetation continuous field; WC, waist circumference; WHOQOL-BREF, WHO quality of life assessment brief version; WHO- 5, World Health Organization well-being index; (+), positive association; (-), negative association;  $\uparrow$ , increase;  $\downarrow$ , decrease.

## References

1. Bao WW, Yang BY, Zou ZY, *et al.* Greenness surrounding schools and adiposity in children and adolescents: Findings from a national population-based study in China. *Environmental Research*. 2021;192:110289.
2. Chang P-J, Lin Y, Song R, *et al.* Leisure satisfaction mediates the relationships between leisure settings, subjective well-being, and depression among middle-aged adults in Urban China. *Applied Research in Quality of Life*. 2019;14(4):1001-17.
3. Chen H, Liu Y, Zhu Z, *et al.* Does where you live matter to your health? Investigating factors that influence the self-rated health of urban and rural Chinese residents: evidence drawn from Chinese General Social Survey data. *Health Qual Life Outcomes*. 2017;15(1):78.
4. Chen Y, Stephens M, Jones CA. Does Residents' Satisfaction with the Neighbourhood Environment Relate to Residents' Self-Rated Health? Evidence from Beijing. *Int J Environ Res Public Health*. 2019;16(24).
5. Chen Y, Yang Z, Jing Q, *et al.* Effects of natural and socioeconomic factors on dengue transmission in two cities of China from 2006 to 2017. *Science of the Total Environment*. 2020;724:138200.
6. Dong H, Qin B. Exploring the link between neighborhood environment and mental wellbeing: A case study in Beijing, China. *Landscape and Urban Planning*. 2017;164:71-80.
7. Fan S, Xue Z, Yuan J, *et al.* Associations of residential greenness with diabetes mellitus in chinese uyghur adults. *International Journal of Environmental Research and Public Health*. 2019;16(24):5131.
8. Fan S, Yang BY, Xue Z, *et al.* Associations between residential greenness and blood lipids in Chinese Uyghur adults. *Environment International*. 2020;142:105903.
9. Fan J, Guo Y, Cao Z, *et al.* Neighborhood greenness associated with chronic obstructive pulmonary disease: A nationwide cross-sectional study in China. *Environmental International*. 2020;144:106042.
10. Helbich M, Yao Y, Liu Y, *et al.* Using deep learning to examine street view green and blue spaces and their associations with geriatric depression in Beijing, China. *Environmental International*. 2019;126:107-17.
11. Huang B, Liu Y, Feng Z, *et al.* Residential exposure to natural outdoor environments and general health among older adults in Shanghai, China. *International Journal for Equity in Health*. 2019;18(1):N.PAG-N.PAG.
12. Huang B, Huang C, Feng Z, *et al.* Association between residential greenness and general health among older adults in rural and urban areas in China. *Urban Forestry and Urban Greening*. 2020.
13. Huang B, Liu Y, Chen Y, *et al.* Establishing associations between residential greenness and markers of adiposity among middle-aged and older Chinese adults through multilevel structural equation models. *International journal of hygiene and environmental health*. 2020;230:113606.
14. Huang W-Z, Yang B-Y, Yu H-Y, *et al.* Association between community greenness and obesity in urban-dwelling Chinese adults. *The Science of the total environment*. 2020;702:135040.
15. Hundessa S, Li S, Liu L, *et al.* Projecting environmental suitable areas for malaria transmission in China under climate change scenarios. *Environ Res*. 2018;162:203-10.
16. Ji JS, Zhu A, Bai C, *et al.* Residential greenness and mortality in oldest-old women and men in China: a longitudinal cohort study. *The Lancet Planetary health*. 2019;3(1):e17-e25.
17. Ji JS, Zhu A, Lv Y, *et al.* Interaction between residential greenness and air pollution mortality: analysis of the Chinese Longitudinal Healthy Longevity Survey. *The Lancet Planetary Health*. 2020;4(3):e107-e15.
18. Jia X, Yu Y, Xia W, *et al.* Cardiovascular diseases in middle aged and older adults in China: the joint effects and mediation of different types of physical exercise and neighborhood greenness and walkability. *Environmental Research*. 2018;167:175-83.
19. Leng H, Li S, Yan S, *et al.* Exploring the relationship between green space in a neighbourhood and cardiovascular health in the winter city of China: A study using a health survey for harbin. *International Journal of Environmental Research and Public Health*. 2020;17(2):513.
20. Li L, Hart JE, Coull BA, *et al.* Effect of Residential Greenness and Nearby Parks on Respiratory and Allergic Diseases among Middle School Adolescents in a Chinese City. *International Journal of Environmental Research and Public Health*. 2019;16(6).
21. Li C, Song Y, Tian L, *et al.* Urban form, air quality, and cardiorespiratory mortality: A path analysis. *International Journal of Environmental Research and Public Health*. 2020;17(4):1202.
22. Liao J, Chen X, Xu S, *et al.* Effect of residential exposure to green space on maternal blood glucose levels, impaired glucose tolerance, and gestational diabetes mellitus. *Environmental Research*. 2019;176:108526.
23. Liao J, Yang S, Xia W, *et al.* Associations of exposure to green space with problem behaviours in preschool-aged children. *International journal of epidemiology*. 2020;49(3):944-53.
24. Lin L, Li Q, Yang J, *et al.* The associations of residential greenness with fetal growth in utero and birth weight: A birth cohort study in Beijing, China. *Environment International*. 2020;141:105793.
25. Liu M, Huang Y, Hiscock R, *et al.* Do Climate Change Policies Promote or Conflict with Subjective Wellbeing: A Case Study of Suzhou, China. *International Journal of Environmental Research and Public Health*. 2016;13(3):344.
26. Liu H, Li F, Li J, *et al.* The relationships between urban parks, residents' physical activity, and mental health benefits: A case study from Beijing, China. *J Environ Manage*. 2017;190:223-30.
27. Liu L, Zhong Y, Ao S, *et al.* Exploring the relevance of green space and epidemic diseases based on panel data in China from 2007 to 2016. *International Journal of Environmental Research and Public Health*. 2019;16(14):2551.

28. Liu Y, Wang R, Xiao Y, *et al.* Exploring the linkage between greenness exposure and depression among Chinese people: Mediating roles of physical activity, stress and social cohesion and moderating role of urbanicity. *Health & Place*. 2019;58:N.PAG-N.PAG.
29. Liu Y, Wang R, Grekousis G, *et al.* Neighbourhood greenness and mental wellbeing in Guangzhou, China: What are the pathways? *Landscape and Urban Planning*. 2019;190.
30. Liu Y, Wang R, Lu Y, *et al.* Natural outdoor environment, neighbourhood social cohesion and mental health: Using multilevel structural equation modelling, streetscape and remote-sensing metrics. *Urban Forestry and Urban Greening*. 2020;48.
31. Lu T, Lane M, Van der Horst D, *et al.* Exploring the impacts of living in a "green" city on individual BMI: A study of Lingang new town in Shanghai, China. *International Journal of Environmental Research and Public Health*. 2020;17(19):1-15.
32. Madaniyazi L, Guo Y, Chen R, *et al.* Predicting exposure-response associations of ambient particulate matter with mortality in 73 Chinese cities. *Environmental pollution (Barking, Essex : 1987)*. 2016;208(Pt A):40-7.
33. Nie Z, Yang B, Ou Y, *et al.* Maternal residential greenness and congenital heart defects in infants: A large case-control study in Southern China. *Environment International*. 2020;142:105859.
34. Peng W, Jiang M, Shi H, *et al.* Cross-sectional association of residential greenness exposure with activities of daily living disability among urban elderly in Shanghai. *International journal of hygiene and environmental health*. 2020;230:113620.
35. Qiu Y, Liu Y, Li Z. Exploring the linkage between the neighborhood environment and mental health in Guangzhou, China. *International Journal of Environmental Research and Public Health*. 2019;16(17):3206.
36. Qu Y, Yang B, Lin S, *et al.* Associations of greenness with gestational diabetes mellitus: The Guangdong Registry of Congenital Heart Disease (GRCHD) study. *Environmental Pollution*. 2020;266:115127.
37. Sun X, Luo X, Cao G, *et al.* Associations of ambient temperature exposure during pregnancy with the risk of miscarriage and the modification effects of greenness in Guangdong, China. *Science of the Total Environment*. 2020;702:134988.
38. Takano T, Fu J, Nakamura K, *et al.* Age-adjusted mortality and its association to variations in urban conditions in Shanghai. *Health Policy*. 2002;61(3):239-53.
39. Tang S, Lee HF, Feng J. Social capital, built environment and mental health: A comparison between the local elderly people and the 'laopiao' in urban China. *Ageing and Society*. 2020:1-25.
40. Wang L, Zhao X, Xu W, *et al.* Correlation analysis of lung cancer and urban spatial factor: Based on survey in Shanghai. *Journal of Thoracic Disease*. 2016;8(9):2626-37.
41. Wang L, Sun W, Zhou K, *et al.* Spatial analysis of built environment risk for respiratory health and its implication for urban planning: A case study of shanghai. *International Journal of Environmental Research and Public Health*. 2019;16(8):1455.
42. Wang R, Helbich M, Yao Y, *et al.* Urban greenery and mental wellbeing in adults: Cross-sectional mediation analyses on multiple pathways across different greenery measures. *Environmental Research*. 2019;176:108535.
43. Wang R, Liu Y, Xue D, *et al.* Depressive symptoms among Chinese residents: how are the natural, built, and social environments correlated? *BMC Public Health*. 2019;19(1):887.
44. Wang R, Yang B, Yao Y, *et al.* Residential greenness, air pollution and psychological well-being among urban residents in Guangzhou, China. *Science of the Total Environment*. 2020;711:134843.
45. Wang Z, Zhang C, Chen Y, *et al.* The effects of urban park on residents' health: An empirical study based on Tangxi River Park in Hefei. *IOP Conference Series: Earth and Environmental Science*. 2020;569.
46. Xiao X, Yang B-Y, Hu L-W, *et al.* Greenness around schools associated with lower risk of hypertension among children: Findings from the Seven Northeastern Cities Study in China. *Environmental pollution (Barking, Essex : 1987)*. 2020;256:113422.
47. Xie B, An Z, Zheng Y, *et al.* Healthy aging with parks: Association between park accessibility and the health status of older adults in urban China. *Sustainable Cities and Society*. 2018;43:476-86.
48. Xie Y, Xiang H, Di N, *et al.* Association between residential greenness and sleep quality in Chinese rural population. *Environmental International*. 2020;145:106100.
49. Xue T, Zhu T, Zheng Y, *et al.* Declines in mental health associated with air pollution and temperature variability in China. *Nature Communications*. 2019;10(1):2165.
50. Yang B-Y, Markevych I, Bloom MS, *et al.* Community greenness, blood pressure, and hypertension in urban dwellers: The 33 Communities Chinese Health Study. *Environment International*. 2019;126:727-34.
51. Yang B-Y, Markevych I, Heinrich J, *et al.* Associations of greenness with diabetes mellitus and glucose-homeostasis markers: The 33 Communities Chinese Health Study. *International Journal of Hygiene & Environmental Health*. 2019;222(2):283-90.
52. Yang B-Y, Markevych I, Heinrich J, *et al.* Residential greenness and blood lipids in urban-dwelling adults: The 33 Communities Chinese Health Study. *Environmental pollution (Barking, Essex : 1987)*. 2019;250:14-22.
53. Yang BY, Zeng XW, Markevych I, *et al.* Association between Greenness Surrounding Schools and Kindergartens and Attention-Deficit/Hyperactivity Disorder in Children in China. *JAMA Network Open*. 2019;2(12):190673.
54. Yang M, Dijst M, Faber J, *et al.* Using structural equation modeling to examine pathways between perceived residential green space and mental health among internal migrants in China. *Environmental Research*. 2020;183:109121.
55. Yang B-Y, Liu K-K, Markevych I, *et al.* Association between residential greenness and metabolic syndrome in Chinese adults. *Environment International*. 2020;135:105388.
56. Yang B-Y, Hu L-W, Jalaludin B, *et al.* Association Between Residential Greenness, Cardiometabolic Disorders, and Cardiovascular Disease Among Adults in China. *JAMA Network Open*. 2020;3(9):e2017507-e.

57. Yang T, Barnett R, Fan Y, *et al.* The effect of urban green space on uncertainty stress and life stress: A nationwide study of university students in China. *Health & Place*. 2019;59:N.PAG-N.PAG.
58. Ying Z, Ning LD, Xin L. Relationship between built environment, physical activity, adiposity, and health in adults aged 46–80 in Shanghai, China. *Journal of Physical Activity and Health*. 2015;12(4):569–78.
59. Zeng XW, Lowe AJ, Lodge CJ, *et al.* Greenness surrounding schools is associated with lower risk of asthma in schoolchildren. *Environment International*. 2020;143:105967.
60. Zhang H, Si Y, Wang X, *et al.* Environmental Drivers and Predicted Risk of Bacillary Dysentery in Southwest China. *Int J Environ Res Public Health*. 2017;14(7).
61. Zhang L, Kwan MP, Chen F, *et al.* Impacts of individual daily greenspace exposure on health based on individual activity space and structural equation modeling. *International Journal of Environmental Research and Public Health*. 2018;15(10):2323.
62. Zhang CJP, Barnett A, Johnston JM, *et al.* Objectively-measured neighbourhood attributes as correlates and moderators of quality of life in older adults with different living arrangements: The alects cross-sectional study. *International Journal of Environmental Research and Public Health*. 2019;16(5).
63. Zhao Y, Yu F, Jing B, *et al.* An analysis of well-being determinants at the city level in China using big data. *Social Indicators Research*. 2019;143(3):973–94.
64. Zhou M, Tan S, Tao Y, *et al.* Neighborhood socioeconomic, food environment and land use determinants of public health: Isolating the relative importance for essential policy insights. *Land Use Policy*. 2017;68:246–53.
65. Zhou Y, Yuan Y, Chen Y, *et al.* Association Pathways Between Neighborhood Greenspaces and the Physical and Mental Health of Older Adults—A Cross-Sectional Study in Guangzhou, China. *Frontiers in Public Health*. 2020;8.
66. Zhu A, Yan LL, Wu CD, *et al.* Residential greenness, activities of daily living, and instrumental activities of daily living: A longitudinal cohort study of older adults in China. *Environmental Epidemiology*. 2019;3(5):e065.
67. Zhu A, Wu C, Yan LL, *et al.* Association between residential greenness and cognitive function: analysis of the Chinese Longitudinal Healthy Longevity Survey. *BMJ Nutrition, Prevention & Health*. 2019;bmjnph-2019-000030.
68. Zhu A, Yan L, Shu C, *et al.* APOE epsilon4 Modifies Effect of Residential Greenness on Cognitive Function among Older Adults: A Longitudinal Analysis in China. *Scientific reports*. 2020;10(1):82.
69. Zhu A, Yan L, Wu C, *et al.* Residential Greenness and Frailty Among Older Adults: A Longitudinal Cohort in China. *Journal of the American Medical Directors Association*. 2020;21(6):759–.
70. Zhu A, Zeng Y, Ji JS. Residential Greenness Alters Serum 25(OH)D Concentrations: A Longitudinal Cohort of Chinese Older Adults. *Journal of the American Medical Directors Association*. 2020.
71. Elsadek M, Liu B, Lian Z. Green façades: Their contribution to stress recovery and well-being in high-density cities. *Urban Forestry and Urban Greening*. 2019;46.
72. Elsadek M, Liu B, Lian Z, *et al.* The influence of urban roadside trees and their physical environment on stress relief measures: A field experiment in Shanghai. *Urban Forestry & Urban Greening*. 2019;42:51–60.
73. Hassan A, Tao J, Li G, *et al.* Effects of Walking in Bamboo Forest and City Environments on Brainwave Activity in Young Adults. *Evid Based Complement Alternat Med*. 2018;2018:9653857.
74. Jia BB, Yang ZX, Mao GX, *et al.* Health effect of forest bathing trip on elderly patients with chronic obstructive pulmonary disease. *Biomedical and Environmental Sciences*. 2016;29(3):212–8.
75. Lyu B, Zeng C, Deng S, *et al.* Bamboo forest therapy contributes to the regulation of psychological responses. *Journal of Forest Research*. 2019;24(1):61–70.
76. Lyu B, Zeng C, Xie S, *et al.* Benefits of a three-day bamboo forest therapy session on the psychophysiology and immune system responses of male college students. *International journal of environmental research and public health*. 2019;16(24):4991.
77. Mao GX, Cao YB, Lan XG, *et al.* Therapeutic effect of forest bathing on human hypertension in the elderly. *Journal of Cardiology*. 2012;60(6):495–502.
78. Mao GX, Lan XG, Cao YB, *et al.* Effects of short-term forest bathing on human health in a broad-leaved evergreen forest in Zhejiang Province, China. *Biomedical and Environmental Sciences*. 2012;25(3):317–24.
79. Mao GX, Lan XG, Chen ZM, *et al.* The salutary influence of forest bathing on elderly patients with chronic heart failure. *Journal of the American Geriatrics Society*. 2017;64(Supplement 2):S357–S8.
80. Wu Q, Cao Y, Mao G, *et al.* Effects of forest bathing on plasma endothelin-1 in elderly patients with chronic heart failure: Implications for adjunctive therapy. *Geriatrics and Gerontology International*. 2017;17(12):2627–9.
81. Zeng C, Lyu B, Deng S, *et al.* Benefits of a three-day bamboo forest therapy session on the physiological responses of university students. *International Journal of Environmental Research and Public Health*. 2020;17(9).
82. Li D, Zhai Y, Xiao Y, *et al.* Subtypes of park use and self-reported psychological benefits among older adults: A multilevel latent class analysis approach. *Landscape and Urban Planning*. 2019;190.
83. Zhou C, Yan L, Yu L, *et al.* Effect of Short-term Forest Bathing in Urban Parks on Perceived Anxiety of Young-adults: A Pilot Study in Guiyang, Southwest China. *Chinese Geographical Science*. 2019;29(1):139–50.
